# Supplementary material for: Socio-economic, epidemiological and geographic features based on GIS-integrated mapping to identify malarial hotspots
Source: Malar J. 2015 May 7;14:192. doi: 10.1186/s12936-015-0685-4 (PMC4435919; doi:10.1186/s12936-015-0685-4)
Supplement: Additional file 1: — List of malaria hotspots on GIS-integrated approach. [file 12936_2015_685_MOESM1_ESM.xlsx]

## Sheet: Hotspot_places
	Integrated Hotspot Classes Villages
S.No.	Class	Place Name
1	High	Jaipar
2	High	Barhalgang
3	High	Bhiti
4	High	Basawanpur
5	High	Bhasauli
6	High	Misrauli
7	High	Gartholi
8	High	Sansarpar
9	High	Sidhuapar
10	High	Marawat
11	High	Sidhuapar
12	High	Khajuri Pandey
13	High	Kuraon
14	High	Lacchmiipur
15	High	Durgapur
16	High	Baridiha
17	High	Bhadia Tilur
18	High	Barahata		a
19	High	Amhakpur
20	High	Dhudhuri
21	High	Pharsar
22	High	Bheri Dih
23	High	Dawanadih
24	High	Panditpur
25	High	Majhovalia
26	High	Madpur
27	High	Rudauli
28	High	Majhauliya Khas
29	High	Gahiraghat
30	High	Mishrauli
31	High	Ghosi
32	High	Kalyanpur
33	High	Shanichara Patti Babu
34	High	Bairiyadih
35	High	Bahasua
36	High	Katghara
37	High	Khutbhar
38	High	Bhirwa
39	High	Rasulpur Misra
40	High	Bharauli
41	High	Bhabhya
42	High	Bhulan Chak
43	High	Lachchhi Chak
44	High	Dilmanpur
45	High	Inayat Chak
46	High	Makarha
47	High	Rapatpur
48	High	Purwa
49	High	Lona Nagar
50	High	Tikapur
51	High	Chautara Babu
52	High	Dhuriadih
53	High	Manjharia Taluk Dhyanpur
54	High	Jhae
55	High	Dudh Kunda
56	High	Domaria
57	High	Manjharia
58	High	Babhnauli
59	High	Gosaepur
60	High	Keradih
61	High	Chhitauni Khurd
62	High	Jadwapur
63	High	Marha
64	High	Mahulia
65	High	Chhitauni Bhim
66	High	Siswa Babu
67	High	Ranjitgarh
68	High	Lalchak
69	High	Rasulpur Babu
70	High	Belwa Dari
71	High	Chaparhat
72	High	Godhana
73	High	Belghat
74	High	Rampur
75	High	Purnaha
76	High	Brahmadeva
77	High	Akauna Khurd
78	High	Tikuliadar
79	High	Dhunia Pura
80	High	Amanabad
81	High	Katha Babu
82	High	Majhagawan
83	High	Dhorae Par
84	High	Bidhanpar
85	High	Bahadurpur Khurd
86	High	Bala Chak
87	High	Bahadurpur Bujurg
88	High	Dheku Nadh
89	High	Matiyaria
90	High	Chautra Patti
91	High	Chautra Tiwari
92	High	Lakhua Pakar
93	High	Kotia Patti
94	High	Kotia Kolahal
95	High	Chaudia Masan
96	High	Jhajhawa
97	High	Parouli
98	High	Rajgarh
99	High	Garh
100	High	Mahuja
101	High	Sati
102	High	Jagarnathpur
103	High	Paresapar
104	High	Chawaria Khurd
105	High	Ghipjokhar
106	High	Ahirauli
107	High	Girdharpur Solanki
108	High	Chauria Buzurg
109	High	Ahirauli
110	High	Dharamshala
111	High	Chauria Buzurg
112	High	Kauwaram Khurd
113	High	Dhaunsa
114	High	Harpur
115	High	Purwapar
116	High	Girdharpur Chaube
117	High	Dariha Buzurg
118	High	Deodanr (Gopalpur)
119	High	Mahupar
120	High	Tighra Khurd
121	High	Teonan
122	High	Kudaria
123	High	Bohabar
124	High	Tendua
125	High	Dariha Khurd
126	High	Bastupar
127	High	Kataia
128	High	Amwa
129	High	Khuruhuri Chhoti
130	High	Dhaski
131	High	Dhanaura Buzurg
132	High	Singhpur
133	High	Palahpur
134	High	Somahi
135	High	Potrutola
136	High	Panar Purwa arazi
137	High	Madhotola
138	High	Saharia
139	High	Dewarbir
140	High	Lalpur
141	High	Siharwa
142	High	Satahwa Chak
143	High	Belwa Khurd
144	High	Misraulia
145	High	Dhanaura Khurd
146	High	Dhaska
147	High	Jariahia
148	High	Mahuja
149	High	Keotantola
150	High	Neorl
151	High	Malkatola
152	High	Malauli
153	High	Kalani
154	High	Bhatas
155	High	Ranipur
156	High	Ahirantola
157	High	Belwa Buzurg
158	High	Gurmhi
159	High	Haraja
160	High	Nadua Gajanpur
161	High	Kauriram
162	High	Loniatola
163	High	Bhitaha
164	High	Bhakurha
165	High	Keotantola
166	High	Sonai Khurd
167	High	Sanro
168	High	Gobrauri
169	High	Gursairi
170	High	Sohgaura
171	High	Sahasraon
172	High	Barigaon
173	High	Shikargaoh
174	High	Tikar
175	High	Kaithauli
176	High	Pochia
177	High	Kaithauli
178	High	Diliaghat
179	High	Gobraur
180	High	Kukurbhukwd
181	High	Bijra Tal
182	High	Kaparphorwa
183	High	Itaua
184	High	Mitthabel
185	High	Panrar
186	High	Mahuar Kol
187	High	Harpur
188	High	Narendarpur
189	High	Bharkachha
190	High	Kotsikra
191	High	Dubauli
192	High	Mohanpur
193	High	Nakaha
194	High	Uttarka
195	High	Chhitahri
196	High	Nakwar Ghat
197	High	Barwa
198	High	Lakaria
199	High	Kharkhunta
200	High	Nakwar
201	High	Nibhi
202	High	Karouni
203	High	Matiara
204	High	Phailah
205	High	Nouabari
206	High	Belahi
207	High	Bhaurahi
208	High	Pandeori
209	High	Bairahi
210	High	Longiadih
211	High	Batahra
212	High	Nakwar
213	High	Ghoth
214	High	Jogia
215	High	Lilkanth Sahi
216	High	Roha
217	High	Harilwa
218	High	Bhagne
219	High	Kormaita
220	High	Khutaha
221	High	Jairam Kol
222	High	Lachhmpur
223	High	Barahra
224	High	Bankatia
225	High	Bharohia
226	High	Barohri
227	High	Raghunandanpur
228	High	Raghupatti
229	High	Keotantola
230	High	Lalapur
231	High	Piprapat
232	High	Purniha
233	High	Sonahna
234	High	Kulran
235	High	Bangla
236	High	Barwatola
237	High	Bodhi Chhapar
238	High	Basuhi
239	High	Gorsaira
240	High	Ahirantola
241	High	Mator
242	High	Padri
243	High	Chainpur
244	High	Nunia
245	High	Belwa
246	High	Rampur
247	High	Dihghat
248	High	Barampur
249	High	Duldulia
250	High	Silhata Mundera
251	High	Bankata Bazar
252	High	Kuiran
253	High	Sherpur Barahra
254	High	Jagat Gobind
255	High	Chhota
256	High	Simri
257	High	Shukul Jot
258	High	Solabhartola
259	High	Amghat
260	High	Balewa
261	High	Sonbarsatala
262	High	Karaundh
263	High	Tongrl
264	High	Nauki Bazar
265	High	Narainpur
266	High	Updhaulia
267	High	Baijudiha
268	High	Bhotuha
269	High	Kanail
270	High	Bishunpura
271	High	Kol Pahia
272	High	Nakahatola
273	High	Karahi
274	High	Karahi
275	High	Hathkhal
276	High	Karwania
277	High	Piprahia
278	High	Bhatahi
279	High	Kuiran
280	High	Belwa Alamdas
281	High	Naukatola
282	High	Majhwa
283	High	Dharam Rai
284	High	Bhatahi Khurd
285	High	Parsia
286	High	Natwa
287	High	Ramnagar
288	High	Naukatola
289	High	Ghatull
290	High	Ahiran
291	High	Sumahi
292	High	Gushain
293	High	Bhatwa
294	High	Majhgawan
295	High	Hatwa
296	High	Rajdhani
297	High	Pirarahia
298	High	Konan Sonbarsa
299	High	Arah
300	High	Khairatia
301	High	Mathia
302	High	Bhiswa
303	High	Barhi
304	High	Nilami
305	High	Balughata
306	High	Rampur
307	High	Tendua Khurd
308	High	Imlia
309	High	Katahriatola
310	High	Lohraulia
311	High	Balghataghat
312	High	Beni Jot
313	High	Bhanpur
314	High	Dehra Dabar
315	High	Bela
316	High	Hathkhal
317	High	Uda Bhagat
318	High	Shiva Pur
319	High	Simrauna
320	High	Chakia
321	High	Kharharwa
322	High	Bhatahi
323	High	Mahual
324	High	Gushain
325	High	Karmajhatola
326	High	Shankarpatti
327	High	Daria
328	High	Pakwatola
329	High	Barhawa
330	High	Barsatpur
331	High	Pachrulhra
332	High	Naktaha
333	High	Unchgaon
334	High	Barbasaha
335	High	Bhaisahi Naresh
336	High	Khiryahwa
337	High	Bharsandwa
338	High	Balra
339	High	Ahirwati
340	High	Nathapatti
341	High	Sumahi
342	High	Senwapar
343	High	Khatalia
344	High	Mahuabar
345	High	Chakdah
346	High	RESULAPUR JANGAL
347	High	Naukatola
348	High	Piash
349	High	Jakhnigaon
350	High	Goraritola
351	High	Pachrukhia
352	High	Porsauni
353	High	Raji
354	High	Patkhauli
355	High	Mangalpur
356	High	Bhaisah
357	High	Ataria
358	High	Bogeswaridevi Tanda
359	High	Kaurrtol
360	High	Bhulan Chhapra
361	High	Bargadwa
362	High	Katrar
363	High	Lachhmanpur
364	High	Amarpur
365	High	Sumahi Khurd
366	High	Dubauli
367	High	Bilrahwa
368	High	Kastura
369	High	Aima
370	High	Mundera
371	High	Kuin
372	High	Pitambarpur
373	High	Pachrukhiatola
374	High	lJolahbarl
375	High	Bintolia
376	High	Jagdishpur
377	High	Pipra Bhairo
378	High	Bishnathpur
379	High	Chak Deiya
380	High	Mohnapur
381	High	Karjahi
382	High	Pakariar
383	High	Katrari
384	High	Chaura
385	High	Khakharwatola
386	High	Pharendaha
387	High	Panditpur
388	High	Nawapar
389	High	Chhattu Katea
390	High	Solgarhi
391	High	Chakdahwa
392	High	Amdiha
393	High	Jogidas Kuti
394	High	Bantel
395	High	Kalthaulia
396	High	Pakriar (Binwalia)
397	High	Chaura
398	High	Pipra Manni
399	High	Kolhat
400	High	Lachhmipur
401	High	Srikishan Sahi
402	High	Tola Ramtawakal Sahi
403	High	Rampur
404	High	Khapria Bhar
405	High	Satahwa
406	High	Belhi
407	High	Naukatola
408	High	Nakaitola
409	High	Barhara
410	High	Rampur
411	High	Mathia
412	High	Karpaiya
413	High	Lathaur
414	High	Chhapra
415	High	Dhaski Buzurg
416	High	Tarwanwan
417	High	Semra
418	High	Gauri
419	High	Kumian
420	High	Mohtan
421	High	Bhaupur
422	High	Jangol
423	High	Dosoukdtha
424	High	Sonbarsa
425	High	Amahia
426	High	Piprahia
427	High	Moti Pakar
428	High	Lachhmanpur
429	High	Araswa
430	High	Dumbhagra(Barsait)
431	High	Dhaski Khurd
432	High	Sugaha
433	High	Pokharbhinda
434	High	Chouri
435	High	Barbaspur(Tala Ramsharan)
436	High	Bhiswa
437	High	Bhataulia
438	High	Uttarwala
439	High	Bahiyawan
440	High	Usmanpur
441	High	Bhaisahja
442	High	Basdila
443	High	Sidhritola
444	High	Dholbajwa
445	High	Darjia
446	High	Gajpur
447	High	Rakba
448	High	Lachhmipur
449	High	Chakdeia
450	High	Parsauni
451	High	Bhataulia
452	High	Kutni
453	High	Barsait(Gaur)
454	High	Dharam
455	High	Binhatola
456	High	Lachhmipur
457	High	Bodurohiyatola
458	High	Noniapatti
459	High	Parsauni
460	High	Mahdewa Adai
461	High	Bhatulia
462	High	Bishanpur
463	High	Pokharbhinda
464	High	Mahuwari
465	High	Karounlatola
466	High	Sulaniya Bazar
467	High	Bulbulahtila
468	High	Parendtola
469	High	Bharatpur
470	High	Chaura
471	High	Belwa Khurd
472	High	Baraipatti
473	High	Kotwa
474	High	Jauramanrakhan
475	High	Mahdewa
476	High	Bairagitola
477	High	Banpipra
478	High	Barbaspur
479	High	BHARATPUR LACHHMANPUR
480	High	Jhangha
481	High	Belwa
482	High	Bardaha Bazar
483	High	Ojhaulia
484	High	Raghopur
485	High	Banrahwo
486	High	Cnimney
487	High	Lothaya
488	High	Neurtola
489	High	Muglahi
490	High	Katia Mainuddin
491	High	Bishanpura Raja
492	High	Jauramanrakhan
493	High	Katha
494	High	Khartia
495	High	Nibahwa Tal
496	High	Cherian
497	High	Babutola
498	High	Bishunpura
499	High	Mundera
500	High	Pokharbhinda
501	High	Srinagar
502	High	Lachhia Deoria
503	High	Saturahnepur
504	High	Maghi Daritola
505	High	Semia Kol
506	High	Arazi Cherian
507	High	Pakhwa
508	High	Amwa
509	High	Mathanian
510	High	Bal Buzurg
511	High	Murera
512	High	Dil Ram
513	High	Khaira Jat
514	High	Karmaha
515	High	Baluigara
516	High	Beli
517	High	Kanaura
518	High	Basahia
519	High	Badahra
520	High	Deoria
521	High	Bakulhar
522	High	Baraihra Jot
523	High	Dhanhan
524	High	Dumri Khurd
525	High	Bakulhar Khurd
526	High	THAN TARKULHADEVI
527	High	Gahra
528	High	Bal Khurd
529	High	Mirbhar
530	High	Murer
531	High	Barahattola
532	High	Mathia
533	High	Kanchanpur
534	High	Phutahwainar
535	High	Dondari
536	High	Keoipdabar
537	High	Mahuawa
538	High	Paigambar
539	High	Dhuswa
540	High	Paharpur
541	High	Sheorajpatti
542	High	Jogia Janubipatti
543	High	Bhagwanpur
544	High	Tulsipur
545	High	Bardaha Pande
546	High	Momin Dhekulia
547	High	Barhi
548	High	Bintoli
549	High	Jogia Bichlipatti
550	High	Mothia
551	High	Lachhmipur
552	High	Dubepatti
553	High	Karmaha
554	High	Nadwa Bishanpura
555	High	Keotan
556	High	Pipra Kanak
557	High	Jogia Shamalipatti
558	High	Debipura
559	High	Patia
560	High	Keshopatti
561	High	Khairabad
562	High	Asogwa
563	High	Gagalwa
564	High	Dhamdar
565	High	Puraina
566	High	Mathia
567	High	Bintoli
568	High	Nadwa
569	High	Jogia Hichha Rai
570	High	Banspura
571	High	Sothri
572	High	Deokahi
573	High	Phulwaria
574	High	Debi Chak
575	High	Mahru
576	High	Chainpatti
577	High	Lunlatola
578	High	Lamunahia
579	High	Puraina Ghat
580	High	Madhopur
581	High	Asogwa Khurd
582	High	Rahasu Janubipatti
583	High	Awadhpur
584	High	Parsauni
585	High	Chanau
586	High	Kewla Chak
587	High	Nagla Ajudhia
588	High	Bankata
589	High	Bhauapar
590	High	Bhartolia
591	High	Shiv Chak
592	High	Basdila Durjan
593	High	Rahasu Shamalipatti
594	High	Usrahatola
595	High	Amwa
596	High	Chhaballa
597	High	Ajudhia Chak
598	High	Dublari
599	High	Kotwa
600	High	Tiwari
601	High	Sukrauli
602	High	Sardarnagar Station
603	High	Dhekulia
604	High	Anharitola
605	High	Rajkotwwa
606	High	Karanjhi
607	High	Karmahia
608	High	Chimney Distillery
609	High	Sultanpur
610	High	Khajwa
611	High	Bishanpura
612	High	Sukhbasi
613	High	Mathia
614	High	Semrahia
615	High	Sathiaon
616	High	Satgarahi
617	High	Karanjhi
618	High	Garwatola
619	High	Patherwa
620	High	Dhaurehra
621	High	Patkhauli
622	High	Qazipur
623	High	Muhammadpur
624	High	Phulwapatti
625	High	Bilarl
626	High	Mahadewa
627	High	Baghar
628	High	Matlub Chhapral
629	High	Dasrath Rai
630	High	Saraia Mahantpatti
631	High	Saraia
632	High	Haraia
633	High	Dharipatti
634	High	Deoria
635	High	Sonbarsa
636	High	Sidauli
637	High	Amwa
638	High	Fazil Nagar
639	High	Pipra Rajab
640	High	Sarjutola
641	High	Pandepatti
642	High	Ahladpur
643	High	Mahua
644	High	Ramdasha
645	High	Bhagra(Bhilorahi)
646	High	Saraia Mohantpatti
647	High	Deo Kali
648	High	Garhia
649	High	Goga Rai
650	High	Madhuria
651	High	Dhanauji Khurd
652	High	Jonka
653	High	Ahirtola
654	High	Amkol
655	High	Sinduria Khurd
656	High	Gaunar
657	High	Dhanauji
658	High	Dhar Mathia
659	High	Bamhnauli
660	High	Jonka Khurd
661	High	Gulam Husain
662	High	Naukipatti
663	High	Sinduria
664	High	Maunaha Dih
665	High	Nunlatola
666	High	Balua Rampur Rampur Sirpal
667	High	Maunaha
668	High	Kanchanpur
669	High	Pokhar Bhinda
670	High	Belwa Ponde
671	High	Titauli
672	High	Mathla
673	High	Dhundaulia
674	High	Abhilakh
675	High	Basdila Tilatar
676	High	Arazi Bairagipatti
677	High	Chotur chak
678	High	Lahsari
679	High	Wooden
680	High	Kurmi
681	High	Gadari
682	High	Amarwa Khurd
683	High	Gagalwa
684	High	Rajwa Bar
685	High	Kishandaspatti
686	High	Isar Rai
687	High	Bishunpura
688	High	Kuchia
689	High	Lohlangri
690	High	Balwadih
691	High	Mahua
692	High	Gagra
693	High	Manjharia Bisatul
694	High	Mogalpura
695	High	Khairatola
696	High	Aunrwa Sofiganj
697	High	Lachhmipur
698	High	Baraipar
699	High	Telhnapar
700	High	Bhaluhi
701	High	Sohang
702	High	Bairagipatti
703	High	Usraha
704	High	Motipakar Srikant
705	High	Kirpapatti
706	High	Palia
707	High	Deoria Birt
708	High	Mahua Khurd
709	High	Pipra Nazir
710	High	Pandepatti
711	High	Sapaha
712	High	Rampur Sohrauna
713	High	Dhanha
714	High	Kableswa
715	High	Gaighat Khurd
716	High	Karmaha
717	High	Dhighwa
718	High	Prem Indar
719	High	Amarwa
720	High	Ahirauli
721	High	Jawar
722	High	Pagra Padri
723	High	Deohapatti
724	High	Pansarhi
725	High	Bhainsaha
726	High	Motipakor
727	High	Mainpur
728	High	Pandepatti
729	High	Karmaini
730	High	Dumri
731	High	Deoria Raja
732	High	Gangitikar
733	High	Guraulia
734	High	Kinu Rai
735	High	Mehdipur
736	High	Bhusaulai
737	High	Lutan Rai
738	High	Belwa
739	High	Gaurakhor
740	High	Rajuabar
741	High	Chandrauta
742	High	Batrauli
743	High	Lachhmipur
744	High	Sapahi Khurd
745	High	Bijaidhura
746	High	Atardiha Siwan Sahi
747	High	Karmoha
748	High	Basantpur Harchara Rai
749	High	Pakri Goshain
750	High	Jamunahlatola
751	High	Pagra Parshadgir
752	High	Mahuari
753	High	Ramkola
754	High	Sapahi Prithipartap
755	High	Bishunpura
756	High	Hata
757	High	Bhagwan Rai
758	High	Padri
759	High	Dwelihwa
760	High	Deopokhar
761	High	Sundia
762	High	Semra
763	High	Bandhutola
764	High	Khudra Ahirauli
765	High	Chhapra Mansur
766	High	Rampur Maharath
767	High	Bhelia
768	High	Mangalpur
769	High	Sapahi
770	High	Baikunthpur
771	High	Atardiha Sadasi Rai
772	High	Pande
773	High	Lakus Pachhimpatti
774	High	Biran Mahton
775	High	Lakus Purabpatti
776	High	Bishuntola
777	High	Jagdishpur
778	High	Semra Hardopatti
779	High	Kalwapatti
780	High	Barwa Rajapakar
781	High	Bardiha
782	High	Bishunpur Khurd
783	High	Belwa Khurd
784	High	Atardiha Ram Sahai Sahi
785	High	Durdukhia
786	High	Kishandeopatti
787	High	Tar Bishanpur
788	High	Chet Nagar
789	High	Sri Rampatti
790	High	Gobindpatti
791	High	Misrauli
792	High	Kutkuiyan
793	High	Jagpur
794	High	Sona Rai
795	High	Madui
796	High	Dharha Buzurg
797	High	Belwa
798	High	Bhabhsa
799	High	Jamuan
800	High	Bharaulia
801	High	Barwa
802	High	Belwa
803	High	Belhi
804	High	Rajapakar
805	High	Bangawan
806	High	Sonbarsa
807	High	Haripur
808	High	Ramudlha
809	High	Abhilakh
810	High	Malpur
811	High	Bhataulia
812	High	Sukhrain
813	High	Matiyar
814	High	Bainibhar
815	High	Doghra
816	High	Tenuhari
817	High	Bharpurwa
818	High	Narainpur
819	High	Jonhora
820	High	Jurian
821	High	Narainpur
822	High	Tirma Sahun
823	High	Mathia
824	High	Sahjanwa
825	High	Bhiti
826	High	Basdila Raunsar
827	High	Manjharia
828	High	Kurea Bhilahi
829	High	Kaithwalia
830	High	Kaithwalia
831	High	Majharia
832	High	Jigina
833	High	Jigna
834	High	Rasulpur
835	High	Barsaini
836	High	Doghra
837	High	Kaithaualia
838	High	Tiwaripatti
839	High	Bhiti
840	High	Rakba Dulhmapatti
841	High	Barsaini
842	High	Tirma Sahun
843	High	Rasulpur
844	High	Bakta
845	High	Dharampur
846	High	Kuria
847	High	Mathia
848	High	Tiwaripura
849	High	Manjharia
850	High	Gauri Jagdis
851	High	Pipra
852	High	Karmaina
853	High	Saraiya
854	High	Pipri
855	High	Ujripatti
856	High	Shahbazgan
857	High	Chakia
858	High	Sariswa
859	High	Mohuapar
860	High	Lalipar
861	High	Ganeshpatti
862	High	Karmain
863	High	Sahjanwa
864	High	Keshopur
865	High	Pagar
866	High	Junihan
867	High	Maheshpur
868	High	Tola Shukul
869	High	Ujikhor
870	High	Rampur
871	High	Kauraiya
872	High	Dumri
873	High	Mahua Dih
874	High	Titala
875	High	Luchu
876	High	Chimney
877	High	Kunhuan
878	High	Baraipur
879	High	Machhariha
880	High	Islampur
881	High	Jute mill
882	High	Gagalwa
883	High	Bairia Ghorath
884	High	Dumhar Mafi
885	High	Bishanpur Kaithauli
886	High	Sarda Tal
887	High	Hemdhapur
888	High	Jurwaniya
889	High	Maktapar
890	High	Pandepatti
891	High	Gobindpur
892	High	Patkhauli
893	High	Amarpur
894	High	Kundra
895	High	Lalaka
896	High	Gahasanr
897	High	Parsahwa
898	High	Basia
899	High	Laungpur
900	High	Mollantola
901	High	Nauka Chhapra
902	High	Lehani
903	High	Keotahi
904	High	Keotali
905	High	Bharwaliya
906	High	Singhpur
907	High	Bilhar
908	High	Madraha
909	High	Bhikhatola
910	High	Parsaina
911	High	Mahua Dih
912	High	Munda Kundra
913	High	Shankarpur
914	High	Semra
915	High	Matiharwa
916	High	Shahbazganj
917	High	Piprahi
918	High	Pipralch
919	High	Tenduhari
920	High	Semra
921	High	Baldauli
922	High	Ghera
923	High	Nathua
924	High	Narayanpur
925	High	Chaubia Patkhauli
926	High	Bhaghura
927	High	Kotwa
928	High	Basantpur
929	High	Keshopura
930	High	Patti
931	High	Khorabar
932	High	Basharatpur
933	High	Daftari
934	High	Balua
935	High	Turkauliya
936	High	Nania
937	High	Pagra
938	High	Belwa Buzurg
939	High	Mahulla
940	High	Nakahni
941	High	Rambar
942	High	Patni
943	High	Kolhui
944	High	Mahui Khurd
945	High	Bhauapar
946	High	Pataya
947	High	Chilwa
948	High	Barera
949	High	Chamrauti
950	High	Charangaha
951	High	Narkatiya
952	High	Sikta
953	High	Rampurpatti
954	High	Batardera
955	High	Jolapurwa
956	High	Pattan
957	High	Patai
958	High	Harpur
959	High	Gunai Chhapra
960	High	Balria
961	High	Gangatola
962	High	Nanha Chhapra
963	High	Sihuliya
964	High	Parsauni
965	High	Hanskhor
966	High	Ahirauliray
967	High	Sampur Hatwa
968	High	Pipra Tiwari
969	High	Hatwa
970	High	Dhanha
971	High	Bagra Dewar
972	High	Bhainsadabar
973	High	Ahirauli Raja
974	High	Pipra
975	High	Turkauliya
976	High	Rampur
977	High	Nawapar
978	High	Rampur Barhan
979	High	Semra
980	High	Lohsi
981	High	Bhatahi Raja
982	High	Parsa
983	High	Magurachi
984	High	Chigauna Shumali
985	High	Sonbarsa
986	High	Bhikhu Chhapra
987	High	Mahua
988	High	Bhatahi Babu
989	High	Tamashpur
990	High	Belwa Khurd
991	High	Khadda
992	High	Jigna
993	High	Zabti
994	High	Nabhaiya
995	High	Khotha
996	High	Mathiya Topsi
997	High	Piprasi
998	High	Ramnagar
999	High	Nawa Purwa
1000	High	Lohjhar
1001	High	Pachphera
1002	High	Bhainsahi
1003	High	Naukatola
1004	High	Sakhapar
1005	High	Tinouantola
1006	High	Kanhouli
1007	High	Bhagwat Yadav Dera
1008	High	Mundera
1009	High	Mathiya Narayanpur
1010	High	Nuruddin Chak
1011	High	Ramwali Yadav Dera
1012	High	Jigni
1013	High	Mainabhagar
1014	High	Semrahia
1015	High	Parasrampur
1016	High	Dahla
1017	High	Sukulpatti
1018	High	Baijnathpur
1019	High	Chiuntoha
1020	High	Ramhauliya
1021	High	Mahripur
1022	High	Markaria
1023	High	Bahorapur
1024	High	Bishanpura
1025	High	Sahanpur
1026	High	Chhapia
1027	High	Chirgora
1028	High	Domri
1029	High	Barwapatti
1030	High	Senduar
1031	High	Kohra
1032	High	Khushipatti
1033	High	Birti
1034	High	Sherpur Chamraha
1035	High	Turkdiha
1036	High	Kunrwa
1037	High	Paranpari
1038	High	Bhiswa Balbaria
1039	High	Rampurpatti
1040	High	Ahirauli
1041	High	Mahesra Shaikh Purwa
1042	High	Lala Chhapra
1043	High	Kurmauta
1044	High	Durgwaliya
1045	High	Sahjauli
1046	High	Tikara
1047	High	Jhungla
1048	High	Bajupatti
1049	High	Barwa
1050	High	Aminpur
1051	High	Uska
1052	High	Banjarapatti
1053	High	Bedupar
1054	High	Piprasi
1055	High	Sherpur Chamraha
1056	High	Misrpatti
1057	High	Bandwar
1058	High	Mangru Yadav Dera
1059	High	Narsar
1060	High	Partabpur
1061	High	Sakhauli
1062	High	Sandi Buzurg
1063	High	Nawapar
1064	High	Pakharwa
1065	High	Singhpur
1066	High	Arjunha
1067	High	Dharmauli
1068	High	Khattri Purwa
1069	High	Telgawan
1070	High	Rampur Chak
1071	High	Balua
1072	High	Bishanpura
1073	High	Sandi Khurd
1074	High	Barauli
1075	High	Daulatpur
1076	High	Banjarapatti
1077	High	Langri
1078	High	Nachni
1079	High	Motipakar
1080	High	Sihorwa
1081	High	Tanwa
1082	High	Delha
1083	High	Laukihua
1084	High	Sonbarsa
1085	High	Sandi Dih
1086	High	Ahirauti
1087	High	Siktaur
1088	High	Mirpur
1089	High	Beldartola
1090	High	Bhath
1091	High	Bardipura
1092	High	Keotalia
1093	High	Sohnariya
1094	High	Chakia
1095	High	Sidhuwa Bangar
1096	High	Lehani
1097	High	Lehani
1098	High	Karhiyan
1099	High	Belhi
1100	High	Maniram
1101	High	Intar
1102	High	Bilahia
1103	High	Kundri
1104	High	Balapar
1105	High	Ojhaulia
1106	High	Rahsu
1107	High	Horilapur Bazar
1108	High	Ahirauli
1109	High	Bantikula
1110	High	Kusumha
1111	High	Raghunathpur
1112	High	Mirzapur
1113	High	Menhdariya
1114	High	Panika
1115	High	Rahmatnagar
1116	High	Prempur
1117	High	Jasulipar
1118	High	Sanchar
1119	High	Pakri Khurd
1120	High	Deehghat
1121	High	Kasiya
1122	High	Awarhiyan
1123	High	Pipra
1124	High	Subhatar
1125	High	Mehdia
1126	High	Matiari
1127	High	Lamkan
1128	High	Amahwa
1129	High	Jamnaiya
1130	High	Khurdura
1131	High	Bardiha
1132	High	Lakhnapar
1133	High	Sajnapar
1134	High	Karmua
1135	High	Khand Pataura
1136	High	Bichaupur
1137	High	Bhalwahwa
1138	High	Tendand
1139	High	Hanuman Chak
1140	High	Bangalipatti
1141	High	Kachnar
1142	High	Rasulpur
1143	High	Purwa
1144	High	Mahua Khurd
1145	High	Nothpur
1146	High	Brahmacharitola
1147	High	Dibni
1148	High	Dhilpatti
1149	High	Saptahi
1150	High	Kasia
1151	High	Dhobahi
1152	High	Bhikra
1153	High	Phulwaria
1154	High	Hukahawa
1155	High	Debipur
1156	High	Bishunpur
1157	High	Lachhmipur
1158	High	Dumri
1159	High	Chiuntijam
1160	High	Hanspati
1161	High	Bargadahi
1162	High	Nibi
1163	High	Chainpur
1164	High	Charraon
1165	High	Gopalpur Motilal Chhapra
1166	High	Dakhinwan
1167	High	Goshainpur
1168	High	Gulaur
1169	High	Kathkuian
1170	High	Chaura
1171	High	Ramnagar
1172	High	Ghulwatola
1173	High	Teoran
1174	High	Bipat Purwa
1175	High	Semra Hardo
1176	High	Zindapur
1177	High	Chiuntaha
1178	High	Banauli Lachhmipur
1179	High	Karaunda
1180	High	Rethna
1181	High	Jagdishpur
1182	High	Jalahpar
1183	High	Ramnagar
1184	High	SINGHA
1185	High	Ghoghara
1186	High	Amsar
1187	High	Pipra Sobhmal
1188	High	Manohartola
1189	High	Lochhmanpur
1190	High	Mant
1191	High	Saraia
1192	High	Durgapur
1193	High	Pater
1194	High	Sehri
1195	High	Pothra
1196	High	Churiyara
1197	High	Lahingibari
1198	High	Darogatola
1199	High	Bishunpura
1200	High	Karahiyan
1201	High	Jitpur
1202	High	Belghat
1203	High	Kahar Purwa
1204	High	Matiara
1205	High	Kauria Jangal
1206	High	Slarampur
1207	High	Ahirauli
1208	High	Pakri
1209	High	Bangawan
1210	High	Madhopur
1211	High	Misrauli
1212	High	Sukhnandanpur
1213	High	Barwa Kotwa
1214	High	Bichaupur
1215	High	Bhagwanpur
1216	High	Beldaritola
1217	High	Hariharpur
1218	High	Sahrauna
1219	High	Baglot
1220	High	Palia
1221	High	Singha
1222	High	Bhagwanpur
1223	High	Mamarakpur
1224	High	Birar
1225	High	Narangpatti
1226	High	Ghoghardtola
1227	High	Nakin
1228	High	Banglatola
1229	High	Chaudharitola
1230	High	Shiupur
1231	High	Naukatola
1232	High	Siswa
1233	High	Matiari
1234	High	Kathaur
1235	High	Kotia
1236	High	Nawapar
1237	High	Tal Likhia
1238	High	Mainabhanagar
1239	High	Barhni
1240	High	Siswa
1241	High	Gholwan
1242	High	Gobindpur
1243	High	Gldaha
1244	High	Ekman
1245	High	Chhutki Nakin
1246	High	Keotalia
1247	High	Tawakkulpur
1248	High	Tola Munsik
1249	High	Malmalia
1250	High	Lamuhi
1251	High	Marha Gokuli
1252	High	Bishnupur
1253	High	Dharghat
1254	High	Harha(Sonbarsa)
1255	High	Karkhana
1256	High	Rampur
1257	High	Bhandaro
1258	High	Belwa
1259	High	Tal Koela
1260	High	Bhaktihwotala
1261	High	Basahia Banbirpur
1262	High	Chamrautitola
1263	High	Harpur
1264	High	Parmeshwarpur
1265	High	Gonarpura
1266	High	Sihapar
1267	High	Lokhman
1268	High	Mathia
1269	High	Pachrukhia
1270	High	Dhruy
1271	High	Muhmmadpur
1272	High	Koeal
1273	High	Sonbarsa
1274	High	Turkaulia
1275	High	Narayanpur
1276	High	Nayagaon
1277	High	Rithna
1278	High	Bhansapti
1279	High	Rampur Gopalpur
1280	High	Koharbhar
1281	High	Raghunathpur
1282	High	Kauria Jangal
1283	High	Mahnag
1284	High	Jagannathpur
1285	High	Basantput
1286	High	Gai Ghat
1287	High	Lalkarpur
1288	High	Mallkatola
1289	High	Tarkaulia
1290	High	Ajaibtola
1291	High	Semaria
1292	High	Mahuan
1293	High	Mutnawan
1294	High	Shahpur
1295	High	Mahant Ka Tola
1296	High	Simrahwa
1297	High	Boha
1298	High	Aunrahi Kritpura
1299	High	Lachhmipur
1300	High	Bhaksa
1301	High	Sakharuwa
1302	High	Semaria Khurd
1303	High	Ramnagar
1304	High	Shivdhanpur
1305	High	Niwas
1306	High	Mahrabirpur
1307	High	Sipahia
1308	High	Chamrauti
1309	High	Subahia
1310	High	Marchehwatola
1311	High	Darha Dih
1312	High	Ragghutola
1313	High	Mujdiha
1314	High	Bhelampur
1315	High	Bailo
1316	High	Pachwar
1317	High	Rasulpur Chakia
1318	High	Chauria
1319	High	Sitalpur
1320	High	Abhoram
1321	High	Bhiswa
1322	High	Madhopur
1323	High	Bhagra
1324	High	Bhatolia
1325	High	Siarampur
1326	High	Chorwa
1327	High	Gangrain
1328	High	Kashitola
1329	High	Bhiti
1330	High	Bagh Nager
1331	High	Karmaha Buzurg
1332	High	Sewaintola
1333	High	Sluice
1334	High	Dharva
1335	High	Lachhmipur
1336	High	Bhawanbhari
1337	High	Tola Kasaria
1338	High	Palani
1339	High	Jogdispur
1340	High	Ahirauli
1341	High	Barahra
1342	High	Agya
1343	High	Sisai
1344	High	Nandapar
1345	High	Mangalpur
1346	High	Singhpur
1347	High	Tal Garela
1348	High	Raghunathpur
1349	High	Gobindpur
1350	High	Dahar
1351	High	Dumri
1352	High	Tola Kori
1353	High	Ragarganj
1354	High	Manjharia
1355	High	Barahpatia
1356	High	Gangbarar
1357	High	Thawaipar
1358	High	Harihapur
1359	High	Dharampur
1360	High	Saspur
1361	High	Tola Naipai
1362	High	Harpur
1363	High	Gingta
1364	High	Kudaria Kalan
1365	High	Tindapad
1366	High	Sewain Dusia
1367	High	Raipur
1368	High	Thakurnagar
1369	High	Karmaini
1370	High	Sohwal
1371	High	Kondar
1372	High	Ferry
1373	High	Bhagaunapur
1374	High	Phailawa
1375	High	Chirkutotola
1376	High	Maniram
1377	High	Gulia
1378	High	Narohi
1379	High	Dihwa
1380	High	Machhagar
1381	High	Sairampur
1382	High	Jainpur
1383	High	Kartari
1384	High	Ramughat
1385	High	Reharwa
1386	High	Satnagar
1387	High	Jaitpur
1388	High	Belahia
1389	High	Dumri
1390	High	Gadhoila
1391	High	Kudaria Khurd
1392	High	Harnaiya
1393	High	Jainpur
1394	High	Jamuniara
1395	High	Rajabari
1396	High	Aurahiya
1397	High	Piarepur
1398	High	Belwa
1399	High	Pahrauli
1400	High	Baghaiya
1401	High	Manjharia
1402	High	Jaswal
1403	High	Ahiran Purwa
1404	High	Dihwa
1405	High	Narayanpur
1406	High	Shiupur
1407	High	Mahua Mahui
1408	High	Santpur
1409	High	Nainsar
1410	High	Mahwasar
1411	High	Jarhad
1412	High	Barhni
1413	High	Kolaiya Kalan
1414	High	Jhagraha
1415	High	Semra
1416	High	Garhaiya
1417	High	Donpha
1418	High	Intwa
1419	High	Muhammad Barwa
1420	High	Jogibir
1421	High	Ramwanpur
1422	High	Chhappantola
1423	High	Jainpur
1424	High	Raghunathpur
1425	High	Kartartola
1426	High	Aktania
1427	High	Deopur
1428	High	Indapura
1429	High	Bhiswa
1430	High	Shukul Purwa
1431	High	Bairghata
1432	High	Bargadahi
1433	High	Maksudabad
1434	High	Parsauna Kalan
1435	High	Mansurganj
1436	High	Dumri
1437	High	Kolaiya Khurd
1438	High	Kazipur
1439	High	Manaitapur
1440	High	Nagwa
1441	High	Bamhnauli
1442	High	Beighat
1443	High	Asnaiya
1444	High	Somli
1445	High	Bhagat Purwa
1446	High	Rajpur
1447	High	Jagdispur
1448	High	Mathabari
1449	High	Nibwa
1450	High	Balahia
1451	High	Parsauna Khurd
1452	High	Ramnagar
1453	High	Kahar Purwa
1454	High	Bargadahi
1455	High	Parsewa
1456	High	Jamnahwa
1457	High	Tinhalya
1458	High	Ausia
1459	High	Gangpar
1460	High	Kachgawan
1461	High	Bau Dih
1462	High	Mohiuddinpur
1463	High	Ranipur
1464	High	Dhurwal
1465	High	Bhainsari
1466	High	Ghurhupur
1467	High	Maghi
1468	High	Nataibhari
1469	High	Bharohia
1470	High	Tighra
1471	High	Mandiltola
1472	High	Sankhi
1473	High	Mahua
1474	High	Makhanha
1475	High	Lachhmipur
1476	High	Rana Dih
1477	High	Lehnipur
1478	High	Marha
1479	High	Banketia
1480	High	Karmaha
1481	High	Bichaupur
1482	High	Tiwaripur
1483	High	Jogi Chak
1484	High	Bagahibhari
1485	High	Khadrahwa
1486	High	Sitalpur
1487	High	Rajapur
1488	High	Jagdispur
1489	High	Gularia
1490	High	Helanitola
1491	High	Aktahwa
1492	High	Shivpur
1493	High	Rampur Kaithaulia
1494	High	Nagra
1495	High	Machharia
1496	High	Tola Piprahwa
1497	High	Bharaipur
1498	High	Kanapar
1499	High	Suchitpur
1500	High	Sanjahi
1501	High	Khak Chauk
1502	High	Bhairwa
1503	High	Pemli
1504	High	Terhabir
1505	High	Sarahri
1506	High	Tola Kori
1507	High	Raghunath Pur
1508	High	Chamrauti
1509	High	Mangalpur
1510	High	Irrahia
1511	High	Tola Manik
1512	High	Reballia
1513	High	Piarepur
1514	High	Pokharia
1515	High	Kolwar
1516	High	Sakaldippur
1517	High	Bhagatpura
1518	High	Bhagwanpura
1519	High	Semar Kothia
1520	High	Golahwa
1521	High	Ferry
1522	High	Shahpur
1523	High	Barhya
1524	High	Bhagalpur
1525	High	Kolhua
1526	High	Tola Sriddas
1527	High	Banhu Purwa
1528	High	Jamli
1529	High	Purwa
1530	High	Tegar
1531	High	Thakurpur
1532	High	Kori Purwa
1533	High	Aghalwa
1534	High	Bhitni
1535	High	Mauwasa
1536	High	Dhuisa
1537	High	Boraipur
1538	High	Bankatwa
1539	High	Tharauli
1540	High	Rusapur
1541	High	Tola Mahadeo
1542	High	Ganeshpur
1543	High	Chauk
1544	High	Sahidganj
1545	High	Gadhaikhal
1546	High	Ahirauli
1547	High	Bhuindharpur
1548	High	Chakar
1549	High	Bandraha
1550	High	Barhata
1551	High	Madhopur
1552	High	Tola Ajudhia
1553	High	Sihorghat
1554	High	Sauraha
1555	High	Nagpur
1556	High	Tilak Purwa
1557	High	Bistauli
1558	High	Rampur
1559	High	Fazilpur
1560	High	Sajua Tal
1561	High	Tikaria
1562	High	Jhanjhwa
1563	High	Chamrauti
1564	High	Dihuliya
1565	High	Thokurapar
1566	High	Bankatwa
1567	High	Mauwasar
1568	High	Balawa
1569	High	Lachhmipur
1570	High	Shukal Purwa
1571	High	Sitalpur
1572	High	Harpur
1573	High	Bhagwanpur
1574	High	Bharwal
1575	High	Bargadhi
1576	High	Pachgawan
1577	High	Mangalpur
1578	High	Gurmaha
1579	High	Ramwanpur
1580	High	Budhaili
1581	High	Bhilaunji Kothi
1582	High	Gurmaha
1583	High	Jangal Bihuli
1584	High	Bhambhaur
1585	High	Kariari
1586	High	Belhawa
1587	High	Raji
1588	High	Jangal Jhajhwa
1589	High	Lamuiya
1590	High	Keotalia
1591	High	Phardahni
1592	High	Kusauna Kalan
1593	High	Rampur
1594	High	Phardahni
1595	High	Mathauli
1596	High	Mathauli Khurd
1597	High	Sunri
1598	High	Barwa Kalan
1599	High	Ramnagar
1600	High	Malltola
1601	High	Rikhai
1602	High	Shiupur
1603	High	Bhurdhaili
1604	High	Karauli
1605	High	Bailoha
1606	High	Gopalpur Khurd
1607	High	Harkhori
1608	High	Karmaura
1609	High	Hiruwa
1610	High	Bhan Purwa
1611	High	Narkataha Khurd
1612	High	Lakhrawtola
1613	High	Majhauna
1614	High	Nandupur
1615	High	Dharampur
1616	High	Thawaicha
1617	High	Parkoiya
1618	High	Baraipur
1619	High	Rawatganj
1620	High	Imlia
1621	High	Charkawa
1622	High	Gopalpur Kalan
1623	High	Kuin
1624	High	Maldia
1625	High	Chhataria
1626	High	Bana
1627	High	Ramwanpur
1628	High	Belhawa
1629	High	Kalianpur
1630	High	Karmahwa
1631	High	Gangi
1632	High	Tarkulia
1633	High	Aktahwa
1634	High	Dherna
1635	High	Dharmauli
1636	High	Kanchanpur
1637	High	Narkataha Kalan
1638	High	Gaunar Purwa
1639	High	Rajahi
1640	High	Mithaura
1641	High	Padrahwa
1642	High	Kalithan
1643	High	Kurmitola
1644	High	Lolpur
1645	High	Dhusia
1646	High	Keotalia
1647	High	Muhammadpur
1648	High	Khiriia
1649	High	Barai Purwa
1650	High	Raji
1651	High	Dharagara
1652	High	Niwds
1653	High	Aktahwa
1654	High	Putrahiya
1655	High	Amwa
1656	High	Chikni
1657	High	Mabadevpur
1658	High	Baijanathpur
1659	High	Kahar Purwa
1660	High	Atarsath
1661	High	Dharma Dih
1662	High	Mahto
1663	High	Chiknitola
1664	High	Jagdispur
1665	High	Mahawankhor
1666	High	Bariarwa
1667	High	Bardewa
1668	High	Khokhri
1669	High	Bajahi
1670	High	Kishanpur
1671	High	Dumra
1672	High	Algatpur
1673	High	Karauto
1674	High	Garhkhulwapur
1675	High	Nawal Purwa
1676	High	Harakhpura
1677	High	Khajahi
1678	High	Ahirauli
1679	High	Janakpur
1680	High	Nar Purwo
1681	High	Jhungaiya
1682	High	Pakarpur
1683	High	Mallahtola
1684	High	Gularia
1685	High	Aunrahiya
1686	High	Naukotaola
1687	High	Khajuhi
1688	High	Gidha
1689	High	Bhakhal
1690	High	Aunrahia
1691	High	P Nirghin
1692	High	Sahajganj
1693	High	Barahwa
1694	High	Mahnag
1695	High	Bharitwa
1696	High	Piparahua
1697	High	Khanpur
1698	High	Karmaini
1699	High	Ramgarhwa
1700	High	Bajrihwa
1701	High	Ranipur
1702	High	Kotwa
1703	High	Dusadhipatti
1704	High	Parrahwa
1705	High	Husainabad
1706	High	Sahasgara Tal
1707	High	Manohar Chak
1708	High	Misrauli
1709	High	Biraichi
1710	High	Dahar Tal
1711	High	Muhammadpur
1712	High	Gaighat
1713	High	Koni
1714	High	Sonaura Buzurg
1715	High	Lachhmipur
1716	High	Rigauli
1717	High	Sukhapatti
1718	High	Biraicha
1719	High	Bhari
1720	High	Bahbolia
1721	High	Misrauli
1722	High	Bhaunrabari
1723	High	P Bihari
1724	High	Rameshwarpur
1725	High	P Bhulai
1726	High	Lamui Tal
1727	High	Ghaghwa
1728	High	Mirhiria
1729	High	Ramnagar
1730	High	Chuani
1731	High	Dhusadipatti
1732	High	Padauli
1733	High	Khajurgawan
1734	High	Madra
1735	High	Singha
1736	High	Ghughuli
1737	High	Musabar
1738	High	Gajrahia
1739	High	Banki Tola
1740	High	Rihar
1741	High	Marar Bindaulia
1742	High	Bhojauli
1743	High	Fatehpur
1744	High	Bardahia
1745	High	Srinagar
1746	High	Chanian Tal
1747	High	Chandipur
1748	High	Salik
1749	High	Barlighat
1750	High	Lachhmipur
1751	High	Chakdah
1752	High	Mallahipatti
1753	High	Bhagwanpur
1754	High	Raipur
1755	High	Keotalia
1756	High	Banahua
1757	High	Hagnapur
1758	High	Chaunri Tal
1759	High	Gerui Buzurg
1760	High	Patarki
1761	High	Banjarha
1762	High	Barwa
1763	High	Alinagar
1764	High	Muhammadnagar
1765	High	Bijainagar
1766	High	Keotahlia
1767	High	Gerui Khurd
1768	High	Kaktahi
1769	High	Somrahia
1770	High	Raipur Bhaisahi
1771	High	Bhadrahia
1772	High	Khalanga
1773	High	Ahirauli
1774	High	Ranipur
1775	High	Dukahwa
1776	High	Majhaua
1777	High	Chatra Tal
1778	High	Deotaha
1779	High	Terhwa
1780	High	Jhungwa
1781	High	Harnampur
1782	High	Karimnagar
1783	High	Sangad
1784	High	Semar Dandi (Semra)
1785	High	Bharahia
1786	High	Maganpur
1787	High	Samajhwa
1788	High	Ramwapur
1789	High	Kasmaria
1790	High	Shivpur
1791	High	Bankata
1792	High	Semra
1793	High	Madhopur
1794	High	Bali
1795	High	Rampur Bangar
1796	High	Sagra
1797	High	Nauka
1798	High	Siswa
1799	High	Lachhmanpur
1800	High	Baluhi
1801	High	Piprabari
1802	High	Chauri
1803	High	Bishunpur
1804	High	Raghunathpur
1805	High	Deorwa
1806	High	Atardiha
1807	High	Parsa
1808	High	Belwa
1809	High	Madhwapur
1810	High	Belwa
1811	High	Pachrukhi
1812	High	Parsia
1813	High	Chhutakpur
1814	High	Jogiabari Jangal
1815	High	Pokhriapur
1816	High	Atardiha
1817	High	Bindaulia
1818	High	Gujarpura
1819	High	Nirnam
1820	High	Gobindpur
1821	High	Belwa Danri
1822	High	Madakpur
1823	High	Belwa Ghat
1824	High	Nagesharpur
1825	High	Meharbanpur
1826	High	Bharpatia
1827	High	Karahia
1828	High	Goplapur
1829	High	Girdharpur
1830	High	Hardaspur
1831	High	Soman Jot
1832	High	Sahai Jot
1833	High	Chainpur
1834	High	Pargapur
1835	High	Mahdewa
1836	High	Pipra Bishambharpur
1837	High	Chainpur
1838	High	Brahmdev Chaudhari
1839	High	Runua
1840	High	Sonbarsa
1841	High	Bargadahi
1842	High	Jhunwa
1843	High	Mahabirgarh
1844	High	Pokharbhinda
1845	High	Palku
1846	High	Banahwa
1847	High	Urwalia
1848	High	Parara
1849	High	Kankarahia
1850	High	Bheri
1851	High	Chautarwa
1852	High	Rajwal Madraha
1853	High	Bhartipur
1854	High	Koharpur
1855	High	Patkhauli
1856	High	Parsia Khurd
1857	High	Dhawal Chhapra
1858	High	Parsabeni
1859	High	Dhusia
1860	High	Bazar
1861	High	Musahr
1862	High	Nurai Jot
1863	High	Hardatpur
1864	High	Girdharpur
1865	High	Shikargarh
1866	High	Pakardiha
1867	High	Sri Narainpur
1868	High	Mithaura Deorwa
1869	High	Gujar Purwa
1870	High	Lajar Mahdewa
1871	High	Uditpur
1872	High	Niamatpur
1873	High	Pharenda
1874	High	Arbhangi
1875	High	Mahua
1876	High	Jugalpur
1877	High	Dibiapur
1878	High	Piprauli
1879	High	Julahpatti
1880	High	Naudihwa
1881	High	Saruppur
1882	High	Baikunthpur
1883	High	Baikunthpur
1884	High	Katahia
1885	High	Bishunpur Adrauna
1886	High	Alinagar
1887	High	Dihwa
1888	High	Ratanpur
1889	High	Lodhpur
1890	High	Girharwa
1891	High	Janakpur
1892	High	Basahia
1893	High	Pipra Mauni
1894	High	Moralri
1895	High	Bhagipur
1896	High	Mathania Chaudhri
1897	High	Mirganj
1898	High	Ramgarh
1899	High	Bhagwatnagar Parsia
1900	High	Mundera Khurd
1901	High	Raninagar
1902	High	Kataiya
1903	High	Morairi
1904	High	Hathausa
1905	High	Pakri
1906	High	Natwahia
1907	High	Sonbarsa
1908	High	Rakhwania
1909	High	Rampur Gondha
1910	High	Mangalpur
1911	High	Sitlapur
1912	High	Buchian
1913	High	Lachhmipur
1914	High	Mujahna
1915	High	Motipur
1916	High	Bargadhi
1917	High	Hariharpur
1918	High	Rampur
1919	High	Kamharia
1920	High	Rudrapur
1921	High	Ahirauli
1922	High	Siswania
1923	High	Senia Tal
1924	High	Akrahwa
1925	High	Sabia
1926	High	Gurli Ghat
1927	High	Pipra Narain
1928	High	Ramgarhwa
1929	High	Heoti
1930	High	Gurli
1931	High	Khajuria
1932	High	Karmahi
1933	High	Chiutaha
1934	High	Chankauli
1935	High	Belwa Lalsa
1936	High	Gobrahi
1937	High	Karidiha
1938	High	Sitlapur
1939	High	Barhia
1940	High	Khekra N
1941	High	Hariharpur
1942	High	Bhutiahi
1943	High	Pakriar
1944	High	Sanda Khurd
1945	High	Belbharia
1946	High	Durgaulia
1947	High	Murlibari
1948	High	Laudhi
1949	High	Parsa Gobarhi Chak
1950	High	Paikauli Khurd
1951	High	Gaunaria
1952	High	Agya
1953	High	Kewat
1954	High	Khapardhika
1955	High	Srinagar
1956	High	Senduria
1957	High	Paikauli
1958	High	Mangalpur
1959	High	Hathiagarh
1960	High	Kishanpur
1961	High	Bagahi
1962	High	Parari
1963	High	Bisokhor
1964	High	Ghornor
1965	High	Nahchhori
1966	High	Naturi
1967	High	Pakri
1968	High	Maraira
1969	High	Chauranjpur Madarha
1970	High	Amtaha
1971	High	Shivlalpur
1972	High	Pipra Bazar
1973	High	Katahri Khurd
1974	High	Jaurhar (Jagarnathpur)
1975	High	Kachahri
1976	High	Katahri
1977	High	Serahwa
1978	High	Parsa Mir
1979	High	Kamta
1980	High	Sugauli
1981	High	Rampurwa
1982	High	Belwa
1983	High	Sonwal
1984	High	Bhagatar
1985	High	Jamunihwa
1986	High	Bakhshipur
1987	High	Gaura Nipanian
1988	High	Semrahni
1989	High	Siswa
1990	High	Pokharbhinda
1991	High	Rampurwa
1992	High	Barwa
1993	High	Kabir Tola
1994	High	Harturwa
1995	High	Barahri
1996	High	Barahra Charangaha
1997	High	Hasai
1998	High	Pathardewa
[truncated: 6,975 more rows]

## Sheet: Geog_Places
Geographical Class	Place Name
Low	Belthar
Low	Ajaipura
Low	Dalua
Low	Jaipar
Low	Barhalgang
Low	Mukundwar
Low	Budhanpura
Low	Jhajwa
Low	Basukhia Bujurg
Low	Rajauli Bjurg
Low	Dumari
Low	Ojhavali
Low	Newada
Low	Pohila
Low	Narhi
Low	Kharesari
Low	Belpar
Low	Rajauli Khurd
Low	Bhiti
Low	Bhiti Dube
Low	Basawanpur
Low	Mahuliya Khurd
Low	Bhasauli
Low	Rampur Garhwa
Low	Anand Garh
Low	Koerari
Low	Sidhi Gaur
Low	Madarha
Low	Misrauli
Low	Derwa
Low	Koerar
Low	Saraya Chak
Low	Chatauli
Low	Gaighat
Low	Barhaya Dube
Low	Gaurpar
Low	Gadhwa
Low	Nibi Tila
Low	Gartholi
Low	Saradaha
Low	Saeya
Low	Nakata
Low	Maibhara
Low	Nawachpar
Low	Mahuliya Poyal
Low	Nibi Dubey
Low	Kokata
Low	Kokta
Low	Bardiha
Low	Sansarpar
Low	Sidhuapar
Low	Bahadurabad
Low	Mangalpur
Low	Mahuapar
Low	Kohnra Bhorwar
Low	Bilwla
Low	Marawat
Low	Lakhnaura
Low	Dubauli
Low	Bishunpura
Low	Bishunpura
Low	Sidhuapar
Low	Saradah
Low	Khajuri Gosain
Low	Khajuri Pandey
Low	Nitwar
Low	Nibiseni
Low	Lakhnauri
Low	Berahua
Low	Bhatanipar Bujurg
Low	Ramjiwanpura
Low	Ramgarh
Low	Patna
Low	Kuraon
Low	Lacchmiipur
Low	Jhumila
Low	Chhapia Umraw
Low	Makarndpur
Low	Baraipar
Low	Distaulia
Low	Ratla
Low	Shukul Puri
Low	Pirahni
Low	Durgapur
Low	Baridiha
Low	Pushkar Bujurg
Low	Tiha Muhammadpur
Low	Parasia Tiwari
Low	Bhatanipur Khurd
Low	Nadua
Low	Devakali
Low	Hinguhar
Low	Bhatnipar Khurd
Low	Dhanauli
Low	Turkwalia
Low	Marwatia
Low	Baghuaiya
Low	Purapar
Low	Barhaj
Low	Bhadia Tilur
Low	Rampur Baghaura
Low	Dadra Dasht Mathanj
Low	Ahirauli
Low	Dhanauli
Low	Barahata
Low	Madaria
Low	Amhakpur
Low	Dhanaw
Low	Pushkar Khurd
Low	Khohia
Low	Narahan
Low	Duramha
Low	Markari
Low	Sarkara
Low	Sakat Pura
Low	Pauharia
Low	Dhudhuri
Low	Pipardari
Low	Dadra
Low	Barpar
Low	Mohammadpur
Low	Pirahani
Low	Maharajang
Low	Bimuti
Low	Rahua
Low	Kundwa Bari
Low	Pakauli Aman Chak
Low	Mundera
Low	Mathihani
Low	Ramanbari
Low	Babhnauli
Low	Khairpar
Low	Dhobauli
Low	Pharsar
Low	Amauli
Low	Pharsand
Low	Rajahata
Low	Atauli
Low	Chaubauli
Low	Asorgaht
Low	Kalhipar
Low	Parasia
Low	Bharroh
Low	Mehra
Low	Kusbhauna
Low	Saunkhor
Low	Lachhmipur
Low	Shlupur
Low	Chhitauna
Low	Sisawa
Low	Bheri Dih
Low	Manjhariya
Low	Besahani
Low	Sahruli
Low	Mundera
Low	Lakhanapar
Low	Marchipar Khurd
Low	Turkwalia
Low	Bhiti Bal
Low	Belawa
Low	Padmalpar
Low	Parari
Low	Sakra Khor
Low	Banjarha
Low	Sahrauli
Low	Ketkon
Low	Udaipur
Low	Bharwali
Low	Nuawa
Low	Chhapia
Low	Ramamau
Low	Patkhauli
Low	Chitthepar
Low	Paraini
Low	Belsari
Low	Bhatpar
Low	Karaundi
Low	Jamin Shukul
Low	Kolhuwa
Low	Marachipar Bujurg
Low	Beisara
Low	Bevari
Low	Manipur
Low	Bahpur
Low	Bhat Chak
Low	Surdapar Raja
Low	Shanichara
Low	Mau Buzurg
Low	Bhiti
Low	Murlipur
Low	Mehadraw
Low	Deep Garh
Low	Mahania
Low	Koili Khal
Low	Akbarabad
Low	Kolhua
Low	Konrar
Low	Saraiya
Low	Tara
Low	Nakati
Low	Parauli
Low	Bari Tarya
Low	Surdapar Shukl
Low	Gan Bazar
Low	Korar Nil Kanth
Low	Kast Subans Dubey
Low	Achhedih
Low	Dawanadih
Low	Bhiti
Low	Panditpur
Low	Newada
Low	Chainpura
Low	Bankata
Low	Khakhaijkhor
Low	Sakharwa Khurd
Low	Mahatopar
Low	Majhovalia
Low	Chak Bulaki
Low	Chikanian
Low	Madpur
Low	Baghagara
Low	Rudauli
Low	Bhat Purwa
Low	Katya
Low	Bhar Purwa
Low	Majhauliya Khas
Low	Jagdispur
Low	Jivchhin
Low	Ramkola
Low	Lugarapar
Low	Kauadil
Low	Sohrabir
Low	Chaukari
Low	Suaraj Khurd
Low	Palhnai
Low	Gahiraghat
Low	Phattepur
Low	Mamkhor
Low	Bisara
Low	Semari
Low	Mishrauli
Low	Semara Bujurg
Low	Bairia
Low	Gopalpur Kohna
Low	Ghosi
Low	Sonsatha
Low	Bhiti
Low	Dewaipipar
Low	Korari
Low	Suaraj Bujurg
Low	Chiraiyadani
Low	Kalyanpur
Low	Bhadaura
Low	Atraura
Low	Satora
Low	Bhaisahat
Low	Semara Khurd
Low	Sakharua Bujurg
Low	Kohana Gopalpur
Low	Loharpur
Low	Baraipar
Low	Fakirpura
Low	Rakauli
Low	Misrauli
Low	Mishrauli
Low	Barhara
Low	Barwal Shankarparshad
Low	Tiragaon Khurd
Low	Kauria
Low	Purania/Arjunpur
Low	Tiragaon
Low	Ranipur
Low	Baraila
Low	Barwal Ishriparshod
Low	Nauli
Low	Parsia Nispi Raja
Low	Barawal Digar
Low	Patra
Low	Baraipar
Low	Jharakata
Low	Lunia Purwa
Low	Pojupar
Low	Shanichara Patti Babu
Low	Manipur
Low	Gorasari
Low	Jugesra
Low	Zamin Lohrapur
Low	Bijuliadand
Low	Barago
Low	Tikaria
Low	Bairiyadih
Low	Pandepurtola
Low	Nevasa
Low	Dheorparmus.
Low	Majhaura
Low	Sahdauli
Low	Tikri
Low	Belana Par
Low	Bahasua
Low	Ranipur
Low	Dubauli
Low	Chimcha
Low	Karokand(Baranagar)
Low	Katghara
Low	Gopalpur
Low	Ghora Lotan
Low	Sarya
Low	Brrah
Low	Gaurpar
Low	Devakali
Low	Utasiya
Low	Mahuran
Low	Hatabuzarg
Low	Unauli
Low	Pura Malahan
Low	Rampur Pande
Low	Avrakol
Low	Dubejot
Low	Loharapar
Low	Rampur Garari
Low	Karnauti
Low	Bhikhabhar Buzurg
Low	Khadra
Low	Samadhi
Low	Singhala
Low	Belnapar
Low	Chaura
Low	Shiurampur
Low	Bhikhabhar Bujurg
Low	Khirkita Digar
Low	Jalpahia
Low	Hatwa
Low	Sarahra
Low	Tariapar
Low	Gajubri
Low	Belapar
Low	Mathia
Low	Reman
Low	Abros
Low	Sahderwa
Low	Aswandpar
Low	Sarsara Buzurg
Low	Gangupat
Low	Bhusawal
Low	Durui
Low	Bhalwani
Low	Ratanpur
Low	Bhitaha
Low	Pandauli
Low	Kahla
Low	Kohri Buzurg
Low	Chhapra
Low	Kathwalia
Low	Malauli
Low	Sarsara Khurd
Low	Khirkita Dube
Low	Chirauwa
Low	Mungwar
Low	Chaunri
Low	Ahala
Low	Jamdara Plndarhi
Low	Kakarhi
Low	Khopapar
Low	Rampur
Low	Banwarpar
Low	Hariharpur
Low	Kohri Khurd
Low	Bhaisaon
Low	Rampur Baghaura
Low	Sardaha
Low	Belpar Pathak
Low	Ranidiha
Low	Baghi
Low	Naha
Low	Baraipur Urf Parauli
Low	Gopalpur
Low	Chandauli
Low	Pakri
Low	Reaon
Low	Ahiraull
Low	Misrauli
Low	Rawatpar
Low	Imilihwa
Low	Semra
Low	Beladar
Low	Khutbhar
Low	Dewaribari
Low	Bhawajitpur
Low	Pandepur
Low	Alavlpur
Low	Dhanrajpur
Low	Dighwa Buzurg
Low	Keshokol
Low	Pokhari Gon
Low	Ganjhara
Low	Bandrahi
Low	Parsa Urf Aglagawa
Low	Sihaeejpur
Low	Lamatia
Low	Paratapipur
Low	Baraipar
Low	Misrauli
Low	Daidiha
Low	Patharha Misra
Low	Ahirauli
Low	Bhirwa
Low	Kast Mishrauli
Low	Palhwapur
Low	Tilsar
Low	Garya Kol
Low	Kasht Misrauli
Low	Ligni Khurd
Low	Sati
Low	Jigni Buzurg (Bangaon)
Low	Gerwakhor
Low	Misrhrauli
Low	Atapar
Low	Tejwapar
Low	Chhitauna
Low	Sisai
Low	Kalani
Low	Rasulpur Misra
Low	Basantpur
Low	Kahra Khurd
Low	BIjai (Mirpjur)
Low	Dhanrajepur
Low	Avasthi
Low	Ramnagar
Low	Kotia Nayar
Low	Alipur
Low	Gaya Ghat
Low	Bharauli
Low	Dihulpar
Low	Raghunathpur
Low	Barparya Kaji
Low	Rajupur
Low	Kohara Bujurg
Low	Khaliya
Low	Beili Kund
Low	Parsia Nisfi Shukul
Low	Kharagpatti
Low	Nakauri
Low	Basahi
Low	Nargara Siva Datta Singh
Low	Samhutapur
Low	Ujjarpar
Low	Kast Bhawani Datt
Low	Gherya
Low	Akolha
Low	Marhiawa
Low	Ram Lakhan
Low	Patkhauli
Low	Katya
Low	Dhaka War Chak
Low	Unchagaon
Low	Munderi
Low	Bhabhya
Low	Nasirpur
Low	Jainpur
Low	Bhulan Chak
Low	Majgawan
Low	Patauha
Low	Parainia
Low	Lachchhi Chak
Low	Chandpar
Low	Damarpur/ Masha
Low	Parsia Nisfi Rawat
Low	Pichhaura
Low	Tiwaripur
Low	Bishunpur Raja
Low	Dilmanpur
Low	Paharpur
Low	Dudhawa
Low	Chareria
Low	Sonayeecha
Low	Inayat Chak
Low	Bhawanianpur
Low	Makarha
Low	Barhia Khurd
Low	Tikari
Low	Asthaula
Low	Samadpur
Low	Barhia Khurd
Low	Raepur
Low	Karwal
Low	Jitwarpur
Low	Doodapar
Low	Parasi
Low	Saram
Low	Math Ajudhio
Low	Arazi Mundiari
Low	Narayanpur
Low	Lagunahi
Low	Bila Berbhan
Low	Rapatpur
Low	Nagwa Bhagwan
Low	Tarkhop
Low	Purwa
Low	Lona Nagar
Low	Birti
Low	Bagha Kund
Low	Nagwa Pem
Low	Murarpur
Low	MALUN
Low	Parhati
Low	Chak Saraiya
Low	Dharsi
Low	Tikapur
Low	Dumri
Low	Chautara Babu
Low	Bulaki Chak
Low	Kukurha
Low	Bankat
Low	Bhataura
Low	Dhuriadih
Low	Paharpur
Low	Ahirauli
Low	Ranipar
Low	Pimgarh(Itauwa)
Low	Senuapar
Low	Manjharia Taluk Dhyanpur
Low	Dhabia
Low	Allahyarpur
Low	Kusmauli
Low	Khandra
Low	Meerpur
Low	Jharna
Low	Parwarpar
Low	Malpur
Low	Pakar Parwa
Low	Jhae
Low	Chilua
Low	Dakahi
Low	Narre Buzurg
Low	Barhia Buzurg
Low	Bheri
Low	Dudh Kunda
Low	Baupar
Low	Domaria
Low	Chak Khajir Khijir
Low	Manjharia
Low	Beili Khurd
Low	Ratanpura
Low	Gobrayeea
Low	Fatehpur
Low	Jagdispur
Low	Pandepar
Low	Harpur
Low	Lakhayee Deeh Khurd
Low	Mubaridpur
Low	SASNAN
Low	Math Kesho
Low	Mathdharmsen
Low	Shukulpur
Low	Tandwa
Low	Marar
Low	Rajgarh
Low	Babhnauli
Low	Chhitauni Bujurg
Low	Kasht Kashi Naik
Low	Gosaepur
Low	Deokali
Low	Lakhnapar
Low	Tiwaripur
Low	Dewapar
Low	Naraudan
Low	Goura
Low	Bath Khurd
Low	Sakari
Low	Hamidpur
Low	Keradih
Low	Chhitauni Khurd
Low	Jadwapur
Low	Dhaurahra
Low	Dayalpur
Low	Jaiti
Low	Chak Mali
Low	Sohnag
Low	Pipari Khurd
Low	Bhainsaha Buzurg
Low	Saneha
Low	Mukarimpur
Low	Akolahi
Low	Kusmaura Buzurg
Low	Narre Buzurg
Low	Shahpur
Low	Marha
Low	Barhajpur
Low	Mirari
Low	Mahulia
Low	Chhitauni Bhim
Low	Saharua
Low	Siswa Babu
Low	Kundahi
Low	Bijio
Low	Lakhayee Deeh Buzurg
Low	Ranjitgarh
Low	Bandwari
Low	Soukhor Khurd
Low	Lalchak
Low	Narre Khurd
Low	Mohan Chak
Low	Pachperwa
Low	Bath Buzurg
Low	Rukunpur
Low	Bhawanianpur
Low	Bharwaliya
Low	Sarraiya
Low	Akauna Bujurg
Low	Suarha
Low	Deorajpar
Low	Gaur Ganj
Low	Barpar Mafi
Low	Rauza Dargah
Low	MAHARAJPUR KHURD
Low	Ganga Chak
Low	Hatwa
Low	Rasulpur Babu
Low	Bhrsi Khurd
Low	Soukhor Bujurg
Low	Ladshmipur
Low	Hariharsir Buzurg
Low	Belwa Dari
Low	Chakrupaia
Low	Arazi Hariharsir Buzurg
Low	Pachma
Low	Asapar
Low	Gobindapur
Low	Khabhra
Low	Marautia
Low	Harhabhar
Low	Bharsi Buzurg
Low	Deorajpur Khurd
Low	Rampur Santha
Low	Hatwa (Gagha)
Low	Dehari Bhar
Low	Nagwan
Low	Bankot
Low	Chaparhat
Low	Guvari
Low	Kharagpur
Low	Rohari
Low	Newada
Low	Thatouli
Low	Godhana
Low	Omri Majhario
Low	Mahnapar
Low	Singhpur
Low	Narsingh Dih
Low	Gopalpar
Low	Belghat
Low	Rajnauli
Low	Mohanpur
Low	Sigaura
Low	Bans Gagha
Low	Dandi Khas
Low	Tandwa Bahlim
Low	Haraiya Urf Mathura
Low	Katkoli
Low	Gharawal
Low	Rampur
Low	Kathha Khair Garha
Low	ARAI DIH
Low	Dumn
Low	Purnaha
Low	Sukrouli
Low	Ghosaon
Low	Bela
Low	Pipra Pathak
Low	Brahmadeva
Low	Kathaka
Low	Kanchanpur
Low	MAHARAJPUR BUZURG
Low	Tinduhani
Low	Muhiuddinpur
Low	Akauna Khurd
Low	Karanrai Jiukar
Low	Asapar
Low	Gangwal
Low	Tikwa Madho
Low	Bonrepar
Low	Baghar
Low	Mehdia (Gogho)
Low	Lahra Miran
Low	Itkari
Low	Hem Chaura
Low	Menseer
Low	Tikwa Darzi
Low	Gauwara
Low	Tikuliadar
Low	Sear Jot Bihari
Low	Sidhari
Low	Barhiari
Low	Birai Buzurg
Low	Dhunia Pura
Low	Kusaha
Low	Lohidandi Buzurg
Low	Shankarpur
Low	Bistuie
Low	Rahdauli
Low	Kakrahi
Low	Kauadil
Low	Timha
Low	Sopae
Low	Raghunathpur Dhakwa
Low	Mahedaiaon
Low	Birai Khurd
Low	Pursauli
Low	Lahara Jamal
Low	Lahidandi Khurd
Low	Chak Daud
Low	Alavalpur
Low	Karanpur
Low	Bhatandi Mannulal
Low	Tikwa Chatur
Low	Rajpur
Low	Amanabad
Low	Kusaldiha
Low	Searam Adhin Singh
Low	Bhunwanion
Low	Khajuri
Low	Katha Babu
Low	Tikwi Birsahi
Low	Bhatandi Padarathdas
Low	Biskarpur
Low	URIANPUR
Low	Bishunpura
Low	Majhagawan
Low	Bhupgarh
Low	Jogdespur
Low	Tijpur
Low	Dimusa
Low	Bahra Dandi
Low	Chhitauna
Low	Dhorae Par
Low	Bidhanpar
Low	Baghmauwa
Low	Chak Farid
Low	Bahadurpur Khurd
Low	Belkur
Low	Bilaspur
Low	Harpur
Low	Kotiya Bishuni
Low	Baikunthpur
Low	Katia Babu
Low	Bala Chak
Low	Bahadurpur Bujurg
Low	Madhopur
Low	Barai Purwa
Low	Jhanjwa
Low	Pursouli
Low	Nawadih Khurd
Low	Ram Gosae
Low	Math Bhatandi
Low	Sir Khurd
Low	Kapwa
Low	Sultanpur
Low	Parari
Low	Chorar Khas
Low	Bansipur Urf Shahpur
Low	Ban Purwa
Low	Bharaulia
Low	Bharauliya
Low	Utama
Low	Vishunpur Urf Shahpur
Low	Gajpur
Low	Belhi
Low	Jonipur
Low	BANKATI
Low	Shakardiha
Low	Dheku Nadh
Low	Matiyaria
Low	Chautra Patti
Low	Jamin Govraur
Low	Maur
Low	Chautra Tiwari
Low	Jagakol
Low	Maur
Low	Urwa
Low	Tikuli Banaras
Low	Sir Buzurg
Low	Murarpur
Low	Gunwan Dih
Low	Tighra
Low	Khajuri
Low	Govraur
Low	Nakaujha
Low	Kakrahi
Low	Neoro
Low	Balia
Low	Lakhua Pakar
Low	Chakkhan Jaheer
Low	Naithi
Low	Bilwa
Low	Parshadipur
Low	Harlalpura
Low	Ghunchiari
Low	Jhinkhini
Low	Dohiyak
Low	Shiurajpur
Low	Tari
Low	Musori
Low	Pipri
Low	Harauli
Low	Ikauna
Low	Turkvalia
Low	Kotia Patti
Low	Jamin Kaithi
Low	Parsia
Low	Onapar
Low	Kotia Kolahal
Low	Kurauli
Low	Kisunpur
Low	Patkhauli
Low	Kanjarpar
Low	Chachairam
Low	Samvapur
Low	Phulpur
Low	Benipur Urf Bishunpur
Low	Bhatadiha
Low	Mana
Low	Bhalwan
Low	Sarahapura
Low	Bramhasari
Low	Chaudia Masan
Low	Baghauli
Low	Jhajhawa
Low	Saraiya Belwari
Low	Kukraha
Low	Bansipur
Low	Jangal
Low	Mathia Musesa
Low	Dubauli
Low	Parsa Khurd
Low	Narayanpura Buzurg
Low	Chaknurvaph
Low	Kaithi Bujurg
Low	Parouli
Low	Gajpur
Low	Shankarpur
Low	MASAN PAKAR
Low	Pachauhan
Low	Dehra Tiker
Low	Marwatia
Low	Narayanpur Khurd
Low	Bhitari
Low	Purag
Low	Kalu Chak
Low	Sahaspar Khurd
Low	Patisa
Low	Belvatilakram
Low	Rampur
Low	Palhipar
Low	Bhalwan
Low	Sati
Low	Dhamachia
Low	Sahdodand
Low	Jagarnathpur
Low	Harkhora
Low	Bhaluan
Low	Barparva Babu
Low	Nagwan
Low	Parsa Buzurg
Low	Barpar
Low	Charbata
Low	Varla
Low	Trilokpur
Low	Basudiha
Low	Sahaspar
Low	Adhoripur
Low	Bhagta
Low	Keshwapar
Low	Gaur Khas
Low	Gambhirpur
Low	Dubripura
Low	Siyar
Low	Balua Bhawani Baksasingh
Low	Bhisiya Bujurg
Low	Majhganwa
Low	Salarpur
Low	Digurpura
Low	Mitanpur Khurd
Low	Umaria
Low	Birti
Low	Mitanpur Buzurg
Low	Jagdeeshpur
Low	Pipersandi
Low	Udepur
Low	Kohara
Low	Parsadewa
Low	Sisayal
Low	Patharha Babu
Low	Keshavapur
Low	PIPARDND
Low	Kuwa
Low	Thate Khas
Low	Math Durbasa
Low	Kuri
Low	Deokali
Low	Nagwa
Low	Bharasi
Low	Chandi
Low	Barha Buzurg
Low	Kalani Tandwa
Low	Lakuri Nisfi Babu
Low	Khasuha
Low	Mundera
Low	Dangipar
Low	Nakauri Khas
Low	Kurhari
Low	Chak Bhola
Low	Araon Jagdes
Low	Patkhauli
Low	Baidauli
Low	Bamhanpura
Low	Mathauli
Low	Anirudhpur
Low	Banspar
Low	Kaidaha Khurd
Low	Banionpar
Low	Mathanian
Low	Khankhar
Low	Math Parasram
Low	Bandhwa
Low	Chakraghodas
Low	Dandail
Low	Bhisia Khurd
Low	Singha
Low	Nagahara
Low	Chhapara
Low	Rajgarh
Low	Bhera Pakar
Low	Ranipur
Low	Barauli
Low	Aslabhar
Low	Ajamata
Low	Surha
Low	Kaidaha Buzurg
Low	Marchi
Low	Kastmitai Tiwari
Low	Marcha
Low	Bhainsahi Khurd
Low	Govindpur
Low	Tiar Khas
Low	Jiopar
Low	Garh
Low	Pakri Dube
Low	Bariar
Low	Jamin Bishunpura
Low	Chitauna
Low	Rohua
Low	Parpurwa
Low	Mahuja
Low	Kuei
Low	Tendua
Low	Bhawanigarh
Low	Alavalpur
Low	Baidauli
Low	Manikapar
Low	Lerwabari Buzurg
Low	Chetankak Domwar
Low	Bhatpar
Low	Manikapar
Low	Gajpur
Low	Mahopar
Low	Darihath
Low	Satora
Low	Katwa Udani
Low	Sati
Low	Belsari Buzurg
Low	Shambhupur
Low	Jagarnathpur
Low	Paresapar
Low	Basantpur
Low	Santhi
Low	Jhauwa Khurd
Low	Bhainsahi
Low	Newas
Low	Malan
Low	Sajiwan
Low	Kanta
Low	Misraulia
Low	Baranw
Low	Bhat Purwa
Low	Chawaria Khurd
Low	Tengri
Low	Lerwabari Khurd
Low	Ganeshpur
Low	rAMDIH
Low	Vijai Basaratpur
Low	Uncher
Low	DUMRI
Low	Bathwa Buzurg
Low	Ghipjokhar
Low	Majhili
Low	hARDATPUR
Low	Mallah Purwa
Low	Natwabar
Low	Ahirauli
Low	Chandi
Low	Mathia
Low	Shulkalpura
Low	Girdharpur Solanki
Low	Banjaria
Low	Lalmanpura
Low	Katka
Low	Harijanpur
Low	Jhajhwa
Low	Sahdewapar
Low	Jhauwa Kalan
Low	Rani Bhainsa
Low	Chauria Buzurg
Low	Chaukari
Low	Rani Bhainsa
Low	Sahdewapar
Low	Harijgnpur
Low	Jhajhwa
Low	Baikunthpur
Low	Ahirauli
Low	MATHIA
Low	Dharamshala
Low	Banjaria
Low	Yadav Pali
Low	Sikri Dih Buzurg
Low	Chauria Buzurg
Low	Harpur
Low	Launra
Low	Naraichpar
Low	Bhaiya Jot
Low	Kauwaram Khurd
Low	Girdharpur Dube
Low	Kanaicha
Low	Hariharpur
Low	Dhaunsa
Low	Bardiha
Low	Harpur
Low	RawatPar
Low	Lakhnaura
Low	Kusphara
Low	Pandepur (Jagdispur)
Low	Purwapar
Low	Besahni
Low	Ismailpur
Low	Girdharpur Chaube
Low	Bhita
Low	Koeran
Low	Kotia
Low	Bharaulia Karan
Low	Khujra
Low	Sikriganj
Low	Maraiya
Low	Purwa
Low	Paltupur
Low	Baswarigaon
Low	Gulriha
Low	DhanrinJot
Low	Beleari Purwa
Low	Purnoha
Low	Gaurijitpur
Low	Gopalpur
Low	Mundera
Low	Majhauwa
Low	Kasht Neara
Low	Harredan Khurd
Low	Patkhauli
Low	Piparpanti
Low	Kopwa
Low	Darhul Kamal Chak
Low	Gadaria Purwa
Low	Imli Dih Buzurg
Low	Dariha Buzurg
Low	Masidia
Low	Pali
Low	Thunhi Mahob Chak
Low	Deodanr (Gopalpur)
Low	Gajari
Low	Nimdanr
Low	Pandit Shukulpura
Low	Mahupar
Low	Reora Dih
Low	Karouta
Low	Harredanr Buzurg
Low	Leruapar
Low	Rasait
Low	Bharwaliya Buzurg
Low	Tengri
Low	Hata Buzurg
Low	Hata Khurd
Low	Balua
Low	Bela Khurd
Low	Imli Dih Khurd
Low	BELDARIPUR
Low	Bargaon Sharki
Low	Jadupur
Low	Telibhar(Bishunpura)
Low	Kanapar
Low	Sultani
Low	Tighra Khurd
Low	Keotan
Low	Lachhmipur
Low	Hargana
Low	Jadu Patti
Low	Neora
Low	Teonan
Low	Kudaria
Low	Lunian
Low	Gobraur
Low	Chuntaha
Low	Sahwapar
Low	Bela Buzurg
Low	Tighra Patwari
Low	Pakri
Low	Pitambarpur
Low	Bohabar
Low	Bhatpurwa
Low	Patti Bargaon Samogar
Low	Tendua
Low	Anrrauli
Low	Budhanpur Buzurg
Low	Dariha Khurd
Low	Bastupar
Low	Ahirauli Buzurg
Low	Sarar Majhgawan
Low	Kataia
Low	Lakhan Khurd
Low	Suaraha
Low	Keotan
Low	Patti Bargaon Saraunan
Low	Matha
Low	Gain Bela
Low	Mahelwar
Low	Pandepar
Low	Dhusuna
Low	Tulsipakar
Low	Kunaha
Low	Amwa
Low	Sai Khurd
Low	Bhiti
Low	Patkhauli
Low	Basawanpur
Low	Patraitha
Low	Ragghupur
Low	Khuruhuri Chhoti
Low	Narayanpur
Low	Baram Ka Than
Low	Sai Buzurg
Low	Baksauri
Low	Atkawali
Low	Pipraitha
Low	Tighra Rudarman
Low	Sugaha
Low	Bankati Khurd
Low	Ahuirauli Khurd
Low	Dhaski
Low	Nasirpur
Low	Lakhan Buzurg
Low	Harraiya
Low	Kandhla
Low	Barpalwa
Low	Bharthari
Low	Jamru
Low	Dhanaura Buzurg
Low	Singhpur
Low	Palahpur
Low	Bar Purwa
Low	Somahi
Low	Bankati Buzurg
Low	Mau Buzurg
Low	Potrutola
Low	Noukapura
Low	Panar Purwa arazi
Low	Kasht Triphala
Low	Sarauna
Low	Mathia
Low	Madhotola
Low	Saharia
Low	Dewarbir
Low	Kotia Amansingh
Low	Ultha Buzurg
Low	Baripur Jagarnathpur
Low	Sakharua
Low	Lalpur
Low	Siharwa
Low	Satahwa Chak
Low	Belwa Khurd
Low	Misraulia
Low	Bharoulia
Low	Dhanaura Khurd
Low	Sukrauli
Low	Misraulia
Low	Pachperia
Low	Soti
Low	Patkhauli Purwa
Low	Mau Khurd
Low	Ahir Purwa
Low	GajaiKol
Low	Bamaura(Bhamaura)
Low	Karwania Purwa
Low	Dhaska
Low	Gunraitola
Low	Ultha Khurd
Low	Kasht Sukhdeo Purwa
Low	Kalaura
Low	Pachisi
Low	Sirsia
Low	Pindh
Low	Jariahia
Low	Dhebra Buzurg
Low	Usuni
Low	Mahuja
Low	Bhiti Khurd
Low	Kotia
Low	Masi
Low	Amari
Low	Siswa (sinwa)
Low	Bahorwa
Low	Jamni Joa
Low	Keotantola
Low	Balua
Low	Deoria
Low	Neorl
Low	Tighra Tehra
Low	Daswantpur(Jaswantpur)
Low	Bairwa
Low	Narainapar
Low	Belparg
Low	Bishunpur
Low	Malkatola
Low	Malauli
Low	Gohlia
Low	Kalani
Low	Shaikh Purwa(Purwa Musalman)
Low	SAHTAUL
Low	Khamua Padam
Low	Bhatas
Low	Ranipur
Low	Maha Dih
Low	KANTA
Low	Ahirantola
Low	Belwa Buzurg
Low	Tiwaripur
Low	Madhapur
Low	Gurmhi
Low	Pindra
Low	Narainapur
Low	Gunwari
Low	Babhnauli
Low	Barihari
Low	Haraja
Low	Nadua Gajanpur
Low	Khajuria
Low	Mathia
Low	Soharwa
Low	Kauriram
Low	Kablaspur
Low	Loniatola
Low	Loharpur
Low	Kutia
Low	Bhitaha
Low	Dhakwa
Low	Bhakurha
Low	Basauli Buzurg
Low	Pipraha
Low	Bautha
Low	Mohan Bedauli
Low	Keotantola
Low	Baidauli
Low	Bhatauli Khurd
Low	Beldaripur
Low	Ekdanga
Low	BAIRIA
Low	Dhobauli Gaharwar
Low	Sonai Khurd
Low	BHAGWAN CHAK DOHARIA
Low	Dumn Raby
Low	Manjharla
Low	Sanro
Low	Hundri
Low	Bendwapar
Low	Gobrauri
Low	Dubauli
Low	Gursairi
Low	Sohgaura
Low	Sahasraon
Low	Domari
Low	Bairihwa
Low	Barigaon
Low	Majhgawan
Low	Bhitkhori
Low	Rautpar
Low	Barpurwa
Low	Belman
Low	Aktahia
Low	Shikargaoh
Low	Usrain
Low	Mathia
Low	Sahua
Low	Tikar
Low	Atrauli
Low	Kintubhar
Low	Parshadipur
Low	Malhanpar
Low	Baghaura
Low	Bhainsa
Low	Kaithauli
Low	Lahidandi
Low	Hundra
Low	Rataripura
Low	Sonai Buzurg
Low	Gauri Buzurg
Low	Khajahia
Low	Karwania
Low	Goplapur
Moderate	Pochia
Low	Chakia
Low	Kaithauli
Low	Chhedidandwa
Low	Koni Khurd
Low	Deorar
Low	Basauli Khurd
Low	Nokhaipura
Low	Ranapor
Low	Tighra
Low	Dumri
Low	Manjharia
Low	Pakardiha
Low	Diliaghat
Low	Gobraur
Low	Baghrain
Low	Bahidandi
Low	Shah Patti
Low	Masuria
Low	Bhaiyapura
Low	Saintar
Low	Bhaiyapura
Low	Koni Buzurg
Low	Dandwa Manohar
Low	Kasht Deor
Low	Jagdishpur
Low	Ekll
Low	Dhusi
Low	Barigaon
Low	Bhiti
Low	Raghunathpur
Low	Marautia
Low	Mahuapar
Low	Jayantipur
Low	Bar Purwa
Low	Jahaurabad
Low	Shaikh Bheora
Low	Bedauli Paltan Singh
Low	Kanwarpura
Low	Lalpur
Low	Ganeshpur
Moderate	Kukurbhukwd
Low	Phulhar Buzurg
Low	Gauri Khurd
Low	Gerua Parsaunan
Low	Dighaur
Low	Bijra Tal
Low	Banse
Low	Dishunpur Matiara
Low	Hariharpur
Low	Sujanpura
Low	Amwa
Low	Tikri Khurd
Low	Amarpur
Low	Kaparphorwa
Low	Chandpar
Low	Itaua
Low	Silhata
Low	Kasht Bhoj
Low	Naipura
Low	Barhyapar(Bhadar)
Low	Bharaulia
Low	Naipura
Low	Uska
Low	Asekhoo
Moderate	Mitthabel
Low	Dulahra
Moderate	Panrar
Low	Jari
Low	Mashapar
Low	Lachhmipur
Low	Mahuar Kol
Low	Donkha Chand
Low	Tikri Buzurg
Low	Phulhar Khurd
Moderate	Harpur
Moderate	Narendarpur
Low	Chandpur
Low	Deorar Baboo
Low	Lalpur
Low	Ratanpura Babu
Low	Bankata
Low	Bharkachha
Low	Khaorha Dewar
Low	Pinria
Low	Pandepura
Low	Kotsikra
Low	Balua Gopalpur
Low	Bijaura
Low	Ahirpurwa
Low	Chhatiari
Low	Hardani
Low	Sanwa
Low	Hariharpur
Low	Dubauli
Moderate	Mohanpur
Low	Chorbhari
Low	Tanwahia
Low	Diwa
Low	Nakaha
Low	Dumraila
Low	BARDIHA
High	Uttarka
Low	Ufrauli
Low	Mahdewa
Low	Majhari Purwa
Low	Chhitahri
Moderate	Nakwar Ghat
Low	Chaitra
Low	Baraban(Badain)
High	Barwa
Low	Lakaria
Low	Pharndia Buzurg
Low	Katharia
Low	Pakhanpur
Low	Nakeahian
Low	Gochharan
Low	Baitaba
Low	Bhilaha Pande
Low	Kharkhunta
Low	Nakwar
Moderate	Nibhi
Low	Danwa Chatur
Low	Amauli
Low	Baraitola
Low	Komalpura
Low	Barpar Ponde
Moderate	Karouni
Low	Kunarpar
Low	Budhaura
Low	Beldaripura
Low	Kutiya
Low	Darzi Purwa
Low	Matiara
Low	Teliabhar
Low	Baklaha
Moderate	Phailah
Low	Patkhauli
Moderate	Nouabari
Low	Sahridand
Low	Jigna Bhaon
Low	Baur Dih
Low	Pharandia Khurd
Low	Kishunpur
Low	Danwa Chatur
Moderate	Belahi
Low	Bishunpura
Low	Baijnatha
Low	Danri
Low	Bhaurahi
Low	Malhanpar Khurd
Low	Pachhimpura
Low	Gerua
Low	Phului
Low	Baraipar
Low	Katwar
Moderate	Pandeori
Moderate	Bairahi
Low	Maghipar
Low	Bhagour
High	Longiadih
Low	Gularia
Low	Budhaura
Low	Batahra
Moderate	Nakwar
Low	Danwan
Low	Bhaironpur
Moderate	Ghoth
Low	Balo Chak
Low	Kataharwa
Low	Jogia
Low	Math Biharidas
Low	Raghua Dih Buzurg
High	Lilkanth Sahi
Low	Sairon
Low	Roha
Moderate	Harilwa
Low	Kalyanpur
Low	Nonav
Low	Bhagne
Moderate	Kormaita
Moderate	Khutaha
Low	Dandi Rawat
Low	Hatwar
Low	Jairam Kol
Low	GOCHHWAL
Low	Jagdishpur
Low	Bhainsa Harihar
Low	Barohi
Low	Israuli
Low	Singra
Low	Kohatarup
Low	Dangipar
Moderate	Lachhmpur
High	Barahra
Low	Baraila Tal
Moderate	Bankatia
Low	Bharohia
Low	Parsia
Low	Musrad
Low	Nagwa
Low	Manjharia Khurd
Low	Jalti
Low	Barohri
Low	aunrarup
Low	Kasihar
Low	Kothaghurhu
High	Raghunandanpur
Moderate	Raghupatti
Low	Newas
Moderate	Keotantola
Low	Kandhauli(Kanhauli)
Low	Kewtan
Moderate	Lalapur
Low	BASDILA
Low	Pagar
Moderate	Piprapat
Low	Purniha
Low	Sakhuana
Low	Sonahna
Moderate	Kulran
Low	Raghua Dih Khurd
Low	SUKHNIA
Low	Dandwa Ramchandar
Low	Hardia
Low	Saraighat
Low	Parai Danr
Low	Dadaura
Low	Sarsopar
Low	Kuchaita
Moderate	Bangla
Moderate	Barwatola
Low	Arazi Mahuapar
High	Bodhi Chhapar
Low	Mahmoodpur
Low	Basuhi
Low	Kothaghurhu
Low	Gorsaira
Moderate	Ahirantola
Low	Bhatpar
Low	Mator
Moderate	Padri
Low	Chaubepura
High	Chainpur
High	Nunia
Low	Bastia
Moderate	Belwa
Moderate	Rampur
Low	Barahi Purwa(Bar Purwa)
Low	Situapur
Low	Loharpurwa
Low	Dihghat
Low	Dadoora
Low	Pinria
Moderate	Barampur
Low	Amraiya
Low	Pakarghat(Dhebri)
Low	Dughra
High	Duldulia
Low	Silhata Mundera
High	Bankata Bazar
Moderate	Kuiran
Low	Deorar Babu
Low	Sairon
Low	Paikauli
Low	Baidauli Baijnathsingh
Low	Darha Khurd
High	Sherpur Barahra
Low	Chandhar
High	Jagat Gobind
Low	Pasitola
Low	Bharwal
High	Chhota
Low	Got Ki jot
Low	Kandhauli
Low	Mahmudpur
Low	Bhuswal Khurd
Low	Pakri Damadar
Low	Majhauwa
High	Simri
Low	Mahuapar
Moderate	Shukul Jot
Low	Rashnapar
Moderate	Solabhartola
Low	Bheusa
Moderate	Amghat
Low	Tonrai
High	Balewa
Low	Etaura
Moderate	Sonbarsatala
Low	Mahansi
High	Karaundh
Low	Dhamaur
Low	Tongrl
Low	Bhatwali
Low	Semra
Moderate	Nauki Bazar
Low	Belhra
High	Narainpur
Low	Updhaulia
Low	Ghaisra
Low	Murdewa Chok
Low	Ina Dih
Low	Malaon
Low	Kharhari
Low	Bamhan Bhainsa
Low	Rajpur
Low	Khadiapar
Moderate	Baijudiha
Moderate	Bhotuha
Low	CHAK RAJAPUR
Low	Deoghata
Low	Kanail
Moderate	Bishunpura
Low	Bistauli Buzurg
Low	Katia
Moderate	Kol Pahia
Moderate	Nakahatola
Low	Karahi
Low	Karahi
Low	Bhitaha Kumwar
Moderate	Hathkhal
Low	Bistauli Khurd
Low	Bhainsa
Low	Karwania
Low	Dhanauji
Moderate	Piprahia
Low	Bhera Chak
Low	Bharohia
Low	Belipar
Low	Banaitha
Low	Bhatiari
Low	Bhuswal Buzurg
Low	Jigina Tiwari
Low	Ghasaria
Low	Gohipur
High	Bhatahi
Moderate	Kuiran
Low	Deokali Khurd
Low	RIKWA
Low	Gohli Basant
Low	Sonra
High	Belwa Alamdas
Low	Mathia
Low	Aunji
Moderate	Naukatola
Low	Rajwal
Moderate	Majhwa
High	Dharam Rai
Low	Karhal
High	Bhatahi Khurd
Low	Gobind Chak
Low	Bandua Chatur
Low	Jhinga Babu
Low	Paisa
Moderate	Parsia
Moderate	Natwa
Moderate	Ramnagar
Low	Katea
Low	Badra
Low	Gorra
Moderate	Naukatola
Moderate	Ghatull
Low	Ahiran
High	Sumahi
Low	Dhanaipur
High	Gushain
High	Bhatwa
Low	Kasehra
Low	Majhgawan
High	Hatwa
Low	Rajdhani
Low	Pipra
Moderate	Pirarahia
Low	Satahra Mohan
Low	Konan Sonbarsa
Low	Gopalpur
Moderate	Arah
Low	Ghorsari
Low	Bhasman
Low	Deokali Buzurg
Low	Chak Baid Purwa
Low	Bakuchi
Low	Kharauhan
Low	Biku Bhainsa
High	Khairatia
Moderate	Mathia
Low	Dhgnaipur
Low	Gopipur
Low	Panapar
Low	Karamdewa Buzurg
Moderate	Bhiswa
Low	Khanrha Deor
Low	Barhi
Moderate	Nilami
Low	Jaipalpur
Moderate	Balughata
Low	Beludjha
Low	Kharphara
Low	Bhuswa Buzurg
High	Rampur
Moderate	Tendua Khurd
Low	Gajari
High	Imlia
Low	Kaithwalian
Low	Karelabhari
Low	Bhitaha
Moderate	Katahriatola
High	Lohraulia
Low	Jigni Danr
Low	Karamdewa Khurd
Low	Bhiti
Low	Tengri
Moderate	Balghataghat
Moderate	Beni Jot
Low	Ghansahi
High	Bhanpur
Moderate	Dehra Dabar
Low	Bela
Low	Tenuha
Moderate	Hathkhal
Low	Kharphara
High	Uda Bhagat
Moderate	Shiva Pur
Low	Simrauna
Low	Sanwarupur
Low	Barhni
Low	Teurkhawan
High	Chakia
Low	Dhakrauli Dhubauli
Low	Thathaur
Low	Deonathpur
Moderate	Kharharwa
High	Bhatahi
Moderate	Mahual
High	Gushain
Low	Siar
Low	Kasimpur Jigni
Low	Atraura
Moderate	Karmajhatola
Low	Rupanari
High	Shankarpatti
High	Daria
Moderate	Pakwatola
Low	Naurdeor
Low	Barhawa
Low	Sarbasi
Low	Tulsi Pande
High	Barsatpur
High	Pachrulhra
Low	Daunrpar
High	Naktaha
Low	Unchgaon
Low	Aunrai
Low	Badara
Moderate	Barbasaha
Moderate	Bhaisahi Naresh
Low	Khiryahwa
Low	Charahla
Low	Unaula
High	Bharsandwa
Low	Balra
Low	Khairi
Low	Ainwan
Low	Jhunria
Low	Kuan Khurd
Low	Kuan Buzurg
Low	Banspar
Moderate	Ahirwati
Low	Chandlaha
High	Nathapatti
Moderate	Margia
High	Sumahi
Low	Sokahna
Moderate	Nauhar Sah
Low	Senwapar
Low	Khatalia
Low	Baraipar
Low	Jamauli Bujurg
High	Mahuabar
Low	Chakdah
Low	Garaina
Low	Gosampur
Low	Bahuripar
Low	Sisihwa
Low	Kalwari
Moderate	RESULAPUR JANGAL
Low	Benwa Tikar
Moderate	Naukatola
Moderate	Bahadurpur
Low	Kathiori
Low	Tama
Low	Piash
Low	Bheori Khargram
Moderate	Jakhnigaon
Low	Ekama
Moderate	Goraritola
Low	Deoriaza
Low	Chandauli Khurd
High	Pachrukhia
Moderate	Porsauni
Low	Ekma
Low	Raji
Low	Khainrati
Low	Koeripurwa
Low	ACHHEHWA
High	Patkhauli
Low	Mangalpur
Low	Aunrai
Low	Bahuripar Khurd
Low	Parsaun
Low	Baghaila
Low	Kaithauli
Moderate	Bhaisah
Moderate	Haphua Jiwan
Low	Deoara
Moderate	Ataria
Low	Bogeswaridevi Tanda
Low	Hardi Chak
Low	Jamauli Khurd
Low	Gidaha
Moderate	Haphua Chaturbhuj
Low	DEOKALI
Moderate	Kaurrtol
High	Bhulan Chhapra
Low	Bheori
Low	Bargadwa
Low	Katrar
Low	Chandauli Buzurg
Low	Lachhmanpur
High	Amarpur
High	Sumahi Khurd
Low	Kataicha Bindan
Low	Sonari Ramchandra
Low	Dubauli
Low	Digha
Low	Bilrahwa
High	Kastura
Low	Chautarwa
Low	Dhebra
Low	Aima
High	Mundera
Low	Shekhpura
Low	Sopara
Low	Kuin
High	Pitambarpur
Low	Chaka Nakdah
Low	Daria Dih
High	Pachrukhiatola
Low	lJolahbarl
Low	Bintolia
Moderate	Jagdishpur
Low	Pipra Bhairo
Moderate	Nainu Pahru
Moderate	Bahadurpur
Low	Mahuraiya
Low	Jagarnathpur
Moderate	Bishnathpur
Moderate	Salemgarh
Moderate	Miyan
Low	Chak Deiya
Low	Nagawan
Low	Chak
Low	Shalkhpurwa
Low	Suadda
Low	Dhauripar Parhya
Low	Mohnapur
Low	Thakaichpar
Low	Karjahi
Low	Dihapura
High	Pakariar
Moderate	Julaha
Low	Katrari
Moderate	Sukhdew Patti
High	Chaura
Moderate	Khakharwatola
Low	Charpan Khurd
Low	Harnahi
Low	Banaihta
High	Pharendaha
Low	Chak Bangla
Low	Ahamadpur
Low	Hata
Low	Panditpur
Low	Nawapar
Low	Supra
Low	Dubaria
Low	Murdewa
High	Chhattu Katea
Moderate	Solgarhi
Moderate	Rampur Bangra
Low	Neosa
Low	Bhainsahla
Low	Sonari Shankar
Low	Chakdahwa
Moderate	Taria Lachhiram
Low	Amdiha
Moderate	Jogidas Kuti
High	Bantel
Moderate	Kalthaulia
Low	Sannsi
High	Pakriar (Binwalia)
Low	Gondsaira
Low	Alapar
High	Chaura
Low	Pipra Manni
Low	Muria
Low	Natani
Low	Kolhat
Moderate	Lachhmipur
Moderate	Baghra
High	Srikishan Sahi
Low	Bhitaha
Low	Supri
Low	Charpan Buzurg
High	Tola Ramtawakal Sahi
Moderate	Jamsari
Moderate	Anirauli Dan
Moderate	Ram Dihal
Moderate	Saraia Khurd
Low	Gajar Jogais
Low	Rampur
Low	Khapria Bhar
Low	Satahwa
Low	Belhi
Low	Sangrampur
Low	Mahdeiya
Moderate	Harbanspatti
Low	Kusmaul
Moderate	Jamunia
Low	Jhakahi Baisan
Moderate	Naukatola
Low	Nakaitola
Low	Gopal Deoria
Low	Jhunria
Low	Barhara
High	Rampur
Low	Semeri
Moderate	Sukkika
High	Mathia
Low	Karpaiya
Low	Khajuri
Low	Raksa Babu
High	Lathaur
Low	Gahana
Low	Sahijana
Moderate	Pande
Low	Machauli
Low	Neosa
Moderate	Chhapra
Low	Gajar Bansman
Low	Chamrauti
Moderate	Taria Harkes
Low	Bhela Kharg
Low	Sohupar
Low	Dhaski Buzurg
High	Tarwanwan
Moderate	Khudra
Low	Bheosa
Moderate	Tinphiria
Moderate	Semra
Low	RAMPUR KHURD
Moderate	Gauri
Low	Pipra Ganga
Low	Jhakahi (Usmanpur)
Moderate	Sirampatti Mathia
High	Kumian
Low	Mohtan
Low	Sisai
Low	Bhaupur
Moderate	Jangol
Low	Deoria
Moderate	Siswa Buzurg
Low	Basawatola
Moderate	Dosoukdtha
High	Sonbarsa
Moderate	Amahia
Low	Pakri Mian
Low	Piprahia
Low	Nibia
Low	Moti Pakar
Low	Rakauli
Low	Gajarnarsingh
Low	Rehra
Moderate	Salemgarh
Moderate	Banjarwa
[truncated: 6,974 more rows]

## Sheet: Socioeco_Places
Socio-economic Class	Place Name
Low	Belthar
Low	Ajaipura
Low	Dalua
Low	Jaipar
Low	Barhalgang
Low	Mukundwar
Low	Budhanpura
Low	Jhajwa
Low	Basukhia Bujurg
Low	Rajauli Bjurg
Low	Dumari
Low	Ojhavali
Low	Newada
Low	Pohila
Low	Narhi
Low	Kharesari
Low	Belpar
Low	Rajauli Khurd
Low	Bhiti
Low	Bhiti Dube
Low	Basawanpur
Low	Mahuliya Khurd
Low	Bhasauli
Low	Rampur Garhwa
Low	Anand Garh
Low	Koerari
Low	Sidhi Gaur
Low	Madarha
Low	Misrauli
Low	Derwa
Low	Koerar
Low	Saraya Chak
Low	Chatauli
Low	Gaighat
Low	Barhaya Dube
Low	Gaurpar
Low	Gadhwa
Low	Nibi Tila
Low	Gartholi
Low	Saradaha
Low	Saeya
Low	Nakata
Low	Maibhara
Low	Nawachpar
Low	Mahuliya Poyal
Low	Nibi Dubey
Low	Kokata
Low	Kokta
Low	Bardiha
Low	Sansarpar
Low	Sidhuapar
Low	Bahadurabad
Low	Mangalpur
Low	Mahuapar
Low	Kohnra Bhorwar
Low	Bilwla
Low	Marawat
Low	Lakhnaura
Low	Dubauli
Low	Bishunpura
Low	Bishunpura
Low	Sidhuapar
Low	Saradah
Low	Khajuri Gosain
Low	Khajuri Pandey
Low	Nitwar
Low	Nibiseni
Low	Lakhnauri
Low	Berahua
Low	Bhatanipar Bujurg
Low	Ramjiwanpura
Low	Ramgarh
Low	Patna
Low	Kuraon
Low	Lacchmiipur
Low	Jhumila
Low	Chhapia Umraw
Low	Makarndpur
Low	Baraipar
Low	Distaulia
Low	Ratla
Low	Shukul Puri
Low	Pirahni
Low	Durgapur
Low	Baridiha
Low	Pushkar Bujurg
Low	Tiha Muhammadpur
Low	Parasia Tiwari
Low	Bhatanipur Khurd
Low	Nadua
Low	Devakali
Low	Hinguhar
Low	Bhatnipar Khurd
Low	Dhanauli
Low	Turkwalia
Low	Marwatia
Low	Baghuaiya
Low	Purapar
Low	Barhaj
Low	Bhadia Tilur
Low	Rampur Baghaura
Low	Dadra Dasht Mathanj
Low	Ahirauli
Low	Dhanauli
Low	Barahata
Low	Madaria
Low	Amhakpur
Low	Dhanaw
Low	Pushkar Khurd
Low	Khohia
Low	Narahan
Low	Duramha
Low	Markari
Low	Sarkara
Low	Sakat Pura
Low	Pauharia
Low	Dhudhuri
Low	Pipardari
Low	Dadra
Low	Barpar
Low	Mohammadpur
Low	Pirahani
Low	Maharajang
Low	Bimuti
Low	Rahua
Low	Kundwa Bari
Low	Pakauli Aman Chak
Low	Mundera
Low	Mathihani
Low	Ramanbari
Low	Babhnauli
Low	Khairpar
Low	Dhobauli
Low	Pharsar
Low	Amauli
Low	Pharsand
Low	Rajahata
Low	Atauli
Low	Chaubauli
Low	Asorgaht
Low	Kalhipar
Low	Parasia
Low	Bharroh
Low	Mehra
Low	Kusbhauna
Low	Saunkhor
Low	Lachhmipur
Low	Shlupur
Low	Chhitauna
Low	Sisawa
Low	Bheri Dih
Low	Manjhariya
Low	Besahani
Low	Sahruli
Low	Mundera
Low	Lakhanapar
Low	Marchipar Khurd
Low	Turkwalia
Low	Bhiti Bal
Low	Belawa
Low	Padmalpar
Low	Parari
Low	Sakra Khor
Low	Banjarha
Low	Sahrauli
Low	Ketkon
Low	Udaipur
Low	Bharwali
Low	Nuawa
Low	Chhapia
Low	Ramamau
Low	Patkhauli
Low	Chitthepar
Low	Paraini
Low	Belsari
Low	Bhatpar
Low	Karaundi
Low	Jamin Shukul
Low	Kolhuwa
Low	Marachipar Bujurg
Low	Beisara
Low	Bevari
Low	Manipur
Low	Bahpur
Low	Bhat Chak
Low	Surdapar Raja
Low	Shanichara
Low	Mau Buzurg
Low	Bhiti
Low	Murlipur
Low	Mehadraw
Low	Deep Garh
Low	Mahania
Low	Koili Khal
Low	Akbarabad
Low	Kolhua
Low	Konrar
Low	Saraiya
Low	Tara
Low	Nakati
Low	Parauli
Low	Bari Tarya
Low	Surdapar Shukl
Low	Gan Bazar
Low	Korar Nil Kanth
Low	Kast Subans Dubey
Low	Achhedih
Low	Dawanadih
Low	Bhiti
Low	Panditpur
Low	Newada
Low	Chainpura
Low	Bankata
Low	Khakhaijkhor
Low	Sakharwa Khurd
Low	Mahatopar
Low	Majhovalia
Low	Chak Bulaki
Low	Chikanian
Low	Madpur
Low	Baghagara
Low	Rudauli
Low	Bhat Purwa
Low	Katya
Low	Bhar Purwa
Low	Majhauliya Khas
Low	Jagdispur
Low	Jivchhin
Low	Ramkola
Low	Lugarapar
Low	Kauadil
Low	Sohrabir
Low	Chaukari
Low	Suaraj Khurd
Low	Palhnai
Low	Gahiraghat
Low	Phattepur
Low	Mamkhor
Low	Bisara
Low	Semari
Low	Mishrauli
Low	Semara Bujurg
Low	Bairia
Low	Gopalpur Kohna
Low	Ghosi
Low	Sonsatha
Low	Bhiti
Low	Dewaipipar
Low	Korari
Low	Suaraj Bujurg
Low	Chiraiyadani
Low	Kalyanpur
Low	Bhadaura
Low	Atraura
Low	Satora
Low	Bhaisahat
Low	Semara Khurd
Low	Sakharua Bujurg
Low	Kohana Gopalpur
Low	Loharpur
Low	Baraipar
Low	Fakirpura
Low	Rakauli
Low	Misrauli
Low	Mishrauli
Low	Barhara
Low	Barwal Shankarparshad
Low	Tiragaon Khurd
Low	Kauria
Low	Purania/Arjunpur
Low	Tiragaon
Low	Ranipur
Low	Baraila
Low	Barwal Ishriparshod
Low	Nauli
Low	Parsia Nispi Raja
Low	Barawal Digar
Low	Patra
Low	Baraipar
Low	Jharakata
Low	Lunia Purwa
Low	Pojupar
Low	Shanichara Patti Babu
Low	Manipur
Low	Gorasari
Low	Jugesra
Low	Zamin Lohrapur
Low	Bijuliadand
Low	Barago
Low	Tikaria
Low	Bairiyadih
Low	Pandepurtola
Low	Nevasa
Low	Dheorparmus.
Low	Majhaura
Low	Sahdauli
Low	Tikri
Low	Belana Par
Low	Bahasua
Low	Ranipur
Low	Dubauli
Low	Chimcha
Low	Karokand(Baranagar)
Low	Katghara
Low	Gopalpur
Low	Ghora Lotan
Low	Sarya
Low	Brrah
Low	Gaurpar
Low	Devakali
Low	Utasiya
Low	Mahuran
Low	Hatabuzarg
Low	Unauli
Low	Pura Malahan
Low	Rampur Pande
Low	Avrakol
Low	Dubejot
Low	Loharapar
Low	Rampur Garari
Low	Karnauti
Low	Bhikhabhar Buzurg
Low	Khadra
Low	Samadhi
Low	Singhala
Low	Belnapar
Low	Chaura
Low	Shiurampur
Low	Bhikhabhar Bujurg
Low	Khirkita Digar
Low	Jalpahia
Low	Hatwa
Low	Sarahra
Low	Tariapar
Low	Gajubri
Low	Belapar
Low	Mathia
Low	Reman
Low	Abros
Low	Sahderwa
Low	Aswandpar
Low	Sarsara Buzurg
Low	Gangupat
Low	Bhusawal
Low	Durui
Low	Bhalwani
Low	Ratanpur
Low	Bhitaha
Low	Pandauli
Low	Kahla
Low	Kohri Buzurg
Low	Chhapra
Low	Kathwalia
Low	Malauli
Low	Sarsara Khurd
Low	Khirkita Dube
Low	Chirauwa
Low	Mungwar
Low	Chaunri
Low	Ahala
Low	Jamdara Plndarhi
Low	Kakarhi
Low	Khopapar
Low	Rampur
Low	Banwarpar
Low	Hariharpur
Low	Kohri Khurd
Low	Bhaisaon
Low	Rampur Baghaura
Low	Sardaha
Low	Belpar Pathak
Low	Ranidiha
Low	Baghi
Low	Naha
Low	Baraipur Urf Parauli
Low	Gopalpur
Low	Chandauli
Low	Pakri
Low	Reaon
Low	Ahiraull
Low	Misrauli
Low	Rawatpar
Low	Imilihwa
Low	Semra
Low	Beladar
Low	Khutbhar
Low	Dewaribari
Low	Bhawajitpur
Low	Pandepur
Low	Alavlpur
Low	Dhanrajpur
Low	Dighwa Buzurg
Low	Keshokol
Low	Pokhari Gon
Low	Ganjhara
Low	Bandrahi
Low	Parsa Urf Aglagawa
Low	Sihaeejpur
Low	Lamatia
Low	Paratapipur
Low	Baraipar
Low	Misrauli
Low	Daidiha
Low	Patharha Misra
Low	Ahirauli
Low	Bhirwa
Low	Kast Mishrauli
Low	Palhwapur
Low	Tilsar
Low	Garya Kol
Low	Kasht Misrauli
Low	Ligni Khurd
Low	Sati
Low	Jigni Buzurg (Bangaon)
Low	Gerwakhor
Low	Misrhrauli
Low	Atapar
Low	Tejwapar
Low	Chhitauna
Low	Sisai
Low	Kalani
Low	Rasulpur Misra
Low	Basantpur
Low	Kahra Khurd
Low	BIjai (Mirpjur)
Low	Dhanrajepur
Low	Avasthi
Low	Ramnagar
Low	Kotia Nayar
Low	Alipur
Low	Gaya Ghat
Low	Bharauli
Low	Dihulpar
Low	Raghunathpur
Low	Barparya Kaji
Low	Rajupur
Low	Kohara Bujurg
Low	Khaliya
Low	Beili Kund
Low	Parsia Nisfi Shukul
Low	Kharagpatti
Low	Nakauri
Low	Basahi
Low	Nargara Siva Datta Singh
Low	Samhutapur
Low	Ujjarpar
Low	Kast Bhawani Datt
Low	Gherya
Low	Akolha
Low	Marhiawa
Low	Ram Lakhan
Low	Patkhauli
Low	Katya
Low	Dhaka War Chak
Low	Unchagaon
Low	Munderi
Low	Bhabhya
Low	Nasirpur
Low	Jainpur
Low	Bhulan Chak
Low	Majgawan
Low	Patauha
Low	Parainia
Low	Lachchhi Chak
Low	Chandpar
Low	Damarpur/ Masha
Low	Parsia Nisfi Rawat
Low	Pichhaura
Low	Tiwaripur
Low	Bishunpur Raja
Low	Dilmanpur
Low	Paharpur
Low	Dudhawa
Low	Chareria
Low	Sonayeecha
Low	Inayat Chak
Low	Bhawanianpur
Low	Makarha
Low	Barhia Khurd
Low	Tikari
Low	Asthaula
Low	Samadpur
Low	Barhia Khurd
Low	Raepur
Low	Karwal
Low	Jitwarpur
Low	Doodapar
Low	Parasi
Low	Saram
Low	Math Ajudhio
Low	Arazi Mundiari
Low	Narayanpur
Low	Lagunahi
Low	Bila Berbhan
Low	Rapatpur
Low	Nagwa Bhagwan
Low	Tarkhop
Low	Purwa
Low	Lona Nagar
Low	Birti
Low	Bagha Kund
Low	Nagwa Pem
Low	Murarpur
Low	MALUN
Low	Parhati
Low	Chak Saraiya
Low	Dharsi
Low	Tikapur
Low	Dumri
Low	Chautara Babu
Low	Bulaki Chak
Low	Kukurha
Low	Bankat
Low	Bhataura
Low	Dhuriadih
Low	Paharpur
Low	Ahirauli
Low	Ranipar
Low	Pimgarh(Itauwa)
Low	Senuapar
Low	Manjharia Taluk Dhyanpur
Low	Dhabia
Low	Allahyarpur
Low	Kusmauli
Low	Khandra
Low	Meerpur
Low	Jharna
Low	Parwarpar
Low	Malpur
Low	Pakar Parwa
Low	Jhae
Low	Chilua
Low	Dakahi
Low	Narre Buzurg
Low	Barhia Buzurg
Low	Bheri
Low	Dudh Kunda
Low	Baupar
Low	Domaria
Low	Chak Khajir Khijir
Low	Manjharia
Low	Beili Khurd
Low	Ratanpura
Low	Gobrayeea
Low	Fatehpur
Low	Jagdispur
Low	Pandepar
Low	Harpur
Low	Lakhayee Deeh Khurd
Low	Mubaridpur
Low	SASNAN
Low	Math Kesho
Low	Mathdharmsen
Low	Shukulpur
Low	Tandwa
Low	Marar
Low	Rajgarh
Low	Babhnauli
Low	Chhitauni Bujurg
Low	Kasht Kashi Naik
Low	Gosaepur
Low	Deokali
Low	Lakhnapar
Low	Tiwaripur
Low	Dewapar
Low	Naraudan
Low	Goura
Low	Bath Khurd
Low	Sakari
Low	Hamidpur
Low	Keradih
Low	Chhitauni Khurd
Low	Jadwapur
Low	Dhaurahra
Low	Dayalpur
Low	Jaiti
Low	Chak Mali
Low	Sohnag
Low	Pipari Khurd
Low	Bhainsaha Buzurg
Low	Saneha
Low	Mukarimpur
Low	Akolahi
Low	Kusmaura Buzurg
Low	Narre Buzurg
Low	Shahpur
Low	Marha
Low	Barhajpur
Low	Mirari
Low	Mahulia
Low	Chhitauni Bhim
Low	Saharua
Low	Siswa Babu
Low	Kundahi
Low	Bijio
Low	Lakhayee Deeh Buzurg
Low	Ranjitgarh
Low	Bandwari
Low	Soukhor Khurd
Low	Lalchak
Low	Narre Khurd
Low	Mohan Chak
Low	Pachperwa
Low	Bath Buzurg
Low	Rukunpur
Low	Bhawanianpur
Low	Bharwaliya
Low	Sarraiya
Low	Akauna Bujurg
Low	Suarha
Low	Deorajpar
Low	Gaur Ganj
Low	Barpar Mafi
Low	Rauza Dargah
Low	MAHARAJPUR KHURD
Low	Ganga Chak
Low	Hatwa
Low	Rasulpur Babu
Low	Bhrsi Khurd
Low	Soukhor Bujurg
Low	Ladshmipur
Low	Hariharsir Buzurg
Low	Belwa Dari
Low	Chakrupaia
Low	Arazi Hariharsir Buzurg
Low	Pachma
Low	Asapar
Low	Gobindapur
Low	Khabhra
Low	Marautia
Low	Harhabhar
Low	Bharsi Buzurg
Low	Deorajpur Khurd
Low	Rampur Santha
Low	Hatwa (Gagha)
Low	Dehari Bhar
Low	Nagwan
Low	Bankot
Low	Chaparhat
Low	Guvari
Low	Kharagpur
Low	Rohari
Low	Newada
Low	Thatouli
Low	Godhana
Low	Omri Majhario
Low	Mahnapar
Low	Singhpur
Low	Narsingh Dih
Low	Gopalpar
Low	Belghat
Low	Rajnauli
Low	Mohanpur
Low	Sigaura
Low	Bans Gagha
Low	Dandi Khas
Low	Tandwa Bahlim
Low	Haraiya Urf Mathura
Low	Katkoli
Low	Gharawal
Low	Rampur
Low	Kathha Khair Garha
Low	ARAI DIH
Low	Dumn
Low	Purnaha
Low	Sukrouli
Low	Ghosaon
Low	Bela
Low	Pipra Pathak
Low	Brahmadeva
Low	Kathaka
Low	Kanchanpur
Low	MAHARAJPUR BUZURG
Low	Tinduhani
Low	Muhiuddinpur
Low	Akauna Khurd
Low	Karanrai Jiukar
Low	Asapar
Low	Gangwal
Low	Tikwa Madho
Low	Bonrepar
Low	Baghar
Low	Mehdia (Gogho)
Low	Lahra Miran
Low	Itkari
Low	Hem Chaura
Low	Menseer
Low	Tikwa Darzi
Low	Gauwara
Low	Tikuliadar
Low	Sear Jot Bihari
Low	Sidhari
Low	Barhiari
Low	Birai Buzurg
Low	Dhunia Pura
Low	Kusaha
Low	Lohidandi Buzurg
Low	Shankarpur
Low	Bistuie
Low	Rahdauli
Low	Kakrahi
Low	Kauadil
Low	Timha
Low	Sopae
Low	Raghunathpur Dhakwa
Low	Mahedaiaon
Low	Birai Khurd
Low	Pursauli
Low	Lahara Jamal
Low	Lahidandi Khurd
Low	Chak Daud
Low	Alavalpur
Low	Karanpur
Low	Bhatandi Mannulal
Low	Tikwa Chatur
Low	Rajpur
Low	Amanabad
Low	Kusaldiha
Low	Searam Adhin Singh
Low	Bhunwanion
Low	Khajuri
Low	Katha Babu
Low	Tikwi Birsahi
Low	Bhatandi Padarathdas
Low	Biskarpur
Low	URIANPUR
Low	Bishunpura
Low	Majhagawan
Low	Bhupgarh
Low	Jogdespur
Low	Tijpur
Low	Dimusa
Low	Bahra Dandi
Low	Chhitauna
Low	Dhorae Par
Low	Bidhanpar
Low	Baghmauwa
Low	Chak Farid
Low	Bahadurpur Khurd
Low	Belkur
Low	Bilaspur
Low	Harpur
Low	Kotiya Bishuni
Low	Baikunthpur
Low	Katia Babu
Low	Bala Chak
Low	Bahadurpur Bujurg
Low	Madhopur
Low	Barai Purwa
Low	Jhanjwa
Low	Pursouli
Low	Nawadih Khurd
Low	Ram Gosae
Low	Math Bhatandi
Low	Sir Khurd
Low	Kapwa
Low	Sultanpur
Low	Parari
Low	Chorar Khas
Low	Bansipur Urf Shahpur
Low	Ban Purwa
Low	Bharaulia
Low	Bharauliya
Low	Utama
Low	Vishunpur Urf Shahpur
Low	Gajpur
Low	Belhi
Low	Jonipur
Low	BANKATI
Low	Shakardiha
Low	Dheku Nadh
Low	Matiyaria
Low	Chautra Patti
Low	Jamin Govraur
Low	Maur
Low	Chautra Tiwari
Low	Jagakol
Low	Maur
Low	Urwa
Low	Tikuli Banaras
Low	Sir Buzurg
Low	Murarpur
Low	Gunwan Dih
Low	Tighra
Low	Khajuri
Low	Govraur
Low	Nakaujha
Low	Kakrahi
Low	Neoro
Low	Balia
Low	Lakhua Pakar
Low	Chakkhan Jaheer
Low	Naithi
Low	Bilwa
Low	Parshadipur
Low	Harlalpura
Low	Ghunchiari
Low	Jhinkhini
Low	Dohiyak
Low	Shiurajpur
Low	Tari
Low	Musori
Low	Pipri
Low	Harauli
Low	Ikauna
Low	Turkvalia
Low	Kotia Patti
Low	Jamin Kaithi
Low	Parsia
Low	Onapar
Low	Kotia Kolahal
Low	Kurauli
Low	Kisunpur
Low	Patkhauli
Low	Kanjarpar
Low	Chachairam
Low	Samvapur
Low	Phulpur
Low	Benipur Urf Bishunpur
Low	Bhatadiha
Low	Mana
Low	Bhalwan
Low	Sarahapura
Low	Bramhasari
Low	Chaudia Masan
Low	Baghauli
Low	Jhajhawa
Low	Saraiya Belwari
Low	Kukraha
Low	Bansipur
Low	Jangal
Low	Mathia Musesa
Low	Dubauli
Low	Parsa Khurd
Low	Narayanpura Buzurg
Low	Chaknurvaph
Low	Kaithi Bujurg
Low	Parouli
Low	Gajpur
Low	Shankarpur
Low	MASAN PAKAR
Low	Pachauhan
Low	Dehra Tiker
Low	Marwatia
Low	Narayanpur Khurd
Low	Bhitari
Low	Purag
Low	Kalu Chak
Low	Sahaspar Khurd
Low	Patisa
Low	Belvatilakram
Low	Rampur
Low	Palhipar
Low	Bhalwan
Low	Sati
Low	Dhamachia
Low	Sahdodand
Low	Jagarnathpur
Low	Harkhora
Low	Bhaluan
Low	Barparva Babu
Low	Nagwan
Low	Parsa Buzurg
Low	Barpar
Low	Charbata
Low	Varla
Low	Trilokpur
Low	Basudiha
Low	Sahaspar
Low	Adhoripur
Low	Bhagta
Low	Keshwapar
Low	Gaur Khas
Low	Gambhirpur
Low	Dubripura
Low	Siyar
Low	Balua Bhawani Baksasingh
Low	Bhisiya Bujurg
Low	Majhganwa
Low	Salarpur
Low	Digurpura
Low	Mitanpur Khurd
Low	Umaria
Low	Birti
Low	Mitanpur Buzurg
Low	Jagdeeshpur
Low	Pipersandi
Low	Udepur
Low	Kohara
Low	Parsadewa
Low	Sisayal
Low	Patharha Babu
Low	Keshavapur
Low	PIPARDND
Low	Kuwa
Low	Thate Khas
Low	Math Durbasa
Low	Kuri
Low	Deokali
Low	Nagwa
Low	Bharasi
Low	Chandi
Low	Barha Buzurg
Low	Kalani Tandwa
Low	Lakuri Nisfi Babu
Low	Khasuha
Low	Mundera
Low	Dangipar
Low	Nakauri Khas
Low	Kurhari
Low	Chak Bhola
Low	Araon Jagdes
Low	Patkhauli
Low	Baidauli
Low	Bamhanpura
Low	Mathauli
Low	Anirudhpur
Low	Banspar
Low	Kaidaha Khurd
Low	Banionpar
Low	Mathanian
Low	Khankhar
Low	Math Parasram
Low	Bandhwa
Low	Chakraghodas
Low	Dandail
Low	Bhisia Khurd
Low	Singha
Low	Nagahara
Low	Chhapara
Low	Rajgarh
Low	Bhera Pakar
Low	Ranipur
Low	Barauli
Low	Aslabhar
Low	Ajamata
Low	Surha
Low	Kaidaha Buzurg
Low	Marchi
Low	Kastmitai Tiwari
Low	Marcha
Low	Bhainsahi Khurd
Low	Govindpur
Low	Tiar Khas
Low	Jiopar
Low	Garh
Low	Pakri Dube
Low	Bariar
Low	Jamin Bishunpura
Low	Chitauna
Low	Rohua
Low	Parpurwa
Low	Mahuja
Low	Kuei
Low	Tendua
Low	Bhawanigarh
Low	Alavalpur
Low	Baidauli
Low	Manikapar
Low	Lerwabari Buzurg
Low	Chetankak Domwar
Low	Bhatpar
Low	Manikapar
Low	Gajpur
Low	Mahopar
Low	Darihath
Low	Satora
Low	Katwa Udani
Low	Sati
Low	Belsari Buzurg
Low	Shambhupur
Low	Jagarnathpur
Low	Paresapar
Low	Basantpur
Low	Santhi
Low	Jhauwa Khurd
Low	Bhainsahi
Low	Newas
Low	Malan
Low	Sajiwan
Low	Kanta
Low	Misraulia
Low	Baranw
Low	Bhat Purwa
Low	Chawaria Khurd
Low	Tengri
Low	Lerwabari Khurd
Low	Ganeshpur
Low	rAMDIH
Low	Vijai Basaratpur
Low	Uncher
Low	DUMRI
Low	Bathwa Buzurg
Low	Ghipjokhar
Low	Majhili
Low	hARDATPUR
Low	Mallah Purwa
Low	Natwabar
Low	Ahirauli
Low	Chandi
Low	Mathia
Low	Shulkalpura
Low	Girdharpur Solanki
Low	Banjaria
Low	Lalmanpura
Low	Katka
Low	Harijanpur
Low	Jhajhwa
Low	Sahdewapar
Low	Jhauwa Kalan
Low	Rani Bhainsa
Low	Chauria Buzurg
Low	Chaukari
Low	Rani Bhainsa
Low	Sahdewapar
Low	Harijgnpur
Low	Jhajhwa
Low	Baikunthpur
Low	Ahirauli
Low	MATHIA
Low	Dharamshala
Low	Banjaria
Low	Yadav Pali
Low	Sikri Dih Buzurg
Low	Chauria Buzurg
Low	Harpur
Low	Launra
Low	Naraichpar
Low	Bhaiya Jot
Low	Kauwaram Khurd
Low	Girdharpur Dube
Low	Kanaicha
Low	Hariharpur
Low	Dhaunsa
Low	Bardiha
Low	Harpur
Low	RawatPar
Low	Lakhnaura
Low	Kusphara
Low	Pandepur (Jagdispur)
Low	Purwapar
Low	Besahni
Low	Ismailpur
Low	Girdharpur Chaube
Low	Bhita
Low	Koeran
Low	Kotia
Low	Bharaulia Karan
Low	Khujra
Low	Sikriganj
Low	Maraiya
Low	Purwa
Low	Paltupur
Low	Baswarigaon
Low	Gulriha
Low	DhanrinJot
Low	Beleari Purwa
Low	Purnoha
Low	Gaurijitpur
Low	Gopalpur
Low	Mundera
Low	Majhauwa
Low	Kasht Neara
Low	Harredan Khurd
Low	Patkhauli
Low	Piparpanti
Low	Kopwa
Low	Darhul Kamal Chak
Low	Gadaria Purwa
Low	Imli Dih Buzurg
Low	Dariha Buzurg
Low	Masidia
Low	Pali
Low	Thunhi Mahob Chak
Low	Deodanr (Gopalpur)
Low	Gajari
Low	Nimdanr
Low	Pandit Shukulpura
Low	Mahupar
Low	Reora Dih
Low	Karouta
Low	Harredanr Buzurg
Low	Leruapar
Low	Rasait
Low	Bharwaliya Buzurg
Low	Tengri
Low	Hata Buzurg
Low	Hata Khurd
Low	Balua
Low	Bela Khurd
Low	Imli Dih Khurd
Low	BELDARIPUR
Low	Bargaon Sharki
Low	Jadupur
Low	Telibhar(Bishunpura)
Low	Kanapar
Low	Sultani
Low	Tighra Khurd
Low	Keotan
Low	Lachhmipur
Low	Hargana
Low	Jadu Patti
Low	Neora
Low	Teonan
Low	Kudaria
Low	Lunian
Low	Gobraur
Low	Chuntaha
Low	Sahwapar
Low	Bela Buzurg
Low	Tighra Patwari
Low	Pakri
Low	Pitambarpur
Low	Bohabar
Low	Bhatpurwa
Low	Patti Bargaon Samogar
Low	Tendua
Low	Anrrauli
Low	Budhanpur Buzurg
Low	Dariha Khurd
Low	Bastupar
Low	Ahirauli Buzurg
Low	Sarar Majhgawan
Low	Kataia
Low	Lakhan Khurd
Low	Suaraha
Low	Keotan
Low	Patti Bargaon Saraunan
Low	Matha
Low	Gain Bela
Low	Mahelwar
Low	Pandepar
Low	Dhusuna
Low	Tulsipakar
Low	Kunaha
Low	Amwa
Low	Sai Khurd
Low	Bhiti
Low	Patkhauli
Low	Basawanpur
Low	Patraitha
Low	Ragghupur
Low	Khuruhuri Chhoti
Low	Narayanpur
Low	Baram Ka Than
Low	Sai Buzurg
Low	Baksauri
Low	Atkawali
Low	Pipraitha
Low	Tighra Rudarman
Low	Sugaha
Low	Bankati Khurd
Low	Ahuirauli Khurd
Low	Dhaski
Low	Nasirpur
Low	Lakhan Buzurg
Low	Harraiya
Low	Kandhla
Low	Barpalwa
Low	Bharthari
Low	Jamru
Low	Dhanaura Buzurg
Low	Singhpur
Low	Palahpur
Low	Bar Purwa
Low	Somahi
Low	Bankati Buzurg
Low	Mau Buzurg
Low	Potrutola
Low	Noukapura
Low	Panar Purwa arazi
Low	Kasht Triphala
Low	Sarauna
Low	Mathia
Low	Madhotola
Low	Saharia
Low	Dewarbir
Low	Kotia Amansingh
Low	Ultha Buzurg
Low	Baripur Jagarnathpur
Low	Sakharua
Low	Lalpur
Low	Siharwa
Low	Satahwa Chak
Low	Belwa Khurd
Low	Misraulia
Low	Bharoulia
Low	Dhanaura Khurd
Low	Sukrauli
Low	Misraulia
Low	Pachperia
Low	Soti
Low	Patkhauli Purwa
Low	Mau Khurd
Low	Ahir Purwa
Low	GajaiKol
Low	Bamaura(Bhamaura)
Low	Karwania Purwa
Low	Dhaska
Low	Gunraitola
Low	Ultha Khurd
Low	Kasht Sukhdeo Purwa
Low	Kalaura
Low	Pachisi
Low	Sirsia
Low	Pindh
Low	Jariahia
Low	Dhebra Buzurg
Low	Usuni
Low	Mahuja
Low	Bhiti Khurd
Low	Kotia
Low	Masi
Low	Amari
Low	Siswa (sinwa)
Low	Bahorwa
Low	Jamni Joa
Low	Keotantola
Low	Balua
Low	Deoria
Low	Neorl
Low	Tighra Tehra
Low	Daswantpur(Jaswantpur)
Low	Bairwa
Low	Narainapar
Low	Belparg
Low	Bishunpur
Low	Malkatola
Low	Malauli
Low	Gohlia
Low	Kalani
Low	Shaikh Purwa(Purwa Musalman)
Low	SAHTAUL
Low	Khamua Padam
Low	Bhatas
Low	Ranipur
Low	Maha Dih
Low	KANTA
Low	Ahirantola
Low	Belwa Buzurg
Low	Tiwaripur
Low	Madhapur
Low	Gurmhi
Low	Pindra
Low	Narainapur
Low	Gunwari
Low	Babhnauli
Low	Barihari
Low	Haraja
Low	Nadua Gajanpur
Low	Khajuria
Low	Mathia
Low	Soharwa
Low	Kauriram
Low	Kablaspur
Low	Loniatola
Low	Loharpur
Low	Kutia
Low	Bhitaha
Low	Dhakwa
Low	Bhakurha
Low	Basauli Buzurg
Low	Pipraha
Low	Bautha
Low	Mohan Bedauli
Low	Keotantola
Low	Baidauli
Low	Bhatauli Khurd
Low	Beldaripur
Low	Ekdanga
Low	BAIRIA
Low	Dhobauli Gaharwar
Low	Sonai Khurd
Low	BHAGWAN CHAK DOHARIA
Low	Dumn Raby
Low	Manjharla
Low	Sanro
Low	Hundri
Low	Bendwapar
Low	Gobrauri
Low	Dubauli
Low	Gursairi
Low	Sohgaura
Low	Sahasraon
Low	Domari
Low	Bairihwa
Low	Barigaon
Low	Majhgawan
Low	Bhitkhori
Low	Rautpar
Low	Barpurwa
Low	Belman
Low	Aktahia
Low	Shikargaoh
Low	Usrain
Low	Mathia
Low	Sahua
Low	Tikar
Low	Atrauli
Low	Kintubhar
Low	Parshadipur
Low	Malhanpar
Low	Baghaura
Low	Bhainsa
Low	Kaithauli
Low	Lahidandi
Low	Hundra
Low	Rataripura
Low	Sonai Buzurg
Low	Gauri Buzurg
Low	Khajahia
Low	Karwania
Low	Goplapur
Moderate	Pochia
Low	Chakia
Low	Kaithauli
Low	Chhedidandwa
Low	Koni Khurd
Low	Deorar
Low	Basauli Khurd
Low	Nokhaipura
Low	Ranapor
Low	Tighra
Low	Dumri
Low	Manjharia
Low	Pakardiha
Low	Diliaghat
Low	Gobraur
Low	Baghrain
Low	Bahidandi
Low	Shah Patti
Low	Masuria
Low	Bhaiyapura
Low	Saintar
Low	Bhaiyapura
Low	Koni Buzurg
Low	Dandwa Manohar
Low	Kasht Deor
Low	Jagdishpur
Low	Ekll
Low	Dhusi
Low	Barigaon
Low	Bhiti
Low	Raghunathpur
Low	Marautia
Low	Mahuapar
Low	Jayantipur
Low	Bar Purwa
Low	Jahaurabad
Low	Shaikh Bheora
Low	Bedauli Paltan Singh
Low	Kanwarpura
Low	Lalpur
Low	Ganeshpur
Moderate	Kukurbhukwd
Low	Phulhar Buzurg
Low	Gauri Khurd
Low	Gerua Parsaunan
Low	Dighaur
Low	Bijra Tal
Low	Banse
Low	Dishunpur Matiara
Low	Hariharpur
Low	Sujanpura
Low	Amwa
Low	Tikri Khurd
Low	Amarpur
Low	Kaparphorwa
Low	Chandpar
Low	Itaua
Low	Silhata
Low	Kasht Bhoj
Low	Naipura
Low	Barhyapar(Bhadar)
Low	Bharaulia
Low	Naipura
Low	Uska
Low	Asekhoo
Moderate	Mitthabel
Low	Dulahra
Moderate	Panrar
Low	Jari
Low	Mashapar
Low	Lachhmipur
Low	Mahuar Kol
Low	Donkha Chand
Low	Tikri Buzurg
Low	Phulhar Khurd
Moderate	Harpur
Moderate	Narendarpur
Low	Chandpur
Low	Deorar Baboo
Low	Lalpur
Low	Ratanpura Babu
Low	Bankata
Low	Bharkachha
Low	Khaorha Dewar
Low	Pinria
Low	Pandepura
Low	Kotsikra
Low	Balua Gopalpur
Low	Bijaura
Low	Ahirpurwa
Low	Chhatiari
Low	Hardani
Low	Sanwa
Low	Hariharpur
Low	Dubauli
Moderate	Mohanpur
Low	Chorbhari
Low	Tanwahia
Low	Diwa
Low	Nakaha
Low	Dumraila
Low	BARDIHA
High	Uttarka
Low	Ufrauli
Low	Mahdewa
Low	Majhari Purwa
Low	Chhitahri
Moderate	Nakwar Ghat
Low	Chaitra
Low	Baraban(Badain)
High	Barwa
Low	Lakaria
Low	Pharndia Buzurg
Low	Katharia
Low	Pakhanpur
Low	Nakeahian
Low	Gochharan
Low	Baitaba
Low	Bhilaha Pande
Low	Kharkhunta
Low	Nakwar
Moderate	Nibhi
Low	Danwa Chatur
Low	Amauli
Low	Baraitola
Low	Komalpura
Low	Barpar Ponde
Moderate	Karouni
Low	Kunarpar
Low	Budhaura
Low	Beldaripura
Low	Kutiya
Low	Darzi Purwa
Low	Matiara
Low	Teliabhar
Low	Baklaha
Moderate	Phailah
Low	Patkhauli
Moderate	Nouabari
Low	Sahridand
Low	Jigna Bhaon
Low	Baur Dih
Low	Pharandia Khurd
Low	Kishunpur
Low	Danwa Chatur
Moderate	Belahi
Low	Bishunpura
Low	Baijnatha
Low	Danri
Low	Bhaurahi
Low	Malhanpar Khurd
Low	Pachhimpura
Low	Gerua
Low	Phului
Low	Baraipar
Low	Katwar
Moderate	Pandeori
Moderate	Bairahi
Low	Maghipar
Low	Bhagour
High	Longiadih
Low	Gularia
Low	Budhaura
Low	Batahra
Moderate	Nakwar
Low	Danwan
Low	Bhaironpur
Moderate	Ghoth
Low	Balo Chak
Low	Kataharwa
Low	Jogia
Low	Math Biharidas
Low	Raghua Dih Buzurg
High	Lilkanth Sahi
Low	Sairon
Low	Roha
Moderate	Harilwa
Low	Kalyanpur
Low	Nonav
Low	Bhagne
Moderate	Kormaita
Moderate	Khutaha
Low	Dandi Rawat
Low	Hatwar
Low	Jairam Kol
Low	GOCHHWAL
Low	Jagdishpur
Low	Bhainsa Harihar
Low	Barohi
Low	Israuli
Low	Singra
Low	Kohatarup
Low	Dangipar
Moderate	Lachhmpur
High	Barahra
Low	Baraila Tal
Moderate	Bankatia
Low	Bharohia
Low	Parsia
Low	Musrad
Low	Nagwa
Low	Manjharia Khurd
Low	Jalti
Low	Barohri
Low	aunrarup
Low	Kasihar
Low	Kothaghurhu
High	Raghunandanpur
Moderate	Raghupatti
Low	Newas
Moderate	Keotantola
Low	Kandhauli(Kanhauli)
Low	Kewtan
Moderate	Lalapur
Low	BASDILA
Low	Pagar
Moderate	Piprapat
Low	Purniha
Low	Sakhuana
Low	Sonahna
Moderate	Kulran
Low	Raghua Dih Khurd
Low	SUKHNIA
Low	Dandwa Ramchandar
Low	Hardia
Low	Saraighat
Low	Parai Danr
Low	Dadaura
Low	Sarsopar
Low	Kuchaita
Moderate	Bangla
Moderate	Barwatola
Low	Arazi Mahuapar
High	Bodhi Chhapar
Low	Mahmoodpur
Low	Basuhi
Low	Kothaghurhu
Low	Gorsaira
Moderate	Ahirantola
Low	Bhatpar
Low	Mator
Moderate	Padri
Low	Chaubepura
High	Chainpur
High	Nunia
Low	Bastia
Moderate	Belwa
Moderate	Rampur
Low	Barahi Purwa(Bar Purwa)
Low	Situapur
Low	Loharpurwa
Low	Dihghat
Low	Dadoora
Low	Pinria
Moderate	Barampur
Low	Amraiya
Low	Pakarghat(Dhebri)
Low	Dughra
High	Duldulia
Low	Silhata Mundera
High	Bankata Bazar
Moderate	Kuiran
Low	Deorar Babu
Low	Sairon
Low	Paikauli
Low	Baidauli Baijnathsingh
Low	Darha Khurd
High	Sherpur Barahra
Low	Chandhar
High	Jagat Gobind
Low	Pasitola
Low	Bharwal
High	Chhota
Low	Got Ki jot
Low	Kandhauli
Low	Mahmudpur
Low	Bhuswal Khurd
Low	Pakri Damadar
Low	Majhauwa
High	Simri
Low	Mahuapar
Moderate	Shukul Jot
Low	Rashnapar
Moderate	Solabhartola
Low	Bheusa
Moderate	Amghat
Low	Tonrai
High	Balewa
Low	Etaura
Moderate	Sonbarsatala
Low	Mahansi
High	Karaundh
Low	Dhamaur
Low	Tongrl
Low	Bhatwali
Low	Semra
Moderate	Nauki Bazar
Low	Belhra
High	Narainpur
Low	Updhaulia
Low	Ghaisra
Low	Murdewa Chok
Low	Ina Dih
Low	Malaon
Low	Kharhari
Low	Bamhan Bhainsa
Low	Rajpur
Low	Khadiapar
Moderate	Baijudiha
Moderate	Bhotuha
Low	CHAK RAJAPUR
Low	Deoghata
Low	Kanail
Moderate	Bishunpura
Low	Bistauli Buzurg
Low	Katia
Moderate	Kol Pahia
Moderate	Nakahatola
Low	Karahi
Low	Karahi
Low	Bhitaha Kumwar
Moderate	Hathkhal
Low	Bistauli Khurd
Low	Bhainsa
Low	Karwania
Low	Dhanauji
Moderate	Piprahia
Low	Bhera Chak
Low	Bharohia
Low	Belipar
Low	Banaitha
Low	Bhatiari
Low	Bhuswal Buzurg
Low	Jigina Tiwari
Low	Ghasaria
Low	Gohipur
High	Bhatahi
Moderate	Kuiran
Low	Deokali Khurd
Low	RIKWA
Low	Gohli Basant
Low	Sonra
High	Belwa Alamdas
Low	Mathia
Low	Aunji
Moderate	Naukatola
Low	Rajwal
Moderate	Majhwa
High	Dharam Rai
Low	Karhal
High	Bhatahi Khurd
Low	Gobind Chak
Low	Bandua Chatur
Low	Jhinga Babu
Low	Paisa
Moderate	Parsia
Moderate	Natwa
Moderate	Ramnagar
Low	Katea
Low	Badra
Low	Gorra
Moderate	Naukatola
Moderate	Ghatull
Low	Ahiran
High	Sumahi
Low	Dhanaipur
High	Gushain
High	Bhatwa
Low	Kasehra
Low	Majhgawan
High	Hatwa
Low	Rajdhani
Low	Pipra
Moderate	Pirarahia
Low	Satahra Mohan
Low	Konan Sonbarsa
Low	Gopalpur
Moderate	Arah
Low	Ghorsari
Low	Bhasman
Low	Deokali Buzurg
Low	Chak Baid Purwa
Low	Bakuchi
Low	Kharauhan
Low	Biku Bhainsa
High	Khairatia
Moderate	Mathia
Low	Dhgnaipur
Low	Gopipur
Low	Panapar
Low	Karamdewa Buzurg
Moderate	Bhiswa
Low	Khanrha Deor
Low	Barhi
Moderate	Nilami
Low	Jaipalpur
Moderate	Balughata
Low	Beludjha
Low	Kharphara
Low	Bhuswa Buzurg
High	Rampur
Moderate	Tendua Khurd
Low	Gajari
High	Imlia
Low	Kaithwalian
Low	Karelabhari
Low	Bhitaha
Moderate	Katahriatola
High	Lohraulia
Low	Jigni Danr
Low	Karamdewa Khurd
Low	Bhiti
Low	Tengri
Moderate	Balghataghat
Moderate	Beni Jot
Low	Ghansahi
High	Bhanpur
Moderate	Dehra Dabar
Low	Bela
Low	Tenuha
Moderate	Hathkhal
Low	Kharphara
High	Uda Bhagat
Moderate	Shiva Pur
Low	Simrauna
Low	Sanwarupur
Low	Barhni
Low	Teurkhawan
High	Chakia
Low	Dhakrauli Dhubauli
Low	Thathaur
Low	Deonathpur
Moderate	Kharharwa
High	Bhatahi
Moderate	Mahual
High	Gushain
Low	Siar
Low	Kasimpur Jigni
Low	Atraura
Moderate	Karmajhatola
Low	Rupanari
High	Shankarpatti
High	Daria
Moderate	Pakwatola
Low	Naurdeor
Low	Barhawa
Low	Sarbasi
Low	Tulsi Pande
High	Barsatpur
High	Pachrulhra
Low	Daunrpar
High	Naktaha
Low	Unchgaon
Low	Aunrai
Low	Badara
Moderate	Barbasaha
Moderate	Bhaisahi Naresh
Low	Khiryahwa
Low	Charahla
Low	Unaula
High	Bharsandwa
Low	Balra
Low	Khairi
Low	Ainwan
Low	Jhunria
Low	Kuan Khurd
Low	Kuan Buzurg
Low	Banspar
Moderate	Ahirwati
Low	Chandlaha
High	Nathapatti
Moderate	Margia
High	Sumahi
Low	Sokahna
Moderate	Nauhar Sah
Low	Senwapar
Low	Khatalia
Low	Baraipar
Low	Jamauli Bujurg
High	Mahuabar
Low	Chakdah
Low	Garaina
Low	Gosampur
Low	Bahuripar
Low	Sisihwa
Low	Kalwari
Moderate	RESULAPUR JANGAL
Low	Benwa Tikar
Moderate	Naukatola
Moderate	Bahadurpur
Low	Kathiori
Low	Tama
Low	Piash
Low	Bheori Khargram
Moderate	Jakhnigaon
Low	Ekama
Moderate	Goraritola
Low	Deoriaza
Low	Chandauli Khurd
High	Pachrukhia
Moderate	Porsauni
Low	Ekma
Low	Raji
Low	Khainrati
Low	Koeripurwa
Low	ACHHEHWA
High	Patkhauli
Low	Mangalpur
Low	Aunrai
Low	Bahuripar Khurd
Low	Parsaun
Low	Baghaila
Low	Kaithauli
Moderate	Bhaisah
Moderate	Haphua Jiwan
Low	Deoara
Moderate	Ataria
Low	Bogeswaridevi Tanda
Low	Hardi Chak
Low	Jamauli Khurd
Low	Gidaha
Moderate	Haphua Chaturbhuj
Low	DEOKALI
Moderate	Kaurrtol
High	Bhulan Chhapra
Low	Bheori
Low	Bargadwa
Low	Katrar
Low	Chandauli Buzurg
Low	Lachhmanpur
High	Amarpur
High	Sumahi Khurd
Low	Kataicha Bindan
Low	Sonari Ramchandra
Low	Dubauli
Low	Digha
Low	Bilrahwa
High	Kastura
Low	Chautarwa
Low	Dhebra
Low	Aima
High	Mundera
Low	Shekhpura
Low	Sopara
Low	Kuin
High	Pitambarpur
Low	Chaka Nakdah
Low	Daria Dih
High	Pachrukhiatola
Low	lJolahbarl
Low	Bintolia
Moderate	Jagdishpur
Low	Pipra Bhairo
Moderate	Nainu Pahru
Moderate	Bahadurpur
Low	Mahuraiya
Low	Jagarnathpur
Moderate	Bishnathpur
Moderate	Salemgarh
Moderate	Miyan
Low	Chak Deiya
Low	Nagawan
Low	Chak
Low	Shalkhpurwa
Low	Suadda
Low	Dhauripar Parhya
Low	Mohnapur
Low	Thakaichpar
Low	Karjahi
Low	Dihapura
High	Pakariar
Moderate	Julaha
Low	Katrari
Moderate	Sukhdew Patti
High	Chaura
Moderate	Khakharwatola
Low	Charpan Khurd
Low	Harnahi
Low	Banaihta
High	Pharendaha
Low	Chak Bangla
Low	Ahamadpur
Low	Hata
Low	Panditpur
Low	Nawapar
Low	Supra
Low	Dubaria
Low	Murdewa
High	Chhattu Katea
Moderate	Solgarhi
Moderate	Rampur Bangra
Low	Neosa
Low	Bhainsahla
Low	Sonari Shankar
Low	Chakdahwa
Moderate	Taria Lachhiram
Low	Amdiha
Moderate	Jogidas Kuti
High	Bantel
Moderate	Kalthaulia
Low	Sannsi
High	Pakriar (Binwalia)
Low	Gondsaira
Low	Alapar
High	Chaura
Low	Pipra Manni
Low	Muria
Low	Natani
Low	Kolhat
Moderate	Lachhmipur
Moderate	Baghra
High	Srikishan Sahi
Low	Bhitaha
Low	Supri
Low	Charpan Buzurg
High	Tola Ramtawakal Sahi
Moderate	Jamsari
Moderate	Anirauli Dan
Moderate	Ram Dihal
Moderate	Saraia Khurd
Low	Gajar Jogais
Low	Rampur
Low	Khapria Bhar
Low	Satahwa
Low	Belhi
Low	Sangrampur
Low	Mahdeiya
Moderate	Harbanspatti
Low	Kusmaul
Moderate	Jamunia
Low	Jhakahi Baisan
Moderate	Naukatola
Low	Nakaitola
Low	Gopal Deoria
Low	Jhunria
Low	Barhara
High	Rampur
Low	Semeri
Moderate	Sukkika
High	Mathia
Low	Karpaiya
Low	Khajuri
Low	Raksa Babu
High	Lathaur
Low	Gahana
Low	Sahijana
Moderate	Pande
Low	Machauli
Low	Neosa
Moderate	Chhapra
Low	Gajar Bansman
Low	Chamrauti
Moderate	Taria Harkes
Low	Bhela Kharg
Low	Sohupar
Low	Dhaski Buzurg
High	Tarwanwan
Moderate	Khudra
Low	Bheosa
Moderate	Tinphiria
Moderate	Semra
Low	RAMPUR KHURD
Moderate	Gauri
Low	Pipra Ganga
Low	Jhakahi (Usmanpur)
Moderate	Sirampatti Mathia
High	Kumian
Low	Mohtan
Low	Sisai
Low	Bhaupur
Moderate	Jangol
Low	Deoria
Moderate	Siswa Buzurg
Low	Basawatola
Moderate	Dosoukdtha
High	Sonbarsa
Moderate	Amahia
Low	Pakri Mian
Low	Piprahia
Low	Nibia
Low	Moti Pakar
Low	Rakauli
Low	Gajarnarsingh
Low	Rehra
Moderate	Salemgarh
Moderate	Banjarwa
[truncated: 6,974 more rows]

## Sheet: epidedemo_Places
Epidemology Class	Place Name
Low	Belthar
Low	Ajaipura
Low	Narharipur
Low	Mukundwar
Low	Budhanpura
Low	Jhajwa
Low	Basukhia Bujurg
Low	Rajauli Bjurg
Low	Dumari
Low	Ojhavali
Low	Newada
Low	Pohila
Low	Narhi
Low	Kharesari
Low	Belpar
Low	Rajauli Khurd
Low	Bhiti
Low	Bhiti Dube
Low	Basawanpur
Low	Mahuliya Khurd
Low	Bhasauli
Low	Rampur Garhwa
Low	Anand Garh
Low	Koerari
Low	Sidhi Gaur
Low	Madarha
Low	Misrauli
Low	Derwa
Low	Koerar
Low	Saraya Chak
Low	Chatauli
Low	Gaighat
Low	Barhaya Dube
Low	Gaurpar
Low	Gadhwa
Low	Nibi Tila
Low	Gartholi
Low	Saradaha
Low	Saeya
Low	Nakata
Low	Maibhara
Low	Nawachpar
Low	Mahuliya Poyal
Low	Nibi Dubey
Low	Kokata
Low	Kokta
Low	Bardiha
Low	Sansarpar
Low	Sidhuapar
Low	Bahadurabad
Low	Mangalpur
Low	Mahuapar
Low	Kohnra Bhorwar
Low	Marawat
Low	Lakhnaura
Low	Dubauli
Low	Bishunpura
Low	Bishunpura
Low	Sidhuapar
Low	Saradah
Low	Khajuri Gosain
Low	Khajuri Pandey
Low	Nitwar
Low	Nibiseni
Low	Lakhnauri
Low	Berahua
Low	Bhatanipar Bujurg
Low	Ramjiwanpura
Low	Ramgarh
Low	Patna
Low	Kuraon
Low	Lacchmiipur
Low	Jhumila
Low	Chhapia Umraw
Low	Makarndpur
Low	Baraipar
Low	Distaulia
Low	Ratla
Low	Shukul Puri
Low	Pirahni
Low	Durgapur
Low	Baridiha
Low	Pushkar Bujurg
Low	Tiha Muhammadpur
Low	Parasia Tiwari
Low	Bhatanipur Khurd
Low	Nadua
Low	Devakali
Low	Hinguhar
Low	Bhatnipar Khurd
Low	Dhanauli
Low	Turkwalia
Low	Marwatia
Low	Baghuaiya
Low	Purapar
Low	Barhaj
Low	Bhadia Tilur
Low	Rampur Baghaura
Low	Dadra Dasht Mathanj
Low	Ahirauli
Low	Dhanauli
Low	Barahata
Low	Madaria
Low	Amhakpur
Low	Dhanaw
Low	Pushkar Khurd
Low	Khohia
Low	Narahan
Low	Duramha
Low	Markari
Low	Sarkara
Low	Sakat Pura
Low	Dhudhuri
Low	Pipardari
Low	Dadra
Low	Barpar
Low	Mohammadpur
Low	Pirahani
Low	Maharajang
Low	Bimuti
Low	Rahua
Low	Kundwa Bari
Low	Pakauli Aman Chak
Low	Mundera
Low	Mathihani
Low	Ramanbari
Low	Babhnauli
Low	Khairpar
Low	Dhobauli
Low	Pharsar
Low	Amauli
Low	Pharsand
Low	Rajahata
Low	Atauli
Low	Chaubauli
Low	Asorgaht
Low	Kalhipar
Low	Parasia
Low	Bharroh
Low	Mehra
Low	Kusbhauna
Low	Saunkhor
Low	Lachhmipur
Low	Shlupur
Low	Chhitauna
Low	Sisawa
Low	Bheri Dih
Low	Manjhariya
Low	Besahani
Low	Sahruli
Low	Mundera
Low	Lakhanapar
Low	Marchipar Khurd
Low	Turkwalia
Low	Bhiti Bal
Low	Belawa
Low	Padmalpar
Low	Parari
Low	Sakra Khor
Low	Banjarha
Low	Sahrauli
Low	Udaipur
Low	Bharwali
Low	Nuawa
Low	Chhapia
Low	Ramamau
Low	Patkhauli
Low	Chitthepar
Low	Paraini
Low	Belsari
Low	Bhatpar
Low	Karaundi
Low	Jamin Shukul
Low	Kolhuwa
Low	Marachipar Bujurg
Low	Beisara
Low	Bevari
Low	Manipur
Low	Bahpur
Low	Bhat Chak
Low	Surdapar Raja
Low	Shanichara
Low	Mau Buzurg
Low	Bhiti
Low	Murlipur
Low	Mehadraw
Low	Deep Garh
Low	Mahania
Low	Koili Khal
Low	Akbarabad
Low	Kolhua
Low	Konrar
Low	Saraiya
Low	Tara
Low	Nakati
Low	Parauli
Low	Bari Tarya
Low	Surdapar Shukl
Low	Gan Bazar
Low	Korar Nil Kanth
Low	Kast Subans Dubey
Low	Dawanadih
Low	Bhiti
Low	Panditpur
Low	Newada
Low	Chainpura
Low	Bankata
Low	Khakhaijkhor
Low	Sakharwa Khurd
Low	Mahatopar
Low	Majhovalia
Low	Chak Bulaki
Low	Chikanian
Low	Madpur
Low	Baghagara
Low	Rudauli
Low	Bhat Purwa
Low	Katya
Low	Bhar Purwa
Low	Majhauliya Khas
Low	Jagdispur
Low	Jivchhin
Low	Ramkola
Low	Lugarapar
Low	Kauadil
Low	Sohrabir
Low	Chaukari
Low	Suaraj Khurd
Low	Palhnai
Low	Gahiraghat
Low	Phattepur
Low	Mamkhor
Low	Bisara
Low	Semari
Low	Mishrauli
Low	Semara Bujurg
Low	Bairia
Low	Gopalpur Kohna
Low	Ghosi
Low	Sonsatha
Low	Bhiti
Low	Dewaipipar
Low	Korari
Low	Suaraj Bujurg
Low	Chiraiyadani
Low	Kalyanpur
Low	Bhadaura
Low	Atraura
Low	Satora
Low	Bhaisahat
Low	Sakharua Bujurg
Low	Kohana Gopalpur
Low	Loharpur
Low	Baraipar
Low	Fakirpura
Low	Rakauli
Low	Misrauli
Low	Mishrauli
Low	Barhara
Low	Barwal Shankarparshad
Low	Tiragaon Khurd
Low	Kauria
Low	Purania/Arjunpur
Low	Tiragaon
Low	Ranipur
Low	Baraila
Low	Barwal Ishriparshod
Low	Nauli
Low	Parsia Nispi Raja
Low	Barawal Digar
Low	Patra
Low	Baraipar
Low	Jharakata
Low	Lunia Purwa
Low	Pojupar
Low	Shanichara Patti Babu
Low	Manipur
Low	Gorasari
Low	Jugesra
Low	Zamin Lohrapur
Low	Bijuliadand
Low	Barago
Low	Tikaria
Low	Bairiyadih
Low	Pandepurtola
Low	Nevasa
Low	Dheorparmus.
Low	Majhaura
Low	Sahdauli
Low	Tikri
Low	Belana Par
Low	Bahasua
Low	Ranipur
Low	Dubauli
Low	Chimcha
Low	Karokand(Baranagar)
Low	Gopalpur
Low	Ghora Lotan
Low	Sarya
Low	Brrah
Low	Gaurpar
Low	Devakali
Low	Utasiya
Low	Mahuran
Low	Hatabuzarg
Low	Unauli
Low	Pura Malahan
Low	Rampur Pande
Low	Avrakol
Low	Dubejot
Low	Loharapar
Low	Rampur Garari
Low	Karnauti
Low	Bhikhabhar Buzurg
Low	Khadra
Low	Samadhi
Low	Singhala
Low	Belnapar
Low	Chaura
Low	Shiurampur
Low	Bhikhabhar Bujurg
Low	Khirkita Digar
Low	Jalpahia
Low	Hatwa
Low	Sarahra
Low	Tariapar
Low	Gajubri
Low	Belapar
Low	Mathia
Low	Reman
Low	Abros
Low	Sahderwa
Low	Aswandpar
Low	Sarsara Buzurg
Low	Gangupat
Low	Bhusawal
Low	Durui
Low	Bhalwani
Low	Ratanpur
Low	Bhitaha
Low	Pandauli
Low	Kahla
Low	Kohri Buzurg
Low	Chhapra
Low	Kathwalia
Low	Malauli
Low	Sarsara Khurd
Low	Khirkita Dube
Low	Chirauwa
Low	Mungwar
Low	Chaunri
Low	Ahala
Low	Jamdara Plndarhi
Low	Kakarhi
Low	Khopapar
Low	Rampur
Low	Banwarpar
Low	Hariharpur
Low	Kohri Khurd
Low	Bhaisaon
Low	Rampur Baghaura
Low	Sardaha
Low	Belpar Pathak
Low	Ranidiha
Low	Baghi
Low	Naha
Low	Baraipur Urf Parauli
Low	Kansasur
Low	Gopalpur
Low	Chandauli
Low	Pakri
Low	Reaon
Low	Ahiraull
Low	Misrauli
Low	Rawatpar
Low	Imilihwa
Low	Semra
Low	Beladar
Low	Khutbhar
Low	Dewaribari
Low	Bhawajitpur
Low	Pandepur
Low	Alavlpur
Low	Dhanrajpur
Low	Dighwa Buzurg
Low	Keshokol
Low	Pokhari Gon
Low	Ganjhara
Low	Bandrahi
Low	Parsa Urf Aglagawa
Low	Sihaeejpur
Low	Lamatia
Low	Paratapipur
Low	Baraipar
Low	Misrauli
Low	Daidiha
Low	Patharha Misra
Low	Ahirauli
Low	Bhirwa
Low	Kast Mishrauli
Low	Palhwapur
Low	Tilsar
Low	Kasht Misrauli
Low	Ligni Khurd
Low	Sati
Low	Jigni Buzurg (Bangaon)
Low	Gerwakhor
Low	Dahrauli Gazan
Low	Misrhrauli
Low	Atapar
Low	Tejwapar
Low	Chhitauna
Low	Sisai
Low	Kalani
Low	Rasulpur Misra
Low	Basantpur
Low	Kahra Khurd
Low	BIjai (Mirpjur)
Low	Dhanrajepur
Low	Avasthi
Low	Ramnagar
Low	Kotia Nayar
Low	Alipur
Low	Gaya Ghat
Low	Bharauli
Low	Dandwa
Low	Dihulpar
Low	Raghunathpur
Low	Barparya Kaji
Low	Rajupur
Low	Kohara Bujurg
Low	Khaliya
Low	Beili Kund
Low	Parsia Nisfi Shukul
Low	Kharagpatti
Low	Nakauri
Low	Basahi
Low	Nargara Siva Datta Singh
Low	Samhutapur
Low	Ujjarpar
Low	Kast Bhawani Datt
Low	Gherya
Low	Akolha
Low	Marhiawa
Low	Ram Lakhan
Low	Patkhauli
Low	Katya
Low	Dhaka War Chak
Low	Unchagaon
Low	Munderi
Low	Bhabhya
Low	Nasirpur
Low	Jainpur
Low	Bhulan Chak
Low	Majgawan
Low	Patauha
Low	Parainia
Low	Lachchhi Chak
Low	Chandpar
Low	Damarpur/ Masha
Low	Parsia Nisfi Rawat
Low	Pichhaura
Low	Tiwaripur
Low	Bishunpur Raja
Low	Dilmanpur
Low	Paharpur
Low	Dudhawa
Low	Chareria
Low	Sonayeecha
Low	Inayat Chak
Low	Bhawanianpur
Low	Makarha
Low	Barhia Khurd
Low	Tikari
Low	Asthaula
Low	Samadpur
Low	Barhia Khurd
Low	Raepur
Low	Karwal
Low	Jitwarpur
Low	Doodapar
Low	Parasi
Low	Saram
Low	Math Ajudhio
Low	Arazi Mundiari
Low	Narayanpur
Low	Lagunahi
Low	Bila Berbhan
Low	Rapatpur
Low	Nagwa Bhagwan
Low	Tarkhop
Low	Purwa
Low	Lona Nagar
Low	Birti
Low	Bagha Kund
Low	Nagwa Pem
Low	Murarpur
Low	MALUN
Low	Parhati
Low	Chak Saraiya
Low	Dharsi
Low	Tikapur
Low	Dumri
Low	Chautara Babu
Low	Bulaki Chak
Low	Kukurha
Low	Bankat
Low	Bhataura
Low	Dhuriadih
Low	Paharpur
Low	Ahirauli
Low	Ranipar
Low	Pimgarh(Itauwa)
Low	Senuapar
Low	Manjharia Taluk Dhyanpur
Low	Dhabia
Low	Allahyarpur
Low	Kusmauli
Low	Khandra
Low	Meerpur
Low	Jharna
Low	Parwarpar
Low	Malpur
Low	Pakar Parwa
Low	Jhae
Low	Chilua
Low	Dakahi
Low	Narre Buzurg
Low	Barhia Buzurg
Low	Bheri
Low	Dudh Kunda
Low	Baupar
Low	Domaria
Low	Chak Khajir Khijir
Low	Manjharia
Low	Beili Khurd
Low	Ratanpura
Low	Gobrayeea
Low	Fatehpur
Low	Jagdispur
Low	Pandepar
Low	Harpur
Low	Lakhayee Deeh Khurd
Low	Mubaridpur
Low	SASNAN
Low	Math Kesho
Low	Mathdharmsen
Low	Shukulpur
Low	Tandwa
Low	Marar
Low	Rajgarh
Low	Babhnauli
Low	Chhitauni Bujurg
Low	Kasht Kashi Naik
Low	Gosaepur
Low	Deokali
Low	Lakhnapar
Low	Tiwaripur
Low	Dewapar
Low	Naraudan
Low	Goura
Low	Bath Khurd
Low	Sakari
Low	Hamidpur
Low	Keradih
Low	Chhitauni Khurd
Low	Jadwapur
Low	Dhaurahra
Low	Dayalpur
Low	Jaiti
Low	Chak Mali
Low	Sohnag
Low	Pipari Khurd
Low	Bhainsaha Buzurg
Low	Saneha
Low	Mukarimpur
Low	Akolahi
Low	Kusmaura Buzurg
Low	Narre Buzurg
Low	Shahpur
Low	Marha
Low	Barhajpur
Low	Mirari
Low	Mahulia
Low	Chhitauni Bhim
Low	Saharua
Low	Siswa Babu
Low	Kundahi
Low	Bijio
Low	Lakhayee Deeh Buzurg
Low	Ranjitgarh
Low	Bandwari
Low	Soukhor Khurd
Low	Lalchak
Low	Narre Khurd
Low	Mohan Chak
Low	Pachperwa
Low	Bath Buzurg
Low	Rukunpur
Low	Bhawanianpur
Low	Bharwaliya
Low	Sarraiya
Low	Akauna Bujurg
Low	Suarha
Low	Deorajpar
Low	Gaur Ganj
Low	Barpar Mafi
Low	Rauza Dargah
Low	MAHARAJPUR KHURD
Low	Ganga Chak
Low	Hatwa
Low	Rasulpur Babu
Low	Bhrsi Khurd
Low	Soukhor Bujurg
Low	Ladshmipur
Low	Hariharsir Buzurg
Low	Belwa Dari
Low	Chakrupaia
Low	Arazi Hariharsir Buzurg
Low	Pachma
Low	Asapar
Low	Gobindapur
Low	Khabhra
Low	Marautia
Low	Harhabhar
Low	Bharsi Buzurg
Low	Deorajpur Khurd
Low	Rampur Santha
Low	Hatwa (Gagha)
Low	Dehari Bhar
Low	Nagwan
Low	Bankot
Low	Chaparhat
Low	Guvari
Low	Kharagpur
Low	Rohari
Low	Newada
Low	Thatouli
Low	Godhana
Low	Omri Majhario
Low	Mahnapar
Low	Singhpur
Low	Narsingh Dih
Low	Gopalpar
Low	Belghat
Low	Rajnauli
Low	Mohanpur
Low	Sigaura
Low	Bans Gagha
Low	Dandi Khas
Low	Tandwa Bahlim
Low	Haraiya Urf Mathura
Low	Katkoli
Low	Gharawal
Low	Rampur
Low	Kathha Khair Garha
Low	ARAI DIH
Low	Dumn
Low	Purnaha
Low	Sukrouli
Low	Ghosaon
Low	Bela
Low	Pipra Pathak
Low	Brahmadeva
Low	Kathaka
Low	Kanchanpur
Low	MAHARAJPUR BUZURG
Low	Tinduhani
Low	Muhiuddinpur
Low	Akauna Khurd
Low	Karanrai Jiukar
Low	Asapar
Low	Gangwal
Low	Tikwa Madho
Low	Bonrepar
Low	Baghar
Low	Mehdia (Gogho)
Low	Lahra Miran
Low	Itkari
Low	Hem Chaura
Low	Menseer
Low	Tikwa Darzi
Low	Gauwara
Low	Tikuliadar
Low	Sear Jot Bihari
Low	Sidhari
Low	Barhiari
Low	Birai Buzurg
Low	Dhunia Pura
Low	Kusaha
Low	Lohidandi Buzurg
Low	Shankarpur
Low	Bistuie
Low	Rahdauli
Low	Kakrahi
Low	Kauadil
Low	Timha
Low	Sopae
Low	Raghunathpur Dhakwa
Low	Mahedaiaon
Low	Birai Khurd
Low	Pursauli
Low	Lahara Jamal
Low	Lahidandi Khurd
Low	Chak Daud
Low	Alavalpur
Low	Karanpur
Low	Bhatandi Mannulal
Low	Tikwa Chatur
Low	Rajpur
Low	Amanabad
Low	Kusaldiha
Low	Searam Adhin Singh
Low	Bhunwanion
Low	Khajuri
Low	Katha Babu
Low	Tikwi Birsahi
Low	Bhatandi Padarathdas
Low	Biskarpur
Low	URIANPUR
Low	Bishunpura
Low	Majhagawan
Low	Bhupgarh
Low	Jogdespur
Low	Tijpur
Low	Dimusa
Low	Bahra Dandi
Low	Chhitauna
Low	Dhorae Par
Low	Bidhanpar
Low	Baghmauwa
Low	Chak Farid
Low	Bahadurpur Khurd
Low	Belkur
Low	Bilaspur
Low	Harpur
Low	Kotiya Bishuni
Low	Baikunthpur
Low	Katia Babu
Low	Bala Chak
Low	Bahadurpur Bujurg
Low	Madhopur
Low	Barai Purwa
Low	Jhanjwa
Low	Pursouli
Low	Nawadih Khurd
Low	Ram Gosae
Low	Math Bhatandi
Low	Sir Khurd
Low	Kapwa
Low	Sultanpur
Low	Parari
Low	Chorar Khas
Low	Bansipur Urf Shahpur
Low	Ban Purwa
Low	Bharaulia
Low	Bharauliya
Low	Utama
Low	Vishunpur Urf Shahpur
Low	Gajpur
Low	Belhi
Low	Jonipur
Low	BANKATI
Low	Shakardiha
Low	Dheku Nadh
Low	Matiyaria
Low	Chautra Patti
Low	Jamin Govraur
Low	Maur
Low	Chautra Tiwari
Low	Jagakol
Low	Maur
Low	Urwa
Low	Tikuli Banaras
Low	Sir Buzurg
Low	Murarpur
Low	Gunwan Dih
Low	Tighra
Low	Khajuri
Low	Govraur
Low	Nakaujha
Low	Kakrahi
Low	Neoro
Low	Balia
Low	Lakhua Pakar
Low	Chakkhan Jaheer
Low	Naithi
Low	Bilwa
Low	Parshadipur
Low	Harlalpura
Low	Ghunchiari
Low	Jhinkhini
Low	Dohiyak
Low	Shiurajpur
Low	Tari
Low	Musori
Low	Pipri
Low	Harauli
Low	Ikauna
Low	Turkvalia
Low	Kotia Patti
Low	Jamin Kaithi
Low	Parsia
Low	Onapar
Low	Kotia Kolahal
Low	Kurauli
Low	Kisunpur
Low	Patkhauli
Low	Kanjarpar
Low	Chachairam
Low	Samvapur
Low	Phulpur
Low	Benipur Urf Bishunpur
Low	Bhatadiha
Low	Mana
Low	Bhalwan
Low	Sarahapura
Low	Bramhasari
Low	Chaudia Masan
Low	Baghauli
Low	Jhajhawa
Low	Saraiya Belwari
Low	Kukraha
Low	Bansipur
Low	Jangal
Low	Mathia Musesa
Low	Dubauli
Low	Parsa Khurd
Low	Narayanpura Buzurg
Low	Chaknurvaph
Low	Kaithi Bujurg
Low	Parouli
Low	Gajpur
Low	Shankarpur
Low	MASAN PAKAR
Low	Pachauhan
Low	Dehra Tiker
Low	Marwatia
Low	Narayanpur Khurd
Low	Bhitari
Low	Purag
Low	Kalu Chak
Low	Sahaspar Khurd
Low	Patisa
Low	Belvatilakram
Low	Rampur
Low	Palhipar
Low	Bhalwan
Low	Sati
Low	Dhamachia
Low	Sahdodand
Low	Jagarnathpur
Low	Harkhora
Low	Bhaluan
Low	Barparva Babu
Low	Nagwan
Low	Parsa Buzurg
Low	Barpar
Low	Varla
Low	Trilokpur
Low	Basudiha
Low	Sahaspar
Low	Adhoripur
Low	Bhagta
Low	Keshwapar
Low	Gaur Khas
Low	Gambhirpur
Low	Dubripura
Low	Siyar
Low	Balua Bhawani Baksasingh
Low	Bhisiya Bujurg
Low	Majhganwa
Low	Salarpur
Low	Digurpura
Low	Mitanpur Khurd
Low	Umaria
Low	Birti
Low	Mitanpur Buzurg
Low	Jagdeeshpur
Low	Pipersandi
Low	Udepur
Low	Kohara
Low	Parsadewa
Low	Sisayal
Low	Patharha Babu
Low	Keshavapur
Low	PIPARDND
Low	Kuwa
Low	Thate Khas
Low	Math Durbasa
Low	Kuri
Low	Deokali
Low	Nagwa
Low	Bharasi
Low	Chandi
Low	Barha Buzurg
Low	Kalani Tandwa
Low	Lakuri Nisfi Babu
Low	Khasuha
Low	Mundera
Low	Dangipar
Low	Nakauri Khas
Low	Kurhari
Low	Chak Bhola
Low	Araon Jagdes
Low	Patkhauli
Low	Baidauli
Low	Bamhanpura
Low	Mathauli
Low	Anirudhpur
Low	Banspar
Low	Kaidaha Khurd
Low	Banionpar
Low	Mathanian
Low	Khankhar
Low	Math Parasram
Low	Bandhwa
Low	Chakraghodas
Low	Dandail
Low	Bhisia Khurd
Low	Singha
Low	Nagahara
Low	Chhapara
Low	Rajgarh
Low	Bhera Pakar
Low	Ranipur
Low	Barauli
Low	Aslabhar
Low	Ajamata
Low	Surha
Low	Kaidaha Buzurg
Low	Marchi
Low	Kastmitai Tiwari
Low	Marcha
Low	Bhainsahi Khurd
Low	Govindpur
Low	Tiar Khas
Low	Ganeshpur
Low	Jiopar
Low	Garh
Low	Pakri Dube
Low	Bariar
Low	Jamin Bishunpura
Low	Chitauna
Low	Rohua
Low	Parpurwa
Low	Mahuja
Low	Kuei
Low	Tendua
Low	Bhawanigarh
Low	Alavalpur
Low	Baidauli
Low	Manikapar
Low	Lerwabari Buzurg
Low	Chetankak Domwar
Low	Bhatpar
Low	Manikapar
Low	Gajpur
Low	Mahopar
Low	Darihath
Low	Rampur
Low	Satora
Low	Katwa Udani
Low	Sati
Low	Belsari Buzurg
Low	Shambhupur
Low	Jagarnathpur
Low	Paresapar
Low	Basantpur
Low	Santhi
Low	Jhauwa Khurd
Low	Bhainsahi
Low	Newas
Low	Malan
Low	Sajiwan
Low	Kanta
Low	Misraulia
Low	Baranw
Low	Bhat Purwa
Low	Chawaria Khurd
Low	Tengri
Low	Lerwabari Khurd
Low	Ganeshpur
Low	rAMDIH
Low	Vijai Basaratpur
Low	Uncher
Low	DUMRI
Low	Bathwa Buzurg
Low	Ghipjokhar
Low	Majhili
Low	hARDATPUR
Low	Natwabar
Low	Ahirauli
Low	Chandi
Low	Mathia
Low	Shulkalpura
Low	Girdharpur Solanki
Low	Banjaria
Low	Lalmanpura
Low	Katka
Low	Harijanpur
Low	Jhajhwa
Low	Sahdewapar
Low	Jhauwa Kalan
Low	Rani Bhainsa
Low	Chauria Buzurg
Low	Chaukari
Low	Rani Bhainsa
Low	Sahdewapar
Low	Harijgnpur
Low	Jhajhwa
Low	Baikunthpur
Low	Ahirauli
Low	MATHIA
Low	Dharamshala
Low	Banjaria
Low	Yadav Pali
Low	Sikri Dih Buzurg
Low	Chauria Buzurg
Low	Harpur
Low	Launra
Low	Naraichpar
Low	Bhaiya Jot
Low	Kauwaram Khurd
Low	Girdharpur Dube
Low	Kanaicha
Low	Hariharpur
Low	Dhaunsa
Low	Bardiha
Low	Harpur
Low	RawatPar
Low	Lakhnaura
Low	Kusphara
Low	Pandepur (Jagdispur)
Low	Purwapar
Low	Besahni
Low	Ismailpur
Low	Girdharpur Chaube
Low	Bhita
Low	Koeran
Low	Kotia
Low	Bharaulia Karan
Low	Khujra
Low	Sikriganj
Low	Maraiya
Low	Purwa
Low	Paltupur
Low	Baswarigaon
Low	Gaighat
Low	Gulriha
Low	DhanrinJot
Low	Beleari Purwa
Low	Purnoha
Low	Gaurijitpur
Low	Gopalpur
Low	Mundera
Low	Majhauwa
Low	Kasht Neara
Low	Harredan Khurd
Low	Patkhauli
Low	Piparpanti
Low	Kopwa
Low	Darhul Kamal Chak
Low	Gadaria Purwa
Low	Imli Dih Buzurg
Low	Dariha Buzurg
Low	Masidia
Low	Pali
Low	Thunhi Mahob Chak
Low	Deodanr (Gopalpur)
Low	Gajari
Low	Nimdanr
Low	Pandit Shukulpura
Low	Mahupar
Low	Reora Dih
Low	Karouta
Low	Harredanr Buzurg
Low	Leruapar
Low	Rasait
Low	Bharwaliya Buzurg
Low	Tengri
Low	Hata Buzurg
Low	Hata Khurd
Low	Balua
Low	Bela Khurd
Low	Imli Dih Khurd
Low	BELDARIPUR
Low	Bargaon Sharki
Low	Jadupur
Low	Telibhar(Bishunpura)
Low	Kanapar
Low	Sultani
Low	Tighra Khurd
Low	Keotan
Low	Lachhmipur
Low	Hargana
Low	Jadu Patti
Low	Neora
Low	Teonan
Low	Kudaria
Low	Lunian
Low	Gobraur
Low	Chuntaha
Low	Sahwapar
Low	Bela Buzurg
Low	Tighra Patwari
Low	Pakri
Low	Pitambarpur
Low	Bohabar
Low	Bhatpurwa
Low	Patti Bargaon Samogar
Low	Tendua
Low	Anrrauli
Low	Budhanpur Buzurg
Low	Dariha Khurd
Low	Bastupar
Low	Ahirauli Buzurg
Low	Sarar Majhgawan
Low	Kataia
Low	Lakhan Khurd
Low	Suaraha
Low	Keotan
Low	Patti Bargaon Saraunan
Low	Matha
Low	Gain Bela
Low	Mahelwar
Low	Pandepar
Low	Dhusuna
Low	Tulsipakar
Low	Kunaha
Low	Amwa
Low	Sai Khurd
Low	Bhiti
Low	Patkhauli
Low	Basawanpur
Low	Patraitha
Low	Ragghupur
Low	Khuruhuri Chhoti
Low	Narayanpur
Low	Baram Ka Than
Low	Sai Buzurg
Low	Baksauri
Low	Atkawali
Low	Pipraitha
Low	Tighra Rudarman
Low	Sugaha
Low	Bankati Khurd
Low	Ahuirauli Khurd
Low	Dhaski
Low	Nasirpur
Low	Lakhan Buzurg
Low	Harraiya
Low	Kandhla
Low	Barpalwa
Low	Bharthari
Low	Jamru
Low	Dhanaura Buzurg
Low	Singhpur
Low	Palahpur
Low	Bar Purwa
Low	Somahi
Low	Bankati Buzurg
Low	Mau Buzurg
Low	Potrutola
Low	Noukapura
Low	Panar Purwa arazi
Low	Kasht Triphala
Low	Sarauna
Low	Mathia
Low	Madhotola
Low	Saharia
Low	Dewarbir
Low	Kotia Amansingh
Low	Ultha Buzurg
Low	Baripur Jagarnathpur
Low	Sakharua
Low	Lalpur
Low	Siharwa
Low	Satahwa Chak
Low	Belwa Khurd
Low	Misraulia
Low	Bharoulia
Low	Dhanaura Khurd
Low	Sukrauli
Low	Misraulia
Low	Pachperia
Low	Soti
Low	Patkhauli Purwa
Low	Mau Khurd
Low	Ahir Purwa
Low	GajaiKol
Low	Bamaura(Bhamaura)
Low	Karwania Purwa
Low	Dhaska
Low	Gunraitola
Low	Ultha Khurd
Low	Kasht Sukhdeo Purwa
Low	Kalaura
Low	Pachisi
Low	Sirsia
Low	Pindh
Low	Jariahia
Low	Dhebra Buzurg
Low	Usuni
Low	Mahuja
Low	Bhiti Khurd
Low	Kotia
Low	Masi
Low	Amari
Low	Siswa (sinwa)
Low	Bahorwa
Low	Jamni Joa
Low	Keotantola
Low	Balua
Low	Deoria
Low	Neorl
Low	Tighra Tehra
Low	Daswantpur(Jaswantpur)
Low	Bairwa
Low	Narainapar
Low	Belparg
Low	Bishunpur
Low	Malkatola
Low	Malauli
Low	Gohlia
Low	Kalani
Low	Shaikh Purwa(Purwa Musalman)
Low	SAHTAUL
Low	Khamua Padam
Low	Bhatas
Low	Ranipur
Low	Maha Dih
Low	KANTA
Low	Ahirantola
Low	Belwa Buzurg
Low	Tiwaripur
Low	Madhapur
Low	Gurmhi
Low	Pindra
Low	Narainapur
Low	Gunwari
Low	Babhnauli
Low	Barihari
Low	Haraja
Low	Nadua Gajanpur
Low	Khajuria
Low	Mathia
Low	Soharwa
Low	Kauriram
Low	Kablaspur
Low	Loniatola
Low	Loharpur
Low	Kutia
Low	Bhitaha
Low	Dhakwa
Low	Bhakurha
Low	Basauli Buzurg
Low	Pipraha
Low	Bautha
Low	Mohan Bedauli
Low	Keotantola
Low	Baidauli
Low	Bhatauli Khurd
Low	Beldaripur
Low	Ekdanga
Low	BAIRIA
Low	Dhobauli Gaharwar
Low	Sonai Khurd
Low	BHAGWAN CHAK DOHARIA
Low	Dumn Raby
Low	Manjharla
Low	Sanro
Low	Hundri
Low	Bendwapar
Low	Gobrauri
Low	Dubauli
Low	Gursairi
Low	Sohgaura
Low	Sahasraon
Low	Domari
Low	Bairihwa
Low	Barigaon
Low	Majhgawan
Low	Bhitkhori
Low	Rautpar
Low	Barpurwa
Low	Belman
Low	Aktahia
Low	Shikargaoh
Low	Usrain
Low	Mathia
Low	Sahua
Low	Tikar
Low	Atrauli
Low	Kintubhar
Low	Parshadipur
Low	Malhanpar
Low	Baghaura
Low	Bhainsa
Low	Kaithauli
Low	Lahidandi
Low	Hundra
Low	Rataripura
Low	Sonai Buzurg
Low	Gauri Buzurg
Low	Khajahia
Low	Karwania
Low	Goplapur
Low	Pochia
Low	Chakia
Low	Kaithauli
Low	Chhedidandwa
Low	Koni Khurd
Low	Deorar
Low	Basauli Khurd
Low	Nokhaipura
Low	Ranapor
Low	Tighra
Low	Dumri
Low	Manjharia
Low	Pakardiha
Low	Diliaghat
Low	Gobraur
Low	Baghrain
Low	Bahidandi
Low	Shah Patti
Low	Masuria
Low	Bhaiyapura
Low	Saintar
Low	Bhaiyapura
Low	Koni Buzurg
Low	Dandwa Manohar
Low	Kasht Deor
Low	Jagdishpur
Low	Ekll
Low	Dhusi
Low	Barigaon
Low	Bhiti
Low	Raghunathpur
Low	Marautia
Low	Mahuapar
Low	Jayantipur
Low	Bar Purwa
Low	Jahaurabad
Low	Shaikh Bheora
Low	Bedauli Paltan Singh
Low	Kanwarpura
Low	Lalpur
Low	Ganeshpur
Low	Kukurbhukwd
Low	Phulhar Buzurg
Low	Gauri Khurd
Low	Gerua Parsaunan
Low	Dighaur
Low	Bijra Tal
Low	Banse
Low	Dishunpur Matiara
Low	Hariharpur
Low	Sujanpura
Low	Amwa
Low	Tikri Khurd
Low	Amarpur
Low	Kaparphorwa
Low	Chandpar
Low	Itaua
Low	Silhata
Low	Kasht Bhoj
Low	Naipura
Low	Barhyapar(Bhadar)
Low	Bharaulia
Low	Naipura
Low	Uska
Low	Asekhoo
Low	Mitthabel
Low	Dulahra
Low	Panrar
Low	Jari
Low	Mashapar
Low	Lachhmipur
Low	Mahuar Kol
Low	Donkha Chand
Low	Tikri Buzurg
Low	Phulhar Khurd
Low	Harpur
Low	Narendarpur
Low	Chandpur
Low	Deorar Baboo
Low	Lalpur
Low	Ratanpura Babu
Low	Bankata
Low	Bharkachha
Low	Khaorha Dewar
Low	Pinria
Low	Pandepura
Low	Kotsikra
Low	Balua Gopalpur
Low	Bijaura
Low	Ahirpurwa
Low	Chhatiari
Low	Hardani
Low	Sanwa
Low	Hariharpur
Low	Dubauli
Low	Mohanpur
Low	Chorbhari
Low	Tanwahia
Low	Diwa
Low	Nakaha
Low	Dumraila
Low	BARDIHA
Low	Ufrauli
Low	Mahdewa
Low	Majhari Purwa
Low	Chhitahri
Low	Nakwar Ghat
Low	Chaitra
Low	Baraban(Badain)
High	Barwa
Low	Lakaria
Low	Pharndia Buzurg
Low	Katharia
Low	Pakhanpur
Low	Nakeahian
Low	Gochharan
Low	Baitaba
Low	Bhilaha Pande
Low	Kharkhunta
Low	Nakwar
Low	Nibhi
Low	Danwa Chatur
Low	Amauli
Low	Baraitola
Low	Komalpura
Low	Barpar Ponde
Low	Karouni
Low	Kunarpar
Low	Budhaura
Low	Beldaripura
Low	Kutiya
Low	Darzi Purwa
Low	Matiara
Low	Teliabhar
Low	Baklaha
Low	Phailah
Low	Patkhauli
Low	Nouabari
Low	Sahridand
Low	Jigna Bhaon
Low	Baur Dih
Low	Pharandia Khurd
Low	Kishunpur
Low	Danwa Chatur
Low	Belahi
Low	Bishunpura
Low	Baijnatha
Low	Danri
Low	Bhaurahi
Low	Malhanpar Khurd
Low	Pachhimpura
Low	Gerua
Low	Phului
Low	Baraipar
Low	Katwar
Low	Pandeori
Low	Bairahi
Low	Maghipar
Low	Bhagour
High	Longiadih
Low	Gularia
Low	Budhaura
Low	Batahra
Low	Nakwar
Low	Danwan
Low	Bhaironpur
Low	Ghoth
Low	Balo Chak
Low	Kataharwa
Low	Jogia
Low	Math Biharidas
Low	Raghua Dih Buzurg
High	Lilkanth Sahi
Low	Sairon
Low	Roha
Low	Harilwa
Low	Kalyanpur
Low	Nonav
Low	Bhagne
Low	Kormaita
Low	Khutaha
Low	Dandi Rawat
Low	Hatwar
Low	Jairam Kol
Low	GOCHHWAL
Low	Jagdishpur
Low	Bhainsa Harihar
Low	Barohi
Low	Israuli
Low	Singra
Low	Kohatarup
Low	Dangipar
Low	Lachhmpur
High	Barahra
Low	Baraila Tal
Low	Bankatia
Low	Bharohia
Low	Parsia
Low	Musrad
Low	Nagwa
Low	Manjharia Khurd
Low	Jalti
Low	Barohri
Low	aunrarup
Low	Kasihar
Low	Kothaghurhu
High	Raghunandanpur
Low	Raghupatti
Low	Newas
Low	Keotantola
Low	Kandhauli(Kanhauli)
Low	Kewtan
Low	Lalapur
Low	BASDILA
Low	Pagar
Low	Piprapat
Low	Purniha
Low	Sakhuana
Low	Sonahna
Low	Kulran
Low	Raghua Dih Khurd
Low	SUKHNIA
Low	Dandwa Ramchandar
Low	Hardia
Low	Saraighat
Low	Parai Danr
Low	Dadaura
Low	Sarsopar
Low	Kuchaita
Low	Bangla
Low	Arazi Mahuapar
High	Bodhi Chhapar
Low	Mahmoodpur
Low	Basuhi
Low	Kothaghurhu
Low	Gorsaira
Low	Ahirantola
Low	Bhatpar
Low	Mator
Low	Padri
Low	Chaubepura
High	Chainpur
High	Nunia
Low	Bastia
Low	Belwa
Low	Rampur
Low	Barahi Purwa(Bar Purwa)
Low	Situapur
Low	Loharpurwa
Low	Dihghat
Low	Dadoora
Low	Pinria
Low	Barampur
Low	Amraiya
Low	Pakarghat(Dhebri)
Low	Dughra
High	Duldulia
Low	Silhata Mundera
High	Bankata Bazar
Low	Kuiran
Low	Deorar Babu
Low	Sairon
Low	Paikauli
Low	Baidauli Baijnathsingh
Low	Darha Khurd
High	Sherpur Barahra
Low	Chandhar
High	Jagat Gobind
Low	Pasitola
Low	Bharwal
High	Chhota
Low	Got Ki jot
Low	Kandhauli
Low	Mahmudpur
Low	Bhuswal Khurd
Low	Pakri Damadar
Low	Majhauwa
High	Simri
Low	Mahuapar
Low	Shukul Jot
Low	Rashnapar
Low	Solabhartola
Low	Bheusa
Low	Amghat
Low	Tonrai
High	Balewa
Low	Etaura
Low	Sonbarsatala
Low	Mahansi
High	Karaundh
Low	Dhamaur
Low	Tongrl
Low	Bhatwali
Low	Semra
Low	Nauki Bazar
Low	Belhra
High	Narainpur
Low	Updhaulia
Low	Ghaisra
Low	Murdewa Chok
Low	Ina Dih
Low	Malaon
Low	Kharhari
Low	Bamhan Bhainsa
Low	Rajpur
Low	Khadiapar
Low	Baijudiha
Low	Bhotuha
Low	CHAK RAJAPUR
Low	Deoghata
Low	Kanail
Low	Bishunpura
Low	Bistauli Buzurg
Low	Katia
Low	Kol Pahia
Low	Nakahatola
Low	Karahi
Low	Karahi
Low	Bhitaha Kumwar
Low	Hathkhal
Low	Bistauli Khurd
Low	Bhainsa
Low	Karwania
Low	Dhanauji
Low	Piprahia
Low	Bhera Chak
Low	Bharohia
Low	Sukrauli
Low	Belipar
Low	Banaitha
Low	Bhatiari
Low	Bhuswal Buzurg
Low	Jigina Tiwari
Low	Ghasaria
Low	Gohipur
High	Bhatahi
Low	Kuiran
Low	Deokali Khurd
Low	RIKWA
Low	Gohli Basant
Low	Sonra
High	Belwa Alamdas
Low	Mathia
Low	Aunji
Low	Naukatola
Low	Rajwal
Low	Majhwa
High	Dharam Rai
Low	Karhal
High	Bhatahi Khurd
Low	Gobind Chak
Low	Bandua Chatur
Low	Jhinga Babu
Low	Paisa
Low	Parsia
Low	Natwa
Low	Ramnagar
Low	Katea
Low	Badra
Low	Gorra
Low	Naukatola
Low	Ghatull
Low	Ahiran
High	Sumahi
Low	Dhanaipur
High	Gushain
High	Bhatwa
Low	Kasehra
Low	Majhgawan
High	Hatwa
Low	Rajdhani
Low	Pipra
Low	Pirarahia
Low	Satahra Mohan
Low	Konan Sonbarsa
Low	Gopalpur
Low	Arah
Low	Ghorsari
Low	Bhasman
Low	Deokali Buzurg
Low	Chak Baid Purwa
Low	Bakuchi
Low	Kharauhan
Low	Biku Bhainsa
High	Khairatia
Low	Dhgnaipur
Low	Gopipur
Low	Panapar
Low	Karamdewa Buzurg
Low	Bhiswa
Low	Khanrha Deor
Low	Barhi
Low	Nilami
Low	Jaipalpur
Low	Balughata
Low	Beludjha
Low	Kharphara
Low	Bhuswa Buzurg
High	Rampur
Low	Tendua Khurd
Low	Gajari
High	Imlia
Low	Kaithwalian
Low	Karelabhari
Low	Bhitaha
Low	Katahriatola
High	Lohraulia
Low	Jigni Danr
Low	Karamdewa Khurd
Low	Bhiti
Low	Tengri
Low	Balghataghat
Low	Beni Jot
Low	Ghansahi
High	Bhanpur
Low	Dehra Dabar
Low	Bela
Low	Tenuha
Low	Hathkhal
Low	Kharphara
High	Uda Bhagat
Low	Shiva Pur
Low	Simrauna
Low	Sanwarupur
Low	Barhni
Low	Teurkhawan
High	Chakia
Low	Dhakrauli Dhubauli
Low	Thathaur
Low	Deonathpur
Low	Kharharwa
High	Bhatahi
Low	Mahual
High	Gushain
Low	Siar
Low	Kasimpur Jigni
Low	Atraura
Low	Karmajhatola
Low	Rupanari
High	Shankarpatti
Low	Lalobar
High	Daria
Low	Pakwatola
Low	Naurdeor
Low	Barhawa
Low	Sarbasi
Low	Tulsi Pande
High	Barsatpur
High	Pachrulhra
Low	Daunrpar
High	Naktaha
Low	Unchgaon
Low	Aunrai
Low	Badara
Low	Barbasaha
Low	Bhaisahi Naresh
Low	Khiryahwa
Low	Charahla
Low	Unaula
High	Bharsandwa
Low	Balra
High	Jaddughori
Low	Khairi
Low	Ainwan
Low	Jhunria
Low	Kuan Khurd
Low	Kuan Buzurg
Low	Banspar
Low	Ahirwati
Low	Chandlaha
High	Nathapatti
Moderate	Margia
High	Sumahi
Low	Sokahna
Moderate	Nauhar Sah
Low	Senwapar
Low	Khatalia
Low	Baraipar
Low	Jamauli Bujurg
High	Mahuabar
High	Basdila
Low	Chakdah
Low	Garaina
Low	Gosampur
Low	Bahuripar
Low	Sisihwa
Low	Kalwari
Low	RESULAPUR JANGAL
Low	Benwa Tikar
Low	Naukatola
Moderate	Bahadurpur
Low	Kathiori
Low	Tama
Low	Piash
Low	Bheori Khargram
Low	Jakhnigaon
Low	Ekama
Low	Goraritola
Low	Deoriaza
Low	Chandauli Khurd
High	Pachrukhia
Low	Porsauni
Low	Ekma
Low	Raji
Low	Khainrati
Low	Koeripurwa
Low	ACHHEHWA
High	Patkhauli
Low	Mangalpur
Low	Aunrai
Low	Bahuripar Khurd
Low	Parsaun
Low	Baghaila
Low	Kaithauli
Low	Bhaisah
Moderate	Haphua Jiwan
Low	Deoara
Low	Ataria
Low	Bogeswaridevi Tanda
Low	Hardi Chak
Low	Jamauli Khurd
Low	Gidaha
Moderate	Haphua Chaturbhuj
Low	DEOKALI
Low	Kaurrtol
Low	Bheori
Low	Bargadwa
Low	Katrar
Low	Chandauli Buzurg
Low	Lachhmanpur
High	Amarpur
High	Sumahi Khurd
Low	Kataicha Bindan
Low	Sonari Ramchandra
Low	Dubauli
Low	Digha
Low	Bilrahwa
High	Kastura
Low	Chautarwa
Low	Dhebra
Low	Aima
High	Mundera
Low	Shekhpura
Low	Sopara
Low	Kuin
High	Pitambarpur
Low	Chaka Nakdah
Low	Daria Dih
High	Pachrukhiatola
Moderate	lJolahbarl
Moderate	Bintolia
Moderate	Jagdishpur
Moderate	Pipra Bhairo
Moderate	Nainu Pahru
Moderate	Bahadurpur
Low	Mahuraiya
Low	Jagarnathpur
Moderate	Bishnathpur
Moderate	Salemgarh
Moderate	Miyan
Moderate	Chak Deiya
Low	Nagawan
Low	Chak
Low	Shalkhpurwa
Low	Suadda
Low	Dhauripar Parhya
Low	Mohnapur
Low	Thakaichpar
Low	Karjahi
Low	Dihapura
High	Pakariar
Moderate	Julaha
Low	Katrari
Moderate	Sukhdew Patti
High	Chaura
Moderate	Khakharwatola
Low	Charpan Khurd
Low	Harnahi
Low	Banaihta
High	Pharendaha
Low	Chak Bangla
Low	Ahamadpur
Low	Hata
Moderate	Panditpur
Low	Nawapar
Low	Supra
Low	Dubaria
Low	Murdewa
High	Chhattu Katea
Moderate	Solgarhi
Moderate	Rampur Bangra
Low	Neosa
Low	Bhainsahla
Low	Sonari Shankar
Moderate	Chakdahwa
Moderate	Taria Lachhiram
Moderate	Amdiha
Moderate	Jogidas Kuti
Moderate	Kalthaulia
Low	Sannsi
High	Pakriar (Binwalia)
Low	Gondsaira
Low	Alapar
High	Chaura
Moderate	Pipra Manni
Low	Muria
Low	Natani
Low	Kolhat
Moderate	Lachhmipur
Moderate	Baghra
High	Srikishan Sahi
Low	Bhitaha
Low	Supri
Low	Charpan Buzurg
High	Tola Ramtawakal Sahi
Moderate	Jamsari
Moderate	Anirauli Dan
Moderate	Ram Dihal
Moderate	Saraia Khurd
Low	Gajar Jogais
Moderate	Rampur
Moderate	Khapria Bhar
Moderate	Satahwa
Moderate	Belhi
Low	Sangrampur
Low	Mahdeiya
Moderate	Harbanspatti
Low	Kusmaul
Moderate	Jamunia
Low	Jhakahi Baisan
Moderate	Naukatola
Moderate	Nakaitola
Low	Gopal Deoria
Low	Jhunria
Moderate	Barhara
High	Rampur
Low	Semeri
Moderate	Sukkika
High	Mathia
Low	Karpaiya
Low	Khajuri
Low	Raksa Babu
High	Lathaur
Low	Gahana
Low	Sahijana
Moderate	Pande
Low	Machauli
Moderate	Adhmauli
Low	Neosa
Moderate	Chhapra
Low	Gajar Bansman
Low	Chamrauti
Moderate	Taria Harkes
Low	Bhela Kharg
Low	Sohupar
Low	Dhaski Buzurg
High	Tarwanwan
Moderate	Khudra
Low	Bheosa
Moderate	Tinphiria
Moderate	Semra
Low	RAMPUR KHURD
Moderate	Gauri
Low	Pipra Ganga
Low	Jhakahi (Usmanpur)
Moderate	Sirampatti Mathia
High	Kumian
Moderate	Mohtan
Low	Sisai
Moderate	Bhaupur
Moderate	Jangol
Low	Deoria
Moderate	Siswa Buzurg
Low	Basawatola
Moderate	Dosoukdtha
High	Sonbarsa
Moderate	Amahia
Low	Pakri Mian
Low	Nibia
Moderate	Moti Pakar
Low	Rakauli
Low	Gajarnarsingh
Low	Rehra
Moderate	Salemgarh
Moderate	Banjarwa
Low	Mahrauli
Low	Paripar
Low	Jurapur
Moderate	Lachhmanpur
Moderate	Makundpur
Moderate	Chaupatia
[truncated: 6,975 more rows]
